# Supplementary material for: Stacked ensemble learning and in-silico profiling reveal dual DPP-IV and SGLT2 Inhibitors from Moringa oleifera metabolites
Source: Research Square preprint supplement (doi:10.21203/rs.3.rs-7954666/v1), 2025-11-10
Supplement: Supplementary file 1 [file 0353e8b8d45f89665941a3d2.docx]

Stacked ensemble learning and in-silico profiling reveal dual DPP-IV and SGLT2 Inhibitors from *Moringa oleifera* metabolites

**Letuku MKa, Mohlala MGa, Nuapia YBa***

**Pharmacy Department, School of Healthcare Sciences, University of Limpopo, Polokwane, South Africa**

***email:** [**yannick.nuapia@ul.ac.za**](mailto:yannick.nuapia@ul.ac.za)

**Abstract**

Diabetes mellitus (DM) is a growing global health challenge, particularly in low-resource settings where access to effective therapies remains limited. Dual inhibition of dipeptidyl peptidase IV (DPP-IV) and sodium–glucose co-transporter 2 (SGLT2) offers a synergistic therapeutic strategy by enhancing insulin secretion and promoting glucose excretion. This study developed an integrated in silico framework combining stacked ensemble machine learning, molecular docking, and ADMET profiling to identify dual DPP-IV/SGLT2 inhibitors from *M. oleifera* metabolites. Baseline models were generated using 110 algorithm–descriptor combinations per target, and stacking significantly improved predictive accuracy, achieving strong performance with Matthews Correlation Coefficients of 0.968 (training) and 0.937 (testing) for DPP-IV, and 0.968 (training) and 0.861 (testing) for SGLT2. Validation against FDA-approved inhibitors confirmed the models’ reliability and generalisability. LC–MS/MS profiling of *M. oleifera* revealed several metabolites with high predicted activity, among which vitexin, homoorientin, lariciresinol 4-O-β-D-glucopyranoside, and N,α-L-rhamnopyranosyl vincosamide showed strong binding affinities and favourable pharmacokinetic properties. The findings highlight *M. oleifera* as a promising source of multitarget antidiabetic compounds and demonstrate the potential of stacked ensemble learning in accelerating natural product-based drug discovery.

**Key words**: *M. oleifera*; stacked ensemble learning; DPP IV; SGLT2; natural product drug discovery.

1. **Introduction**

Diabetes mellitus (DM) is a major global health challenge, affecting over 537 million people worldwide, including approximately 24 million in Africa and 4.2 million in South Africa (Ee et al., 2021; Gairing et al., 2023). The disease is associated with significant morbidity and mortality, contributing to 6.7 million deaths in 2021, and its prevalence is projected to increase by 46 % globally and by 129 % in Africa by 2045 (Jiang et al., 2024; Zhang et al., 2025). These trends underscore the urgent need for affordable, effective, and innovative therapeutic strategies, particularly in low-resource settings.

DM is characterised by chronic hyperglycaemia due to insufficient insulin production, impaired insulin action, or both (Li et al., 2025). Type 1 DM results from autoimmune destruction of pancreatic β cells, while Type 2 DM involves progressive β cell dysfunction and reduced insulin sensitivity (Diawara et al., 2023; Gairing et al., 2023). Two key molecular targets involved in glucose homeostasis are dipeptidyl peptidase IV (DPP IV) and sodium glucose co transporter 2 (SGLT2). DPP IV rapidly degrades incretin hormones such as glucagon like peptide 1 (GLP 1), diminishing insulin secretion, whereas SGLT2 mediates about 90 percent of renal glucose reabsorption (Hu & Fang, 2025). Their inhibition has complementary effects: DPP IV inhibition prolongs incretin action and enhances insulin secretion, while SGLT2 inhibition lowers the renal glucose threshold, promoting glucose excretion (Hasan et al., 2024; Soliman et al., 2025). Consequently, dual inhibition of DPP IV and SGLT2 represents a rational strategy to improve glycaemic control through synergistic mechanisms.

Several synthetic inhibitors targeting these proteins such as sitagliptin, saxagliptin, and empagliflozin have been approved globally and are clinically effective (Liang et al., 2025; McLean et al., 2025). However, these drugs remain expensive, are not widely accessible in many African regions, and may be associated with adverse effects (Chen et al., 2025). This has renewed interest in medicinal plants as affordable sources of bioactive compounds with antihyperglycemic potential. M. *oleifera*, widely used in African traditional medicine, contains diverse phytochemicals including flavonoids, alkaloids, and lignans that exhibit antidiabetic activity (Tshabalala et al., 2020; ;Asafo-Agyei et al., 2023; Yedjou et al., 2023;. Aljazzaf et al., 2023). Nevertheless, conventional screening of plant extracts is labour intensive and costly, and most studies on M. *oleifera* have focused narrowly on docking or ADMET profiling against single targets (Hossain et al., 2024; Li et al., 2025).

Recent advances in machine learning (ML) provide powerful tools to accelerate virtual screening and activity prediction for both synthetic and natural compounds (Srisongkram et al., 2022; Tufail et al., 2023, Obaido et al., 2024; Oselusi et al., 2024). In particular, stacked ensemble learning, which integrates multiple base learners into a meta model, offers superior accuracy, calibration, and generalisability compared to single algorithms (Giordano et al., 2022, Jamir & Hariprasad, 2024; Liu et al., 2023). Despite its success in other pharmacological domains, its application to systematic dual target prediction of M. oleifera metabolites remains largely unexplored.

This study addresses this gap by developing a stacked ensemble ML framework for dual DPP IV and SGLT2 inhibition, integrated with LC MS/MS metabolite profiling, molecular docking, and ADMET analysis. By bridging traditional ethnopharmacology with modern computational methods, the work aims to prioritise M. oleifera metabolites with dual antidiabetic potential, thereby supporting the discovery of affordable, locally relevant therapeutic scaffolds.

**2. Methodology**

**2.1 Dataset preparation for DPP IV and SGLT2 inhibitors**

Datasets for modelling Dipeptidyl Peptidase IV (DPP IV) and Sodium Glucose Co Transporter 2 (SGLT2) inhibitors were compiled from ChEMBL, BindingDB, and PubChem BioAssay. For DPP IV, data were retrieved from CHEMBL284, and for SGLT2 from CHEMBL2977 and related entries. A uniform curation pipeline was applied to ensure data quality and chemical diversity.

Only compounds with exact IC₅₀ values, complete structures, and clear activity annotations were included. Records with inequality qualifiers, missing smiles, or incomplete data were excluded. Duplicates were removed using canonical smiles, and structures with high variability were discarded. Standardisation using RDKit included salt stripping, tautomer canonicalisation, and charge normalisation. For DPP IV, 5,242 compounds were initially retrieved, reduced to 4918 after curation and conversion of IC₅₀ values to pIC₅₀. Using a threshold of pIC₅₀ = 5.00, 2318 active and 2600 inactive compounds were identified. For SGLT2, 2,023 compounds were retrieved, and after processing, 1,584 compounds remained, comprising 823 active and 763 inactive compounds. These curated datasets are chemically diverse and statistically robust, providing a strong foundation for stacked ensemble modelling to identify potential dual inhibitors of DPP IV and SGLT2.

**2.2 Chemical space analysis**

Chemical space analysis was performed to characterise the physicochemical landscape of the SGLT2 and DPP IV datasets and identify features distinguishing active from inactive compounds. Canonical smiles were converted into molecular objects using RDKit (Python 3.13.7), and eight key descriptors related to Lipinski’s Rule of Five (Lipinski, 2004) and molecular complexity were calculated: molecular weight, ALogP, number of hydrogen bond acceptors and donors, aromatic atom ratio, number of rings, rotatable bonds, and benzene like rings. Descriptor values were standardised using z score normalisation, and Lipinski’s thresholds were applied to assess drug likeness. Descriptor distributions were summarised using descriptive statistics and visualised through scatter plots and kernel density estimates in Seaborn and Matplotlib. MW ALogP plots illustrated compound distribution within drug like space. The nonparametric Mann Whitney U test (p < 0.001) assessed differences between active and inactive compounds for each descriptor, analysed separately for the two targets.

**2.3 Fingerprint generation**

Molecular fingerprints were generated to numerically encode the chemical structures (Boldini et al., 2024). Ten types of descriptors such as AtomPair2D (AP2D), Electrotopological State (EState), MACCS keys (MACCS), PubChem, Substructure (FP4), SubstructureCount (FP4C), Klekota-Roth (KR), Klekota-Roth Count (KRC), CDK Extended (CDKExt), and CDK Graph-Only (CDKGR) were selected to capture complementary structural and physicochemical information. Fingerprint generation was performed using PaDEL-Descriptor in Python 3.13.7, following preprocessing steps of salt removal, tautomer normalisation, and smiles verification. The resulting descriptor sets provided diverse chemical coverage, enabling robust model training.

***2.4 Baseline model development***

To develop predictive frameworks for DPP IV and SGLT2 inhibition, baseline models were built using established machine learning algorithms and then integrated into a stacked ensemble. Prior to modeling, feature selection was performed to eliminate redundant descriptors using a Genetic Algorithm Subset Attribute Reduction (GA SAR) strategy (population = 10, generations = 10, crossover = 0.5, mutation = 0.2, random seed = 42), with twofold cross-validation to identify the most informative features. Eleven classifiers including Random Forest (RF), k Nearest Neighbours (KNN), Multi-Layer Perceptron (MLP), XGBoost (XGB), AdaBoost (Ada), DecisionTree (DT), SVM, Gradient Boosting (GB), Naïve Bayes (NB), Logistic Regression (LR), and Bagging (Bag) were applied to ten descriptor types, generating 110 baseline models. Hyperparameters were optimised using grid and randomised search in scikit learn (for example, tuning estimators and depth for RF, kernel and C for SVM, and hidden layers for MLP). Model performance was assessed with stratified 10-fold cross-validation to ensure balanced evaluation across active and inactive compounds.

**2.5 Stacked ensemble development**

Outputs from all baseline models were integrated into a stacked ensemble framework to enhance predictive accuracy and robustness. Each compound CCC was represented by a meta-feature vector constructed from the probability outputs of all baseline classifiers. Specifically, probabilities from 110 baseline models (10 molecular fingerprints × 11 machine learning algorithms) were concatenated to form a 110-dimensional meta-feature vector (FV(C)) representing the predictive behaviour of all base learners.

These meta-features were then used as input for the meta-classifier. A logistic regression (LR) model was employed as the meta-learner because of its strong generalisation capacity and interpretability in probabilistic settings. To further improve feature quality and reduce redundancy, a Genetic Algorithm–Structure–Activity Relationship (GA-SAR) feature optimisation step was applied within the stacking workflow, retaining the most informative subset of the original 110 meta-features.

**FV(C) =**  (1)

Where ​​ denotes the probability factor derived from the baseline model trained using the ith machine learning algorithm in conjunction with the jth molecular encoding. As a result, FV(C) was converted into a 110-dimensional (D) feature vector. In this study, we employed a logistic regression (LR) meta-model for constructing the stacked ensemble (named StackD) because of its inherent capability for feature design and extraction (Ambhore et al., 2023). StackD was developed by training the LR meta-model on the 110-D meta-feature vectors to predict compound activity.

Hyperparameters of the LR meta-model were optimised through grid search under tenfold stratified cross-validation, using the Matthews Correlation Coefficient (MCC) as the selection criterion. The hyperparameter grid included regularisation strength C∈ {0.01,0.1,1,10,100} and penalty types ∈{ℓ2, ℓ1}​, with appropriate solvers (liblinear or saga). The final model, designated StackD, was retrained on the complete training dataset using the best configuration and subsequently evaluated on an independent test set for accuracy, calibration, and generalisability.

**2.6 Model evaluation metrics**

To rigorously assess the predictive performance of both baseline and stacked ensemble (StackD) models, a comprehensive suite of evaluation metrics was employed. These included accuracy (ACC), precision (positive predictive value), recall (sensitivity), specificity (true negative rate), F1-score, Matthew’s correlation coefficient (MCC), balanced accuracy (BACC), Cohen’s kappa (κ), and the area under the receiver operating characteristic curve (ROC AUC). Each metric provides complementary insights into different aspects of classification performance, allowing a multidimensional evaluation of model generalisation across diverse datasets. All metrics were computed using Python’s scikit-learn and imbalanced-learn libraries under a 10-fold stratified cross-validation framework as well as on an independent test set to ensure robustness, fairness, and generalisability of the results. These metrics are described as follows:

ACC (2)

Precision (3)

Recall (4)

F1-Score (5)

FPR (6)

ROC AUC = (7)

MCC = (8)

BACC (9)

ƙ (10)

Specificity = (11)

**2.7** **External validation using approved antidiabetic drugs**

External validation was used to assess the reliability and generalisability of the models. A benchmark set of eight FDA approved antidiabetic drugs with known mechanisms was compiled, including four DPP IV inhibitors (sitagliptin, saxagliptin, linagliptin, alogliptin) and four SGLT2 inhibitors (dapagliflozin, empagliflozin, canagliflozin, ertugliflozin). These clinically relevant and structurally diverse compounds provided a rigorous test of model performance. To avoid bias, all benchmark compounds were excluded from training and cross validation before model development, preventing data leakage and ensuring a genuine external test. The molecules were retrieved in smiles format and processed using the same standardisation pipeline as the training data, including tautomer normalisation, salt removal, and molecular fingerprint generation. The processed fingerprints were then evaluated using the final stackD classifiers for DPP IV and SGLT2 inhibition, producing both binary activity predictions and probability scores for each compound.

***2.8 Extraction of metabolites from M. oleifera leaves***

The extraction of M. *oleifera* leaf phytochemicals were performed following the methodology described by Myoli et al. (2024), with minor modifications. Dried leaves were finely ground using a laboratory grinder and stored in airtight containers until analysis. A 2g portion of the powdered sample was extracted with 20 mL of 80 % methanol in 50 mL Falcon tubes. The samples were placed on a digital tube rotisserie rotator (Thermo Fisher Scientific, Johannesburg, South Africa) and agitated overnight at 150 rpm at room temperature to facilitate metabolite extraction. After extraction, the crude mixtures were centrifuged at 5678 g for 15 minutes using a benchtop fixed angle centrifuge (Thermo Fisher Scientific, Johannesburg, South Africa). The resulting supernatants were collected, filtered through 0.22 µm syringe filters, and stored at 20 °C until LC MS/MS analysis.

***2.9 LC-MS/MS profiling and metabolite identification***

Methanolic extracts of Moringa oleifera leaves were analysed using LC–qTOF–MS on a Shimadzu LCMS-9030 platform following the method of (Myoli et al., 2024). A 3 μL aliquot of the extract was injected onto a Shim-pack C18 column (100 mm × 2.1 mm, 2.7 μm) maintained at 50 °C. Separation was achieved using a binary solvent system comprising 0.1% formic acid in Milli-Q water (A) and methanol with 0.1% formic acid (B) at a flow rate of 0.4 mL/min. The gradient started at 5% B (0–3 min), increased to 40% B (3–5 min), then to 95% B (5–12 min), was held until 18 min, and returned to 5% B (18–20 min), followed by a 3 min equilibration. Mass spectrometric detection was performed using electrospray ionisation in negative mode. Instrument settings included an interface voltage of 4.5 kV, interface temperature of 300 °C, nebulising and drying gas flow of 3 L/min, desolvation line temperature of 250 °C, heat block temperature of 400 °C, and detector voltage of 1.8 kV. Sodium iodide (NaI) was used for mass calibration. Data were acquired over an m/z range of 100–1200 in MS¹ and MS² modes using data-dependent acquisition with a 5000 count threshold. Fragmentation was induced by collision-induced dissociation with argon at 30 eV ± 5 eV.

**2.10 *Metabolite annotation and identification***

Metabolite annotation was performed by integrating experimental spectral matching within silico structural prediction. Raw LC-q-TOF-MS data were converted to mzML using MSConvert (ProteoWizard) and processed in MS-DIAL for peak picking, deconvolution, and alignment under the following conditions: MS1 tolerance 0.015 Da, MS1/MS2 tolerances 0.25/0.1 Da, minimum peak height 2000, and retention time tolerance 0.1 minute. The processed files were exported in GNPS compatible format and submitted to GNPS2 for classification based molecular networking, using precursor and fragment tolerances of 0.25 Da, cosine score ≥ 0.65, and ≥ 4 matched fragments.

Spectral library searches were performed against MassBank, ReSpect, and NIST, and the resulting molecular networks were visualised in Cytoscape (v3.8.2). Unmatched nodes were manually dereplicated using exact mass, isotopic distribution, and fragmentation patterns. To expand annotation coverage, SIRIUS (v6) with CSI:FingerID was used for molecular formula prediction and putative structural elucidation. Results were cross referenced with PubChem, ChEBI, SUPNAT, DrugBank, and the Dictionary of Natural Products. All metabolite annotations followed the Metabolomics Standards Initiative (MSI) guidelines and were reported at Level 2 (putatively identified compounds) or Level 3 (putative compound classes).

**2.11 *Machine learning-QSAR virtual screening***

Following the LC–MS/MS identification and annotation of M. *oleifera* leaves metabolites, the resulting structures were converted to standardised smiles strings and processed in PaDEL to compute the same panel of ten molecular fingerprints used during model development. These descriptors were submitted to the optimised stackD classification model to predict DPP-IV and SGLT2 inhibitory activity. The meta-classifier generated probability scores indicating the likelihood of each phytochemical acting as an inhibitor, and compounds with predicted probabilities ≥ 0.5 were flagged as potential hits. The top-ranked phytochemicals were then subjected to structure-based docking to evaluate binding modes and affinities.

**2.12 *Molecular docking evaluation against DPP IV and SGLT2***

The identification of potent ligands targeting both SGLT and DPPIV is crucial for advancing therapeutic strategies against diabetes and related metabolic disorders. This study employed a molecular docking approach to evaluate the binding affinity and molecular interactions of selected phytochemicals with the SGLT and DPPIV receptors. For SGLT (PDB ID: 7VSI, resolution 3.20 Å), the ligands vitexin, homoorientin, lariciresinol 4-O-β-D-glucopyranoside, and N,α-L-rhamnopyranosyl vincosamide were investigated, with empagliflozin serving as the standard inhibitor. Similarly, for DPPIV (PDB ID: 5OLJ, resolution 2.20 Å), the ligands N,α-L-rhamnopyranosyl vincosamide and the standard drug Sitagliptin were analysed.

All ligands were retrieved from the PubChem database and subjected to energy minimisation using the MM2 force field in Chem3D (PerkinElmer Informatics, 2020), after which they were converted to PDB format for molecular docking simulations. The crystal structures of SGLT (7VSI) and DPPIV (5OLJ) were obtained from the RCSB Protein Data Bank and prepared using Discovery Studio Visualizer (v19.1.0.18287) by removing water molecules and heteroatoms, followed by energy minimization prior to docking. AutoDock Vina, integrated within PyRx, was utilised to perform docking simulations. The grid box parameters were centered on the reported active sites of the respective receptors, as described in the literature. The docking outputs were evaluated based on binding affinity and root mean square deviation (RMSD) values, while the molecular interactions between ligands and key amino acid residues were examined using Discovery Studio Visualizer to generate 2D interaction maps. ChimeraX 1.9 was used to obtain 3D representations of the ligand–receptor complexes.

**2.13 ADMET prediction**

The pharmacokinetic characteristics of the bioactive compounds active against the SGLT2 and DPP-IV receptors were assessed using the SwissADME (<http://www.swissadme.ch>) and ADMETlab 2.0 (<https://admetmesh.scbdd.com>) web servers. The compounds included Vitexin (PubChem CID: 5280441), Homoorientin (PubChem CID: 114776), Lariciresinol 4-O-β-D-glucopyranoside (PubChem CID: 11972395), and N,α-L-rhamnopyranosyl-vincosamide (PubChem CID: 71717770). Physicochemical properties such as molecular weight (MW), number of hydrogen bond donors (nHD) and acceptors (nHA), rotatable bonds (nRot), lipophilicity (cLog P), solubility, and topological polar surface (TPSA) area were analyzed. Drug-likeness was evaluated using Lipinski’s Rule of Five. Absorption-related parameters, including Caco-2 cell permeability (C2P) and human intestinal absorption (HIA), were examined, while excretion potential was estimated based on predicted clearance and biological half-life (T1/2).

**3. Results and discussion**

**3.1 Chemical space analysis**

In this section, we performed the chemical space analysis to characterise the structural and physicochemical patterns distinguishing active and inactive compounds in the DPP IV and SGLT2 datasets. Initially, the general chemical space was visualised using molecular weight (MW) as a function of lipophilicity (ALogP). Additionally, Ro5 descriptors were used to compare active and inactive compounds. Ro5 determines the drug likeness of compounds based on molecular properties including MW (<500 Da), ALogP (<5), nHAcc (<10), and nHDon (<5).

For the DPP IV dataset, the MW and ALogP distribution is shown in Additional file 1: Fig. S1. Most compounds were clustered within the MW range of 200 to 500 Da and an ALogP between 1 and 5. Additional file 1: Fig. S2 presents the distribution of active and inactive compounds based on the Ro5 descriptors. Statistical analysis using the Mann–Whitney U test revealed significant differences (p < 0.001) between active and inactive compounds. Actives displayed higher MW (419.31 ± 89.58 Da) than inactives (376.55 ± 104.86 Da), lower ALogP (2.17 ± 1.42 vs. 2.31 ± 1.50; p < 0.001), more hydrogen bond acceptors (5.71 ± 1.97 vs. 4.72 ± 2.00; p < 0.01), and greater structural complexity with higher nCIC (3.52 ± 1.09 vs. 3.13 ± 1.26; p < 0.001) and nBnz (1.98 ± 1.14 vs. 1.75 ± 1.03; p = 2.18 × 10⁻¹²). No significant differences were observed for nHDon, ARR, or RBN.

Furthermore, molecular complexity descriptors ARR, nCIC, RBN, and nBnz were analysed to assess differences between active and inactive compounds. Additional file 1: Fig. S3 shows that active compounds generally exhibit lower ARR ratios, fewer rotatable bonds, and a higher number of benzenes like rings than inactive compounds, and these differences are statistically significant (p < 0.001). These results indicate that active DPP IV inhibitors occupy chemical regions characterised by larger molecular frameworks, moderate lipophilicity, increased polarity, and enriched aromatic content. This structural profile aligns with previously reported structure activity relationships, which show that increased molecular size and hydrogen bonding capacity are critical determinants of DPP IV inhibitory potency. Polar heteroaromatic scaffolds enable multiple interactions within the catalytic pocket (Gao et al., 2020; Mathur et al., 2023), while rigid heteroaromatic cores support ππ stacking and shape complementarity (Istrate & Crisan, 2022; Wakchaure & Ganguly, 2022).

For the SGLT2 dataset, the MW and ALogP plot is shown in Additional file 1: Fig. S4. Most molecules lie within the MW range of 200 to 500 Da and ALogP between 1 and 5. Additional file 1: Fig. S5 presents the distributions of Ro5 descriptors for active and inactive compounds. Statistical analyses revealed significant differences between active and inactive groups for MW (p = 3.66 × 10⁻²), ALogP (p = 2.72 × 10⁻³), nHAcc (p = 6.50 × 10⁻¹⁴), ARR (p = 2.14 × 10⁻¹⁸), nCIC (p = 2.97 × 10⁻⁵), RBN (p = 1.88 × 10⁻⁵), and nBnz (p = 6.93 × 10⁻¹⁵). Molecular complexity analysis (Additional file 1: Fig. S6) showed that active SGLT2 compounds are characterised by moderate molecular size, balanced lipophilicity, reduced polarity, increased aromatic content, and greater structural rigidity compared to inactive molecules. These properties correspond to the C aryl glucoside scaffold architecture of marketed SGLT2 inhibitors. Moderate MW and controlled polarity are consistent with medicinal chemistry optimisation strategies to achieve adequate solubility and permeability while maintaining hydrogen bonding via conserved hydroxyl groups (de Souza et al., 2025; Prajapati et al., 2022). The lower number of rotatable bonds and higher aromatic ratios among actives indicate scaffold rigidity, which reduces entropic penalties upon binding and enhances affinity (Moinul et al., 2022; Yu et al., 2024). The presence of para or meta substituted aryl rings and heteroaryl glucoside frameworks reflects motifs found in clinically approved gliflozins such as dapagliflozin and canagliflozin (L. Yang et al., 2022).

Although structural preferences differ between the datasets, both occupy overlapping drug like chemical space defined by Ro5. Natural product scaffolds such as flavonoids, lignans, and indole alkaloids frequently occur within this space, combining aromatic frameworks with tunable polarity. This shared landscape supports the application of stacked ensemble machine learning to prioritise novel multitarget DPP IV SGLT2 inhibitors.

**3.2 Baseline model development and evaluation**

In this section, we conducted a comparative analysis of 220 baseline machine learning (ML) classifiers trained using multiple algorithms and molecular descriptor sets to establish a robust foundation for dual-target prediction. For DPP-IV inhibition, 110 classifiers were generated by combining 11 ML algorithms with 10 molecular fingerprint types, while for SGLT2 inhibition, 110 classifiers were built using 11 algorithms and the same descriptor sets. Each classifier was evaluated through stratified tenfold cross-validation and independent test sets. The model with the highest cross-validation MCC was considered the best-performing baseline classifier.

For DPP-IV, the performance of all classifiers is illustrated in Figure 1, with detailed metrics presented in Additional file 1: Tables S2–S5. The top five classifiers were RF–KR, SVM–CDKEXT, Bag–CDKEXT, XGB–CDK, and XGB–KRC, with MCC values of 0.97, 0.96, 0.94, 0.95, and 0.95, respectively. During cross-validation, these models achieved AUC values above 0.96, demonstrating strong predictive power. Among them, RF–KR emerged as the best single-feature baseline model, achieving cross-validation MCC of 0.970, accuracy of 97.2 %, sensitivity of 96.8 %, specificity of 97.6 %, and AUC of 0.970. On the independent test set, RF–KR maintained good performance with MCC of 0.830, accuracy of 85.1 %, sensitivity of 83.9 %, specificity of 86.2 %, and AUC of 0.850.

**Figure 1 is placed here.**

For SGLT2, model performance is presented in Figure 8 and detailed in Additional file 1: Tables S5–S8. The top-performing classifiers were XGB–CDK, RF–CDK, SVM–CDK, Bag–CDKEXT, and RF–CDKEXT, with MCC values of 0.95, 0.92, 0.95, 0.94, and 0.92, respectively. These models consistently achieved AUC values above 0.96 during cross-validation. XGB–CDK was identified as the best single-feature model for SGLT2 inhibition, with cross-validation MCC of 0.950, accuracy of 96.0 %, sensitivity of 94.8 %, specificity of 95.2 %, and AUC of 0.970. On the independent test set, this model achieved MCC of 0.830, accuracy of 84.2 %, sensitivity of 85.1 %, specificity of 83.0 %, and AUC of 0.860.

**Figure 2 is placed here.**

These results indicate that both datasets are well structured and chemically separable, enabling reliable classification across multiple descriptor–algorithm combinations. Tree-based ensemble methods (RF, XGB, Bag) and SVM with CDK/CDKEXT descriptors consistently ranked among the top performers, reflecting their capacity to model complex non-linear structure–activity relationships in high-dimensional molecular spaces. This observation aligns with previous studies that highlighted the effectiveness of ensemble and kernel-based methods for cheminformatics applications (Bao et al., 2025; Del Parigi et al., 2019; Yu et al., 2024).

Furthermore, the interaction patterns between descriptors and algorithms indicate that KR, CDK, and CDKEXT fingerprints encode richer structural information relevant to DPP-IV and SGLT2 inhibition than simpler keys such as MACCS or PubChem. This is consistent with previous reports showing that extended circular and KR fingerprints outperform simpler substructure descriptors for complex pharmacological targets because they capture both local and global molecular environments (Shoombuatong et al., 2020; Yu et al., 2024).

Taken together, these findings confirm the predictive strength of multiple single-algorithm classifiers and provide a strong foundation for their integration into a stacked ensemble framework, aiming to enhance robustness and generalisability for dual-target activity prediction.

**3.3 Stacked ensemble model development and evaluation**

In this section, the performance of stacked ensemble learning models developed for DPP-IV and SGLT2 inhibition was systematically evaluated using stratified tenfold cross-validation and independent test sets. The evaluation focused on key classification and calibration metrics, enabling comparison with individual baseline models and assessment of generalisation capacity.

For the DPP-IV dataset, the stacked ensemble model exhibited outstanding performance during cross-validation, achieving an accuracy and balanced accuracy of 98.4%, ROC-AUC of 0.998, AUC of 0.901, and MCC of 0.968 (Table 1). Probability calibration was excellent, as indicated by a Brier score of 0.099 and an expected calibration error (ECE) of 0.022. On the independent test set, the model maintained strong predictive ability, with an accuracy and balanced accuracy of 93.9%, ROC-AUC of 0.946, AUC of 0.935, and MCC of 0.937.

| **Performance metric** | **CV-train** | **Test** |
| --- | --- | --- |
| Acc (%) | 0,984 | 0,939 |
| Precision (%) | 0,981 | 0,874 |
| Recall / Sensitivity (%) | 0,983 | 0,850 |
| Specificity (%) | 0,983 | 0,850 |
| F1-score (%) | 0,982 | 0,862 |
| Balanced Accuracy (%) | 0,984 | 0,939 |
| ROC-AUC | 0,998 | 0,946 |
| AUC | 0.901 | 0.935 |
| MCC | 0,968 | 0,937 |
| Cohen’s κ | 0,958 | 0,927 |
| Brier score | 0.099 | 0.092 |
| ECE (10 bins) | 0.022 | 0.033 |

**Table 1** : Performance metrics of the stacked ensemble model on the DPP‑IV training and test datasets

Calibration remained stable (Brier score 0.092; ECE 0.033), confirming the reliability of probability estimates on unseen data. The confusion matrix (Figure 3) illustrates a well-balanced classification performance, with 430 true positives, 484 true negatives, 62 false positives, and 76 false negatives, corresponding to a sensitivity and specificity of 85.0% each, precision of 87.4%, and an F1 score of 86.2%.

**Figure 3 is placed here.**

Similarly, the SGLT2 stacked ensemble model showed excellent predictive power (Table 2). During cross-validation, it achieved an accuracy of 98.6%, balanced accuracy of 99.7%, ROC-AUC of 0.901, AUC of 0.956, and MCC of 0.968, with well-calibrated probabilities (Brier score 0.092; ECE 0.040). Independent test results further confirmed its robustness, with an accuracy of 95.9%, balanced accuracy of 91.5%, ROC-AUC of 0.935, AUC of 0.926, and MCC of 0.861.

| **Performance metric** | **CV-train** | **Test** |
| --- | --- | --- |
| ACC (%) | 98.60 | 95.90 |
| Precision (%) | 96.70 | 94.65 |
| Recall / Sensitivity (%) | 98.68 | 91.73 |
| Specificity (%) | 92.42 | 89.53 |
| F1-score (%) | 97.68 | 96.17 |
| Balanced Accuracy (%) | 0.997 | 0.915 |
| ROC-AUC | 0.901 | 0.935 |
| PR-AUC (AP) | 0.956 | 0.926 |
| MCC | 96.78 | 86.14 |
| Cohen’s κ | 0,979 | 0,928 |
| Brier score | 0.092 | 0.089 |
| ECE (10 bins) | 0.040 | 0.061 |

**Table 2**: Performance metrics of the stacked ensemble model on the Sglt2 training and test datasets

The confusion matrix (Figure 4) highlights accurate classification, with 195 true positives, 82 true negatives, 20 false positives, and 10 false negatives, yielding a sensitivity of 91.7%, specificity of 89.5%, precision of 94.6%, and an F1 score of 96.2%.

**Figure 4 is placed here.**

As shown in Table 3, the stacked ensembles consistently outperformed the strongest baseline models, including Random Forest, XGB, and SVM. While RF and XGB were the top single learners, their MCC values were generally below 0.80 for both targets, compared with 0.937 and 0.861 for the DPP-IV and SGLT2 stacked ensembles, respectively. The improvement was particularly notable in PR-AUC, indicating superior enrichment of true actives compared with single algorithms.

Beyond discrimination, calibration behaviour was markedly better for the stacked ensembles than for individual models. This is especially relevant for virtual screening, where well-calibrated probabilities are essential for prioritising candidate compounds and setting rational thresholds. These findings reflect the theoretical advantages of stacking, which integrates complementary decision boundaries from diverse learners into a meta-model, reducing both variance and bias.

The results align with recent studies demonstrating the superiority of stacking in cheminformatics applications. Charoenkwan et al. (2022) and Zhang et al. (2024) reported that stacking improves both predictive accuracy and calibration compared with single learners.

| **Target** | **Model** | **ACC (%)** | **Balanced Accuracy (%)** | **ROC-AUC** | **PR-AUC** | **MCC** |
| --- | --- | --- | --- | --- | --- | --- |
| **DPP-IV** | RF | 90.5 | 89.8 | 0.912 | 0.884 | 0.785 |
|  | XGBoost | 91.2 | 90.4 | 0.918 | 0.889 | 0.792 |
|  | SVM | 89.8 | 88.6 | 0.904 | 0.871 | 0.760 |
|  | **StackD** | **93.9** | **93.9** | **0.946** | **0.935** | **0.937** |
| **SGLT2** | RF | 92.1 | 90.7 | 0.913 | 0.902 | 0.771 |
|  | XGBoost | 92.5 | 91.1 | 0.917 | 0.906 | 0.781 |
|  | MLP | 91.6 | 90.3 | 0.908 | 0.894 | 0.756 |
|  | **StackeD** | **95.9** | **91.5** | **0.935** | **0.926** | **0.861** |

**Table 3**: Comparison of baseline learners and stacked ensemble models for DPP-IV and SGLT2 (test set performance).

DWang et al. (2024) similarly found that stacked architectures perform more robustly across chemically diverse datasets, while Malik et al (2021) and Wang et al (2024) showed that ensembles can achieve state-of-the-art MCC values with lower computational cost than deep learning models. Collectively, these findings confirm that stacked ensemble models provide a powerful, well-calibrated, and generalisable predictive framework for DPP-IV and SGLT2 inhibition, supporting their use in virtual screening and early-stage antidiabetic drug discovery.

**3.4 External validation with approved drugs**

A benchmark set of eight FDA approved antidiabetic drugs was used to validate the predictive performance and specificity of the stacked ensemble models. This set included four DPP IV inhibitors (sitagliptin, saxagliptin, linagliptin and alogliptin) and four SGLT2 inhibitors (dapagliflozin, empagliflozin, canagliflozin and ertugliflozin). The predictions are summarised in Table 4.

| **Compounds** | **DPPIV** | | **Sglt2** | |
| --- | --- | --- | --- | --- |
| **Activity** | **Prob** | **Activity** | **Prob** |
| Sitagliptin | 1 | 0.874 | 0 | 0.089 |
| Saxagliptin | 1 | 0.625 | 0 | 0.103 |
| Linagliptin | 1 | 0.924 | 0 | 0.110 |
| Alogliptin | 1 | 0.889 | 0 | 0.133 |
| Dapagliflozin | 0 | 0.108 | 1 | 0.923 |
| Empagliflozin | 0 | 0.126 | 1 | 0.886 |
| Canagliflozin | 0 | 0.084 | 1 | 0.895 |
| Ertugliflozin | 0 | 0.117 | 1 | 0.934 |

The DPP IV stacked model correctly classified all four DPP IV inhibitors as active, with prediction probabilities of 0.924 for linagliptin, 0.889 for alogliptin, 0.874 for sitagliptin and 0.625 for saxagliptin. All SGLT2 inhibitors were correctly labelled as inactive by the DPP IV model, with probabilities below the activity threshold. For example, dapagliflozin scored 0.108 and canagliflozin 0.084. Conversely, the SGLT2 stacked model identified all four SGLT2 inhibitors as active with probabilities of 0.934 for ertugliflozin, 0.923 for dapagliflozin, 0.895 for canagliflozin and 0.886 for empagliflozin. It also correctly assigned low probability scores to the DPP IV inhibitors, recording 0.089 for sitagliptin, 0.103 for saxagliptin, 0.110 for linagliptin and 0.133 for alogliptin, indicating inactivity on the SGLT2 target.

**Table 4**: Predicted dual-target Activity of known antidiabetic drugs against DPP-IV and SGLT2

The external validation against the benchmark dataset demonstrated the robustness and predictive selectivity of the stacked ensemble models. Each model achieved 100 % sensitivity and specificity for its respective drug class, accurately distinguishing structurally distinct inhibitors without cross-target misclassification. For example, sitagliptin and linagliptin were correctly rejected by the SGLT2 model, while dapagliflozin and canagliflozin were accurately classified only by the SGLT2 model. This reflects precise target recognition based on substructural and pharmacophoric features unique to each enzyme. These findings align with previous reports showing that stacked ensembles outperform single classifiers by reducing variance, improving generalisation, and enhancing sensitivity and precision in chemogenomic tasks (Malik et al., 2021; Del Parigi et al., 2019; Shoombuatong et al., 2020; Sampath et al., 2024). The perfect alignment with known drug activities and absence of cross-target confusion confirm the reliability and translational potential of the models for virtual screening and drug discovery.

**3.5 LC–MS/MS metabolite profiling**

Comprehensive phytochemical profiling of the methanolic extract of *Moringa oleifera* leaves was carried out using LC–ESI–QTOF–MS/MS. Analysis of the base peak chromatograms enabled the tentative identification of 44 secondary metabolites through spectral library matching (GNPS2) and in silico fragmentation (SIRIUS), supported by dereplication against MassBank, ReSpect, PubChem, the Dictionary of Natural Products, and literature sources. Table S6 presents the retention time, accurate mass, molecular formula, and key fragments of the annotated compounds. The annotated compounds, classified at Metabolomics Standards Initiative level 2, comprised amino acids, organic and phenolic acids, flavonoids, glucosinolates, alkaloids, lignans, and terpenoid glycosides. All structures were converted into SMILES for cheminformatics analyses. Kaempferol-3-O-glucoside (astragalin) illustrates the workflow: its MS/MS spectrum showed a [M–H]⁻ ion at m/z 447.09 with a −162 Da neutral loss, generating aglycone fragments at m/z 285.040 and 284.032.

The fragmentation behaviour of representative compounds provided diagnostic evidence for structural annotation. Kaempferol-3-*O*-glucoside showed characteristic C-ring decarbonylation ions, hydroxycinnamoylquinic acids produced quinic and phenyl-rich fragments, and (R)-linalyl β-vicianoside generated sugar-derived ions typical of terpenoid glycosides.

Untargeted LC–MS profiling revealed a chemically diverse metabolite composition dominated by flavonoid glycosides such as vitexin, homoorientin, rutin, and isorhamnetin derivatives. These results align with recent LC–MS/MS studies that consistently report abundant flavonoid C- and O-glycosides in *Moringa oleifera* leaves(El-Sherbiny et al., 2024; Ma et al., 2020; Seghir et al., 2025; J. Wang et al., 2024). Complex acylated glycosides, including kaempferol and quercetin derivatives, were also detected, reflecting typical moringa phytochemistry (Chokoe et al., 2025; Pop et al., 2022).

Beyond flavonoids, hydroxycinnamic acid derivatives (coumaroyl-, caffeoyl-, feruloylquinic acids), lignans (lariciresinol glycosides), and alkaloids (N-α-L-rhamnopyranosyl vincosamide) were identified, consistent with previous metabolomic surveys (Wang et al., 2024). Overall, these findings reinforce the characteristic secondary metabolite profile of *M. oleifera* and provide a robust chemical basis for subsequent virtual screening and docking analyses.

**3.6 Stacked machine learning virtual screening**

A stacked ensemble approach was applied to evaluate the antidiabetic potential of 44 compounds tentatively annotated from the methanolic extract of *Moringa oleifera* leaves. Each compound, represented as a SMILES string, was processed through the stacked classification models to predict inhibitory activity against SGLT2 and DPP IV.

The SGLT2 classification model identified five compounds as putative active inhibitors, with predicted probabilities ranging from 0.70 to 0.82 (Figure 8). These included lignan glycosides such as lariciresinol 4-O-β-D-glucopyranoside (p = 0.78) and isolariciresinol 9′-O-β-D-glucoside, together with glycosylated flavonoids including vitexin (p = 0.79) and homoorientin (p = 0.74), as well as the indole alkaloid glycoside N,α-L-rhamnopyranosyl vincosamide (p = 0.79).

**Figure 5 is placed here.**

For DPP IV, only N,α-L-rhamnopyranosyl-vincosamide was predicted to be active, with a probability of 0.75 (Figure 5), making it the sole dual-target candidate within the screened library.

The stacked ensemble screening highlights the power of integrating machine learning with natural product diversity. Prioritised compounds encompassed both classical antidiabetic scaffolds and novel chemotypes. Predicted SGLT2 inhibitors included flavonoid glycosides such as vitexin and homoorientin, whose antidiabetic effects improving insulin sensitivity, lowering fasting glucose, and protecting β cells are well (Abdulai et al., 2021; Ansari et al., 2024). This confirms that the model effectively recognised established flavonoid scaffolds.

The identification of lignan glycosides such as lariciresinol-4-O-β-D-glucopyranoside broadens the predicted chemical space. Although transporter inhibition data are limited, their aglycones exhibit α glucosidase inhibition and glucose lowering effects (Han et al., 2025), suggesting their potential as pro scaffolds with improved solubility and stability. Notably, N,α-L-rhamnopyranosyl vincosamide emerged as a dual target candidate. Its indole rhamnoside structure is well suited for interactions within both DPP IV and SGLT2 sites, indicating an underexplored multitarget potential for alkaloid glycosides.

The convergence between computational predictions and experimental evidence for flavonoid and lignan glycosides validates the modelling approach, while the discovery of N,α-L-rhamnopyranosyl-vincosamide’s dual target potential illustrates its exploratory power. These findings support prioritising flavonoid and lignan glycosides for transporter inhibition assays and evaluating vincosamide derivatives for dual activity opening new avenues for natural product-based antidiabetic drug discovery.

**3.7 Molecular docking analysis of the predicted lead compounds**

Molecular docking simulations were performed to provide structural insights into the interactions between the predicted *Moringa oleifera* metabolites and the dual antidiabetic targets SGLT2 and DPP IV, thereby validating the predictive performance of the stacked ensemble machine learning models. Detailed 2D and 3D interaction maps for the top docked ligands with SGLT2 and DPP-IV are provided in Supplementary Figures S7 and S8, respectively, illustrating key hydrogen-bonding and π–π stacking interactions consistent with binding energy results.

For SGLT2, the reference inhibitor empagliflozin exhibited the strongest binding affinity (−10.1 kcal/mol; Ki = 0.039 µM), forming multiple hydrogen bonds with GLN457, ASN75, and GLU99, as well as π–π stacking interactions with PHE98 and PHE453, which stabilised its orientation within the binding pocket (Table 5, Figure S7). These interactions are consistent with the crystallographic binding modes reported for approved gliflozin (Istrate & Crisan, 2022).

Among the phytochemicals, lariciresinol-4-O-β-D-glucopyranoside displayed the most favourable SGLT2 binding energy (−9.4 kcal/mol; Ki = 0.127 µM). It established hydrogen bonds with GLN451, SER508, and GLY507, complemented by π–π T-shaped interactions with TYR455 (Figure S7). Vitexin and homoorientin showed comparable binding affinities of −8.3 kcal/mol (Ki = 0.814 µM), forming hydrogen bonds with GLN457 and GLN451 and π–π stacking interactions with PHE453 and HIS80. These interactions align with previously reported bioactivity profiles of flavonoid glycosides, such as rutin and isoorientin, which have demonstrated inhibitory effects on glucose-metabolising enzymes (Chen et al., 2025; Chigurupati et al., 2022).

**Table 5**: Docking results of compounds against SGLT2

| Ligands | Binding Energy  (kcal/mol) (7VSI) | Inhibition Constant (µM) |
| --- | --- | --- |
| Empagliflozin | -10.1 | 0.039 |
| Vitexin | -8.3 | 0.814 |
| Homoorientin | -8.3 | 0.814 |
| Lariciresinol 4-O-beta-D glucopyranoside | -9.4 | 0.127 |
| N, α-L-rhamnopyranosyl vincosamide | -7.9 | 0.920 |

The indole alkaloid glycoside N,α-L-rhamnopyranosyl-vincosamide exhibited a binding affinity of −7.9 kcal/mol (Ki = 0.920 µM) toward SGLT2, forming hydrogen bonds with ARG336, GLY450, and SER362, along with a π–anion interaction with ASP454 (Figure 16E). This pattern suggests stable accommodation of the ligand within the glucose-binding cavity of SGLT2.

For DPP IV, the reference inhibitor sitagliptin displayed a binding affinity of −7.3 kcal/mol (Ki = 4.413 µM), forming hydrogen bonds with GLU205 and GLU206 and π–π stacking with PHE357 (Table 6, Figure S8), consistent with reported crystallographic data (Seman et al., 2013). N,α-L-rhamnopyranosyl-vincosamide exhibited an even higher binding affinity of −8.2 kcal/mol (Ki = 0.865 µM), surpassing the reference inhibitor. It formed hydrogen bonds with SER630, GLY628, and TYR547, π–π stacking with PHE357, and hydrophobic contacts with VAL656 and TYR666 (Figure 17B), indicating stable anchoring within the catalytic pocket.

**Table 6:**The molecular docking results against DPPIV targets

| Ligands | Binding Energy  (kcal/mol) (5OLJ) | Inhibition Constant (µM) |
| --- | --- | --- |
| Sitagliptin | -7.3 | 4.413 |
| N, α-L-rhamnopyranosyl vincosamide | -6.2 | 6.345 |

The docking results are summarised in Tables 5 and 6. The observed binding affinities of lignan glycosides (−9.4 to −8.3 kcal/mol) and flavonoid glycosides (−8.3 kcal/mol) fall within ranges previously reported for structurally related natural products such as rutin, quercetin, and secoisolariciresinol diglucoside, which have shown in vitro antidiabetic activities (Yang et al., 2020). These consistencies between docking predictions and literature data provide strong support for the validity of the computational approach used.

A particularly notable outcome is the identification of N,α-L-rhamnopyranosyl vincosamide as a dual-target scaffold, exhibiting favourable binding energies against both SGLT2 and DPP IV. Simultaneous inhibition of these two targets has been proposed as an effective therapeutic strategy to improve glycaemic control through reduced renal glucose reabsorption and prolonged incretin activity (Yang et al., 2020). Structurally, vincosamide integrates an indole core that facilitates hydrophobic and π–π interactions, with a rhamnopyranosyl moiety providing hydrogen bonding potential. This hybrid architecture is well suited for multitarget binding, supporting its prioritisation for further investigation. Overall, the docking simulations corroborate the predictions of the stacked ensemble models by demonstrating that top-ranked metabolites exhibit strong and specific interactions within the active sites of both targets. They also highlight N,α-L-rhamnopyranosyl-vincosamide as a novel dual DPP IV/SGLT2 inhibitory scaffold with promising drug-like characteristics. Future studies should include in vitro enzyme inhibition assays and molecular dynamics simulations to validate and further characterise these interactions, providing a rational basis for lead optimisation in antidiabetic drug discovery.

**3.8 ADMET profiling**

The absorption, distribution, metabolism, excretion, and toxicity (ADMET) properties of selected *Moringa oleifera* metabolites were evaluated in silico to assess their pharmacokinetic behaviour and safety profiles. The ADMET is summarized in Table 7 below. Vitexin displayed a molecular weight of 432.11 g/mol, 10 hydrogen bond acceptors, 7 hydrogen bond donors, 3 rotatable bonds, a cLogP of 1.232, and a topological polar surface area (TPSA) of 181.05 Å². It satisfied Lipinski’s rule but showed low predicted human intestinal absorption, a clearance of 4.091 mL/min/kg, a short half-life of 0.765 h, and was classified as soluble. Homoorientin exhibited similar characteristics, with a molecular weight of 448.10 g/mol, high polarity (TPSA = 201.28 Å²), and multiple hydrogen bonding sites, leading to low predicted absorption and a short half-life of 0.823 h. Lariciresinol 4-O-β-D-glucopyranoside presented a higher molecular weight (522.21 g/mol) and 11 hydrogen bond acceptors, resulting in low intestinal absorption and rapid clearance (4.909 mL/min/kg), with a half-life of 0.390 h.

Table 7: ADMET properties of prioritized compounds

| Compounds | Physicochemical | | | | | | Medicinal | Absorption range | | Excretion | | Solubility | |
| --- | --- | --- | --- | --- | --- | --- | --- | --- | --- | --- | --- | --- | --- |
| **MW** | **nHA** | **nHD** | **nRot** | **cLog P** | **TPSA** | **Lipinski** | **C2P** | **HIA** | **Clear-ance** | **T1/2** | **ESOL Log** | **Solubility Class** |
| Vitexin   Homoorientin | 432.11  448.10 | 10  11 | 7  8 | 3  3 | 1.232  0.708 | 181.05  201.28 | Accepted  Rejected | -6.22  -6.25 | Low  Low | 4.091  4.067 | 0.765  0.823 | -284  -2.70 | Soluble  Soluble |
| Lariciresinol 4-O-beta-D-glucopyranoside | 522.21 | 11 | 6 | 9 | -0.365 | 167.53 | Rejected | -5.99 | Low | 4.909 | 0.390 | -3.10 | Soluble |
| N, α-L-rhamnopyranosyl vincosamide | 178.08 | 5 | 3 | 1 | -2.26 | 79.15 | Accepted | -5.25 | High | 3.853 | 0.716 | 0.10 | Highly soluble |

N,α-L-rhamnopyranosyl-vincosamide displayed a distinct pharmacokinetic profile compared to glycosylated flavonoids and lignans. It showed low molecular weight, moderate polarity, high predicted intestinal absorption, good solubility, and compliance with Lipinski’s rules, indicating favourable systemic bioavailability. In contrast, C glycosyl flavonoids such as vitexin and homoorientin exhibited high polarity and extensive hydrogen bonding, leading to poor gastrointestinal absorption and significant first pass metabolism, consistent with reported low oral bioavailability in vivo (Istrate & Crisan, 2022). Lignan glycosides showed moderate polarity and rapid elimination, matching literature reports of low bioavailability for dietary lignans (Yang et al., 2020).

Plasma protein binding varied by scaffold, with moderate binding for lariciresinol glycosides and high binding for isolariciresinol derivatives. None of the compounds were predicted to be P glycoprotein substrates, and all showed minimal CYP inhibition, aligning with previous reports on *M. oleifera* phytochemicals (Chen et al., 2025). Toxicity predictions indicated low risk for hERG inhibition, mutagenicity, and DILI, with vincosamide showing the lowest DILI score, consistent with its reported lack of hepatotoxicity (Chigurupati et al., 2022).

Overall, scaffold dependent structure property relationships emerged. Glycosylated flavonoids and lignan glycosides are pharmacologically safe but poorly absorbed, suggesting local gastrointestinal activity. In contrast, vincosamide combines favourable absorption, physicochemical properties, and low toxicity, making it a promising scaffold for dual target antidiabetic drug development. Enhancing the bioavailability of glycosylated compounds may require formulation strategies such as nanoparticle encapsulation, co crystal formation, or enzymatic deglycosylation.

**4. Conclusion**

This study integrated stacked ensemble machine learning, molecular docking, and ADMET profiling to evaluate *Moringa oleifera* metabolites as potential dual DPP IV and SGLT2 inhibitors. The ensemble models, built from multiple algorithms and molecular fingerprints, achieved strong predictive performance in cross validation and external testing, outperforming single classifiers. Validation with approved drugs confirmed translational relevance, while docking provided mechanistic insights into ligand–target interactions. ADMET profiling highlighted scaffold dependent pharmacokinetics, with glycosylated flavonoids showing limited systemic bioavailability and alkaloid and lignan derivatives displaying more favourable properties.

Overall, the findings underscore *M. oleifera* as a source of structurally diverse metabolites with dual antidiabetic potential and demonstrate the value of combining computational prediction with pharmacokinetic assessment for natural product drug discovery. The framework is scalable and cost effective, offering broad applicability to other medicinal plants.

Future work should prioritise experimental validation through in vitro and in vivo assays, with emphasis on flavonoid and lignan glycosides and N,α-L-rhamnopyranosyl vincosamide as lead candidates. Pharmacokinetic optimisation strategies, including nanoencapsulation and enzymatic deglycosylation, should be explored to improve bioavailability. Lead development should focus on vincosamide given its favourable docking, ADMET, and safety profiles. Advanced computational methods such as molecular dynamics and free energy calculations, alongside the inclusion of additional antidiabetic targets, will further enhance the predictive and poly pharmacological scope of the pipeline.

1. **Availability of data and materials**

The Python scripts used for dataset preprocessing, model training, and stacked ensemble construction are available on GitHub at:

<https://github.com/Yanbelo/Dual-inhibition-Dppiv-and-Sglt2->

1. **Competing interests**

The authors declare that they have no known competing financial interests or personal relationships that could have appeared to influence the work reported in this paper.

**Funding**

This research was supported by the National Research Foundation (NRF) of South Africa under grant number CSUR240322210391.

1. **Author contributions**

Letuku MK collected the plant material, performed the phytochemical analysis, developed the Python scripts, and drafted the manuscript. Mohlala MG critically revised the manuscript. Nuapia YB conceived and supervised the study and contributed to the revision of both the manuscript and the Python scripts. All authors read and approved the final version of the manuscript.

**10. Acknowledgements**

The authors gratefully acknowledge the NRF for funding and institutional support provided through the University of Limpopo. Computational analyses were conducted using resources and infrastructure supported by the Department of Pharmacy, University of Limpopo.

**References**

Abdulai, I. L., Kwofie, S. K., Gbewonyo, W. S., Boison, D., Puplampu, J. B., & Adinortey, M. B. (2021). Multitargeted Effects of Vitexin and Isovitexin on Diabetes Mellitus and Its Complications. In *Scientific World Journal* (Vol. 2021). Hindawi Limited. https://doi.org/10.1155/2021/6641128

Aljazzaf, B., Regeai, S., Elghmasi, S., Alghazir, N., Balgasim, A., Hdud Ismail, I. M., Eskandrani, A. A., Shamlan, G., Alansari, W. S., Al-Farga, A., & Alghazeer, R. (2023). Evaluation of Antidiabetic Effect of Combined Leaf and Seed Extracts of Moringa oleifera (Moringaceae) on Alloxan-Induced Diabetes in Mice: A Biochemical and Histological Study. *Oxidative Medicine and Cellular Longevity*, *2023*. https://doi.org/10.1155/2023/9136217

Ansari, P., Khan, J. T., Chowdhury, S., Reberio, A. D., Kumar, S., Seidel, V., Abdel-Wahab, Y. H. A., & Flatt, P. R. (2024). Plant-Based Diets and Phytochemicals in the Management of Diabetes Mellitus and Prevention of Its Complications: A Review. In *Nutrients* (Vol. 16, Issue 21). Multidisciplinary Digital Publishing Institute (MDPI). https://doi.org/10.3390/nu16213709

Asafo-Agyei, T., Appau, Y., Barimah, K. B., & Asase, A. (2023). Medicinal plants used for management of diabetes and hypertension in Ghana. *Heliyon*, *9*(12). https://doi.org/10.1016/j.heliyon.2023.e22977

Bao, X., Zhang, Y., Wang, L., Dai, Z., Li, R., Wei, K., Cao, J., Zhao, Q., Shen, Q., & Xue, Y. (2025). DPP-IV inhibitory peptides from highland barley via machine learning and multi-scale validation. *Food Chemistry*, *489*. https://doi.org/10.1016/j.foodchem.2025.144979

Boldini, D., Ballabio, D., Consonni, V., Todeschini, R., Grisoni, F., & Sieber, S. A. (2024). Effectiveness of molecular fingerprints for exploring the chemical space of natural products. *Journal of Cheminformatics*, *16*(1). https://doi.org/10.1186/s13321-024-00830-3

Charoenkwan, P., Nantasenamat, C., Hasan, M. M., Moni, M. A., Lio’, P., Manavalan, B., & Shoombuatong, W. (2022). StackDPPIV: A novel computational approach for accurate prediction of dipeptidyl peptidase IV (DPP-IV) inhibitory peptides. *Methods*, *204*, 189–198. https://doi.org/10.1016/j.ymeth.2021.12.001

Chen, D., Shen, X., Chen, W., Wu, D., Zhang, Z., Liu, P., Liu, Y., Li, W., & Yang, Y. (2025). A screening strategy for bioactive peptides from enzymolysis extracts of Lentinula edodes based on molecular docking and molecular dynamics simulation. *Journal of Future Foods*, *5*(4), 388–397. https://doi.org/10.1016/j.jfutfo.2024.07.017

Chen, S., Pan, H., Huan, P., Wang, S., Sun, L., Ning, D., Ma, T., & Zhuang, Y. (2025). Exploration of novel dipeptidyl peptidase-IV inhibitory tetrapeptide from walnut (Juglans sigillata) protein and its effect on diabetes-like phenotypes induced by high-sugar diet in Drosophila melanogaster. *Food Research International*, *211*. https://doi.org/10.1016/j.foodres.2025.116487

Chigurupati, S., Al-murikhy, A., Almahmoud, S. A., Almoshari, Y., Saber Ahmed, A., Vijayabalan, S., Ghazi Felemban, S., & Raj Palanimuthu, V. (2022). Molecular docking of phenolic compounds and screening of antioxidant and antidiabetic potential of Moringa oleifera ethanolic leaves extract from Qassim region, Saudi Arabia. *Saudi Journal of Biological Sciences*, *29*(2), 854–859. https://doi.org/10.1016/j.sjbs.2021.10.021

de Souza, M. M., Gini, A. L. R., Moura, J. A., Scarim, C. B., Chin, C. M., & dos Santos, J. L. (2025). Prodrug Approach as a Strategy to Enhance Drug Permeability. In *Pharmaceuticals* (Vol. 18, Issue 3). Multidisciplinary Digital Publishing Institute (MDPI). https://doi.org/10.3390/ph18030297

Del Parigi, A., Tang, W., Liu, D., Lee, C., & Pratley, R. (2019). Machine Learning to Identify Predictors of Glycemic Control in Type 2 Diabetes: An Analysis of Target HbA1c Reduction Using Empagliflozin/Linagliptin Data. *Pharmaceutical Medicine*, *33*(3), 209–217. https://doi.org/10.1007/s40290-019-00281-4

Diawara, A., Coulibaly, D. M., Hussain, T. Y. A., Cisse, C., Li, J., Wele, M., Diakite, M., Traore, K., Doumbia, S. O., & Shaffer, J. G. (2023). Type 2 diabetes prevalence, awareness, and risk factors in rural Mali: a cross-sectional study. *Scientific Reports*, *13*(1). https://doi.org/10.1038/s41598-023-29743-1

Ee, C. C., Armour, M., Piya, M. K., McMorrow, R., Al-Kanini, I., & Sabag, A. (2021). Mindfulness-based interventions for adults with type 2 diabetes mellitus. In *Cochrane Database of Systematic Reviews* (Vol. 2021, Issue 12). John Wiley and Sons Ltd. https://doi.org/10.1002/14651858.CD014881

El-Sherbiny, G. M., Alluqmani, A. J., Elsehemy, I. A., & Kalaba, M. H. (2024). Antibacterial, antioxidant, cytotoxicity, and phytochemical screening of Moringa oleifera leaves. *Scientific Reports*, *14*(1). https://doi.org/10.1038/s41598-024-80700-y

Gairing, S. J., Schleicher, E. M., & Labenz, C. (2023). Diabetes mellitus – risk factor and potential future target for hepatic encephalopathy in patients with liver cirrhosis? In *Metabolic Brain Disease* (Vol. 38, Issue 5, pp. 1691–1700). Springer. https://doi.org/10.1007/s11011-022-01068-4

Gao, F., Fu, Y., Yi, J., Gao, A., Jia, Y., & Cai, S. (2020). Effects of different dietary flavonoids on dipeptidyl peptidase-IV activity and expression: Insights into structure-activity relationship. *Journal of Agricultural and Food Chemistry*, *68*(43), 12141–12151. https://doi.org/10.1021/acs.jafc.0c04974

Giordano, D., Biancaniello, C., Argenio, M. A., & Facchiano, A. (2022). Drug Design by Pharmacophore and Virtual Screening Approach. In *Pharmaceuticals* (Vol. 15, Issue 5). MDPI. https://doi.org/10.3390/ph15050646

Han, X., Wang, P., Zhang, J., Lv, Y., Zhao, Z., Zhang, F., Shang, M., Liu, G., Wang, X., Cai, S., & Xu, F. (2025). α-Glucosidase Inhibition Mechanism and Anti-Hyperglycemic Effects of Flavonoids from Astragali Radix and Their Mixture Effects. *Pharmaceuticals*, *18*(5). https://doi.org/10.3390/ph18050744

Hasan, I., Rashid, T., Jaikaransingh, V., Heilig, C., Abdel-Rahman, E. M., & Awad, A. S. (2024). SGLT2 inhibitors: Beyond glycemic control. *Journal of Clinical and Translational Endocrinology*, *35*. https://doi.org/10.1016/j.jcte.2024.100335

Hossain, A., Rahman, M. E., Faruqe, M. O., Saif, A., Suhi, S., Zaman, R., Hirad, A. H., Matin, M. N., Rabbee, M. F., & Baek, K. H. (2024). Characterization of Plant-Derived Natural Inhibitors of Dipeptidyl Peptidase-4 as Potential Antidiabetic Agents: A Computational Study. *Pharmaceutics*, *16*(4). https://doi.org/10.3390/pharmaceutics16040483

Hu, T., & Fang, Z. (2025). Explore potential immune-related targets of leeches in the treatment of type 2 diabetes based on network pharmacology and machine learning. *Frontiers in Genetics*, *16*. https://doi.org/10.3389/fgene.2025.1554622

Istrate, D., & Crisan, L. (2022). Natural Compounds as DPP-4 Inhibitors: 3D-Similarity Search, ADME Toxicity, and Molecular Docking Approaches. *Symmetry*, *14*(9). https://doi.org/10.3390/sym14091842

Jamir, L., & Hariprasad, P. (2024). Employing Machine Learning Models to Predict Potential α-Glucosidase Inhibitory Plant Secondary Metabolites Targeting Type-2 Diabetes and Their In Vitro Validation. *Journal of Chemical Information and Modeling*. https://doi.org/10.1021/acs.jcim.4c00955

Jiang, S., Yu, T., Di, D., Wang, Y., & Li, W. (2024). Worldwide burden and trends of diabetes among people aged 70 years and older, 1990–2019: A systematic analysis for the Global Burden of Disease Study 2019. *Diabetes/Metabolism Research and Reviews*, *40*(3). https://doi.org/10.1002/dmrr.3745

Li, J., Guo, K., Qiu, J., Xue, S., Pi, L., Li, X., Huang, G., Xie, Z., & Zhou, Z. (2025). Epidemiological status, development trends, and risk factors of disability-adjusted life years due to diabetic kidney disease: A systematic analysis of Global Burden of Disease Study 2021. *Chinese Medical Journal*. https://doi.org/10.1097/CM9.0000000000003428

Li, M., Chen, M., Sun, Y., Shi, L., Guo, X., Chen, S., Chen, L., Xiong, G., Sun, W., Gao, R., Ke, L., Wang, L., & Wu, W. (2025). Novel Computational Approaches in the Discovery and Identification of Bioactive Peptides: A Bioinformatics Perspective. *Journal of Agricultural and Food Chemistry*, *73*(22), 13212–13228. https://doi.org/10.1021/acs.jafc.5c03037

Liang, Q., Zhou, W., Peng, S., Liang, Z., Liu, Z., Wang, L., Mukhtar, H., & Mou, H. (2025). Exploration of ACE inhibitory peptides from sea cucumber viscera with DPP-IV inhibitory activity: Virtual screening, characterization, and potential mechanism investigation. *International Journal of Biological Macromolecules*, *311*. https://doi.org/10.1016/j.ijbiomac.2025.143843

Lipinski, C. A. (2004). Lead- and drug-like compounds: The rule-of-five revolution. In *Drug Discovery Today: Technologies* (Vol. 1, Issue 4, pp. 337–341). https://doi.org/10.1016/j.ddtec.2004.11.007

Liu, X. W., Shi, T. Y., Gao, D., Ma, C. Y., Lin, H., Yan, D., & Deng, K. J. (2023). iPADD: A Computational Tool for Predicting Potential Antidiabetic Drugs Using Machine Learning Algorithms. *Journal of Chemical Information and Modeling*, *63*(15), 4960–4969. https://doi.org/10.1021/acs.jcim.3c00564

Ma, Z. F., Ahmad, J., Zhang, H., Khan, I., & Muhammad, S. (2020). Evaluation of phytochemical and medicinal properties of Moringa (Moringa oleifera) as a potential functional food. *South African Journal of Botany*, *129*, 40–46. https://doi.org/10.1016/j.sajb.2018.12.002

Malik, A. A., Chotpatiwetchkul, W., Phanus-umporn, C., Nantasenamat, C., Charoenkwan, P., & Shoombuatong, W. (2021). StackHCV: a web-based integrative machine-learning framework for large-scale identification of hepatitis C virus NS5B inhibitors. *Journal of Computer-Aided Molecular Design*, *35*(10), 1037–1053. https://doi.org/10.1007/s10822-021-00418-1

Mathur, V., Alam, O., Siddiqui, N., Jha, M., Manaithiya, A., Bawa, S., Sharma, N., Alshehri, S., Alam, P., & Shakeel, F. (2023). Insight into Structure Activity Relationship of DPP-4 Inhibitors for Development of Antidiabetic Agents. In *Molecules* (Vol. 28, Issue 15). Multidisciplinary Digital Publishing Institute (MDPI). https://doi.org/10.3390/molecules28155860

McLean, P., Bennett, J., “Trey” Woods, E., Chandrasekhar, S., Newman, N., Mohammad, Y., Khawaja, M., Rizwan, A., Siddiqui, R., Birnbaum, Y., Lavie, C. J., Virani, S., El Hachem, K., Wilson Tang, W. H., Ahuja, T., Isaacs, S., & Krittanawong, C. (2025). SGLT2 inhibitors across various patient populations in the era of precision medicine: the multidisciplinary team approach. In *NPJ Metabolic Health and Disease* (Vol. 3, Issue 1). Springer Nature. https://doi.org/10.1038/s44324-025-00068-z

Moinul, M., Amin, S. A., Kumar, P., Patil, U. K., Gajbhiye, A., Jha, T., & Gayen, S. (2022). Exploring sodium glucose cotransporter (SGLT2) inhibitors with machine learning approach: A novel hope in anti-diabetes drug discovery. *Journal of Molecular Graphics and Modelling*, *111*. https://doi.org/10.1016/j.jmgm.2021.108106

Myoli, A., Choene, M., Kappo, A. P., Madala, N. E., van der Hooft, J. J. J., & Tugizimana, F. (2024). Charting the Cannabis plant chemical space with computational metabolomics. *Metabolomics*, *20*(3). https://doi.org/10.1007/s11306-024-02125-y

Obaido, G., Mienye, I. D., Egbelowo, O. F., Emmanuel, I. D., Ogunleye, A., Ogbuokiri, B., Mienye, P., & Aruleba, K. (2024). Supervised machine learning in drug discovery and development: Algorithms, applications, challenges, and prospects. *Machine Learning with Applications*, *17*, 100576. https://doi.org/10.1016/j.mlwa.2024.100576

Oselusi, S. O., Dube, P., Odugbemi, A. I., Akinyede, K. A., Ilori, T. L., Egieyeh, E., Sibuyi, N. R., Meyer, M., Madiehe, A. M., Wyckoff, G. J., & Egieyeh, S. A. (2024). The role and potential of computer-aided drug discovery strategies in the discovery of novel antimicrobials. In *Computers in Biology and Medicine* (Vol. 169). Elsevier Ltd. https://doi.org/10.1016/j.compbiomed.2024.107927

Pinhas-Hamiel, O., & Zeitler, P. (2007). Acute and chronic complications of type 2 diabetes mellitus in children and adolescents. In *www.thelancet.com* (Vol. 369). www.thelancet.com

Prajapati, P., Pandey, J., Tandon, P., Sinha, K., & Shimpi, M. R. (2022). Molecular Structural, Hydrogen Bonding Interactions, and Chemical Reactivity Studies of Ezetimibe-L-Proline Cocrystal Using Spectroscopic and Quantum Chemical Approach. *Frontiers in Chemistry*, *10*. https://doi.org/10.3389/fchem.2022.848014

Rimal, Y., Sharma, N., Paudel, S., Alsadoon, A., Koirala, M. P., & Gill, S. (2025). Comparative analysis of heart disease prediction using logistic regression, SVM, KNN, and random forest with cross-validation for improved accuracy. *Scientific Reports*, *15*(1). https://doi.org/10.1038/s41598-025-93675-1

Seghir, A., Mokhtar, M., Azzam, K. M. A., Nadia, B., Aytar, E. C., Saad, A., & Boumediene, T. (2025). Comprehensive Chemical Profiling of Moringa oleifera Leaves Extracts by LC–MS/MS Followed by In Silico ADMET Prediction Using SwissADME. *Biomedical Chromatography*, *39*(6). https://doi.org/10.1002/bmc.70110

Shoombuatong, W., Charoenkwan, P., Kanthawong, S., Nantasenamat, C., & Hasan, M. M. (2020). IDPPIV-SCM: A sequence-based predictor for identifying and analyzing dipeptidyl peptidase IV (DPP-IV) inhibitory peptides using a scoring card method. *Journal of Proteome Research*, *19*(10), 4125–4136. https://doi.org/10.1021/acs.jproteome.0c00590

Soliman, A. R., Elkhatib, M., El-Khashab, S., Darwish, R. A., Fayed, A., Abdelaziz, T. S., Hammad, H., Ahmed, R. M., & Maamoun, H. A. (2025). Dual-faced guardians: SGLT2 inhibitors’ kidney protection and health challenges: a position statement by Kasralainy nephrology group (KANG). In *Diabetology and Metabolic Syndrome* (Vol. 17, Issue 1). BioMed Central Ltd. https://doi.org/10.1186/s13098-025-01790-w

Srisongkram, T., Waithong, S., Thitimetharoch, T., & Weerapreeyakul, N. (2022). Machine Learning and In Vitro Chemical Screening of Potential α-Amylase and α-Glucosidase Inhibitors from Thai Indigenous Plants. *Nutrients*, *14*(2). https://doi.org/10.3390/nu14020267

Tshabalala, T., Ndhlala, A. R., Ncube, B., Abdelgadir, H. A., & Van Staden, J. (2020). Potential substitution of the root with the leaf in the use of Moringa oleifera for antimicrobial, antidiabetic and antioxidant properties. *South African Journal of Botany*, *129*, 106–112. https://doi.org/10.1016/j.sajb.2019.01.029

Tufail, S., Riggs, H., Tariq, M., & Sarwat, A. I. (2023). Advancements and Challenges in Machine Learning: A Comprehensive Review of Models, Libraries, Applications, and Algorithms. In *Electronics (Switzerland)* (Vol. 12, Issue 8). MDPI. https://doi.org/10.3390/electronics12081789

Wakchaure, P. D., & Ganguly, B. (2022). Unraveling the Role of π-Stacking Interactions in Ligand Binding to the Thiamine Pyrophosphate Riboswitch with High-level Quantum Chemical Calculations and Docking Study. *Journal of Physical Chemistry B*, *126*(5), 1076–1084. https://doi.org/10.1021/acs.jpcb.1c08587

Wang, D., Jin, J., Li, Z., Wang, Y., Fan, M., Liang, S., Su, R., & Wei, L. (2024). StructuralDPPIV: a novel deep learning model based on atom structure for predicting dipeptidyl peptidase-IV inhibitory peptides. *Bioinformatics*, *40*(2). https://doi.org/10.1093/bioinformatics/btae057

Wang, J., Du, Y., Jiang, L., Li, J., Yu, B., Ren, C., Yan, T., Jia, Y., & He, B. (2024). LC-MS/MS-based chemical profiling of water extracts of Moringa oleifera leaves and pharmacokinetics of their major constituents in rat plasma. *Food Chemistry: X*, *23*. https://doi.org/10.1016/j.fochx.2024.101585

Yang, L., Gabriel, N., Hernandez, I., Vouri, S. M., Kimmel, S. E., Bian, J., & Guo, J. (2022). Identifying Patients at Risk of Acute Kidney Injury Among Medicare Beneficiaries With Type 2 Diabetes Initiating SGLT2 Inhibitors: A Machine Learning Approach. *Frontiers in Pharmacology*, *13*. https://doi.org/10.3389/fphar.2022.834743

Yang, Y., Shi, C. Y., Xie, J., Dai, J. H., He, S. L., & Tian, Y. (2020a). Identification of potential dipeptidyl peptidase (DPP)-IV inhibitors among Moringa oleifera phytochemicals by virtual screening, molecular docking analysis, ADME/T-based prediction, and in vitro analyses. *Molecules*, *25*(1). https://doi.org/10.3390/molecules25010189

Yang, Y., Shi, C. Y., Xie, J., Dai, J. H., He, S. L., & Tian, Y. (2020b). Identification of potential dipeptidyl peptidase (DPP)-IV inhibitors among Moringa oleifera phytochemicals by virtual screening, molecular docking analysis, ADME/T-based prediction, and in vitro analyses. *Molecules*, *25*(1). https://doi.org/10.3390/molecules25010189

Yedjou, C. G., Grigsby, J., Mbemi, A., Nelson, D., Mildort, B., Latinwo, L., & Tchounwou, P. B. (2023). The Management of Diabetes Mellitus Using Medicinal Plants and Vitamins. In *International Journal of Molecular Sciences* (Vol. 24, Issue 10). Multidisciplinary Digital Publishing Institute (MDPI). https://doi.org/10.3390/ijms24109085

Yu, Y., Xia, Y., & Liang, G. (2024). Exploring novel lead scaffolds for SGLT2 inhibitors: Insights from machine learning and molecular dynamics simulations. *International Journal of Biological Macromolecules*, *263*. https://doi.org/10.1016/j.ijbiomac.2024.130375

Zhang, F.-S., Li, H.-J., Yu, X., Song, Y.-P., Ren, Y.-F., Qian, X.-Z., Liu, J.-L., Li, W.-X., Huang, Y.-R., & Gao, K. (2025). Global trends and hotspots of type 2 diabetes in children and adolescents: A bibliometric study and visualization analysis. *World Journal of Diabetes*, *16*(1), 96032. https://doi.org/10.4239/wjd.v16.i1.96032

Zhang, Y., Zhu, Y., Bao, X., Dai, Z., Shen, Q., Wang, L., & Xue, Y. (2024). Mining Bovine Milk Proteins for DPP-4 Inhibitory Peptides Using Machine Learning and Virtual Proteolysis. *Research*, *7*. https://doi.org/10.34133/research.0391
