# Supplementary material for: Stacked ensemble learning and in-silico profiling reveal dual DPP-IV and SGLT2 Inhibitors from Moringa oleifera metabolites
Source: Research Square preprint supplement (doi:10.21203/rs.3.rs-7954666/v1), 2025-11-10
Supplement: Supplementary file 2 [file 29d8d331b5908d8279029158.docx]

**Highlights**

- Stacked ensemble learning accurately predicted DPP IV and SGLT2 inhibitors
- Models achieved high Matthews Correlation Coefficients in training and testing
- LC–MS/MS profiling identified bioactive *Moringa oleifera* metabolites
- Docking revealed strong dual binding of N,α-L-rhamnopyranosyl vincosamide
- Integrated ML-docking-ADMET pipeline accelerates natural product drug discovery
