# Supplementary material for: Stacked ensemble learning and in-silico profiling reveal dual DPP-IV and SGLT2 Inhibitors from Moringa oleifera metabolites
Source: Research Square preprint supplement (doi:10.21203/rs.3.rs-7954666/v1), 2025-11-10
Supplement: Supplementary file 3 [file d5466904e4e4a7364c3aefab.docx]

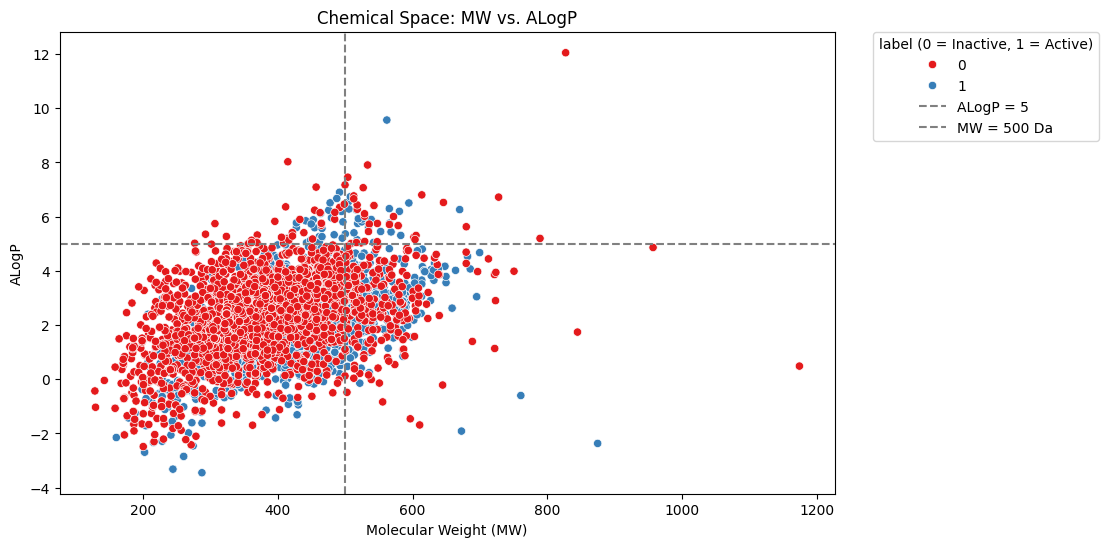


***Figure S1.*** *Chemical space visualization of molecular weight (MW) versus lipophilicity (ALogP) for active and inactive DPP-IV inhibitors. The vertical and horizontal dashed lines represent the Lipinski’s Rule of Five thresholds for MW (500 Da) and ALogP (5), respectively.*


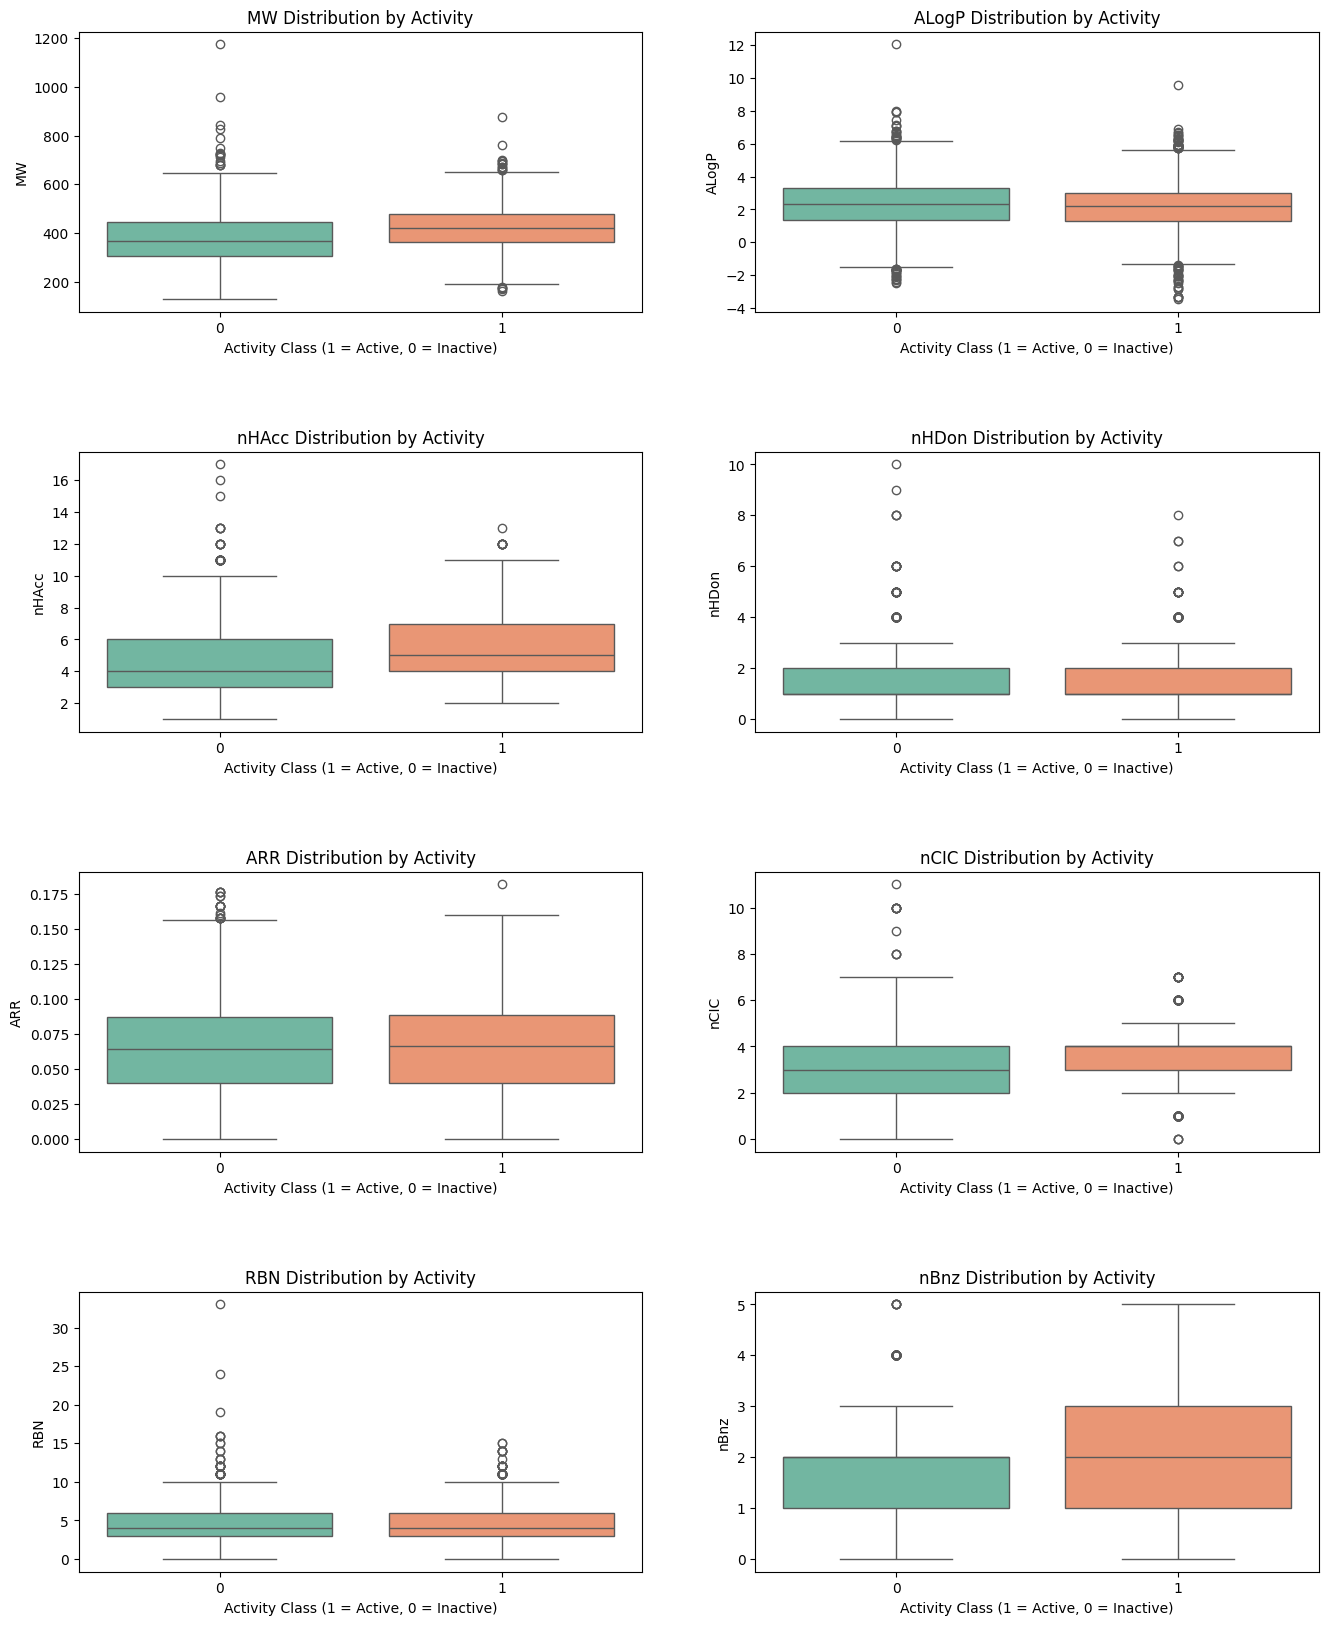


**Figure S2.** Boxplots illustrating the distribution of key Lipinski’s Rule of Five descriptors for active and inactive compounds in the DPP-IV dataset. (a) Molecular weight (MW), (b) ALogP, (c) number of hydrogen bond acceptors (nHAcc), and (d) number of hydrogen bond donors (nHDon). Active compounds generally exhibit higher molecular weight, lower lipophilicity, and increased polarity compared to inactive compounds.


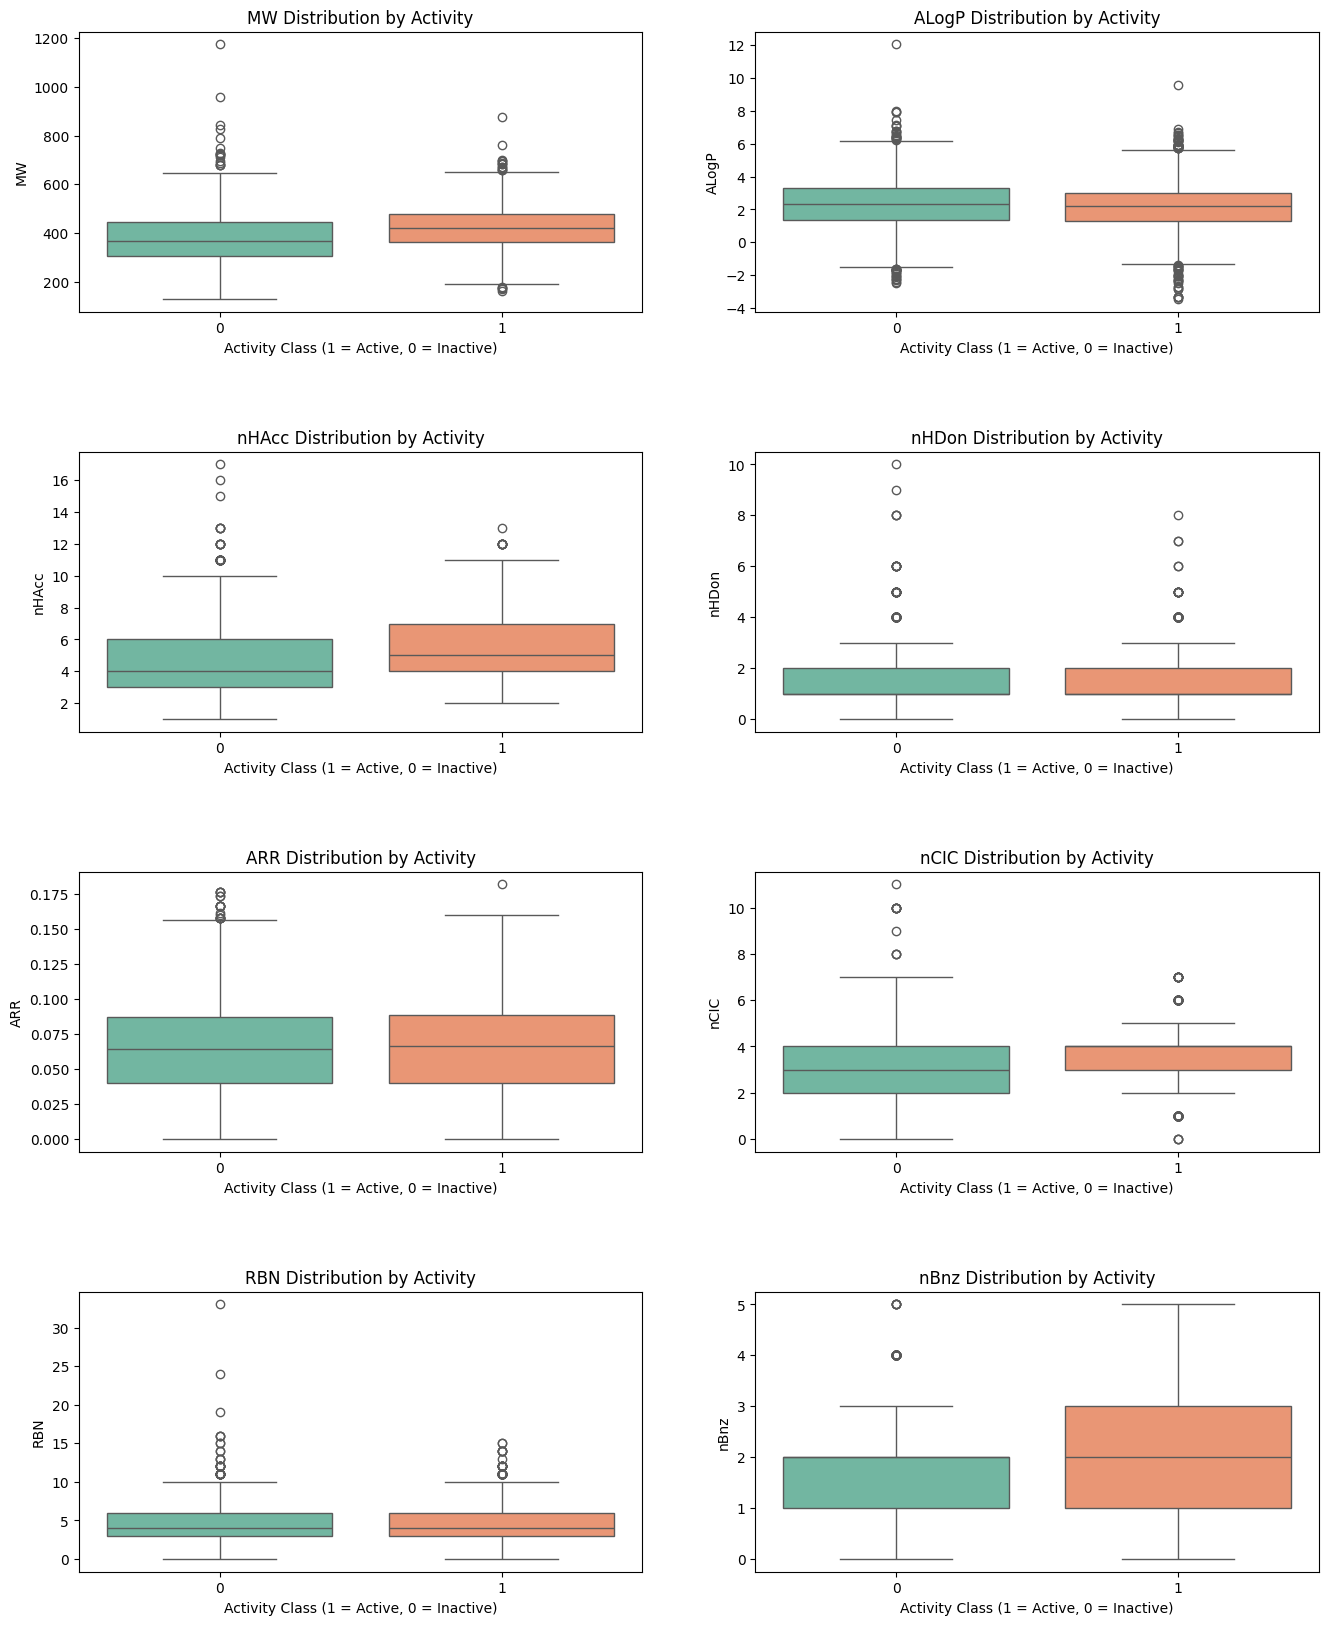


**Figure S3.** Boxplots showing the distribution of molecular complexity descriptors for active and inactive compounds in the DPP-IV dataset. (a) Aromatic atom ratio (ARR), (b) number of chiral centres or rings (nCIC), (c) number of rotatable bonds (RBN), and (d) number of benzene-like rings (nBnz). Active compounds display higher structural complexity, reflected by significantly greater nCIC and nBnz values, compared to inactive compounds.

**
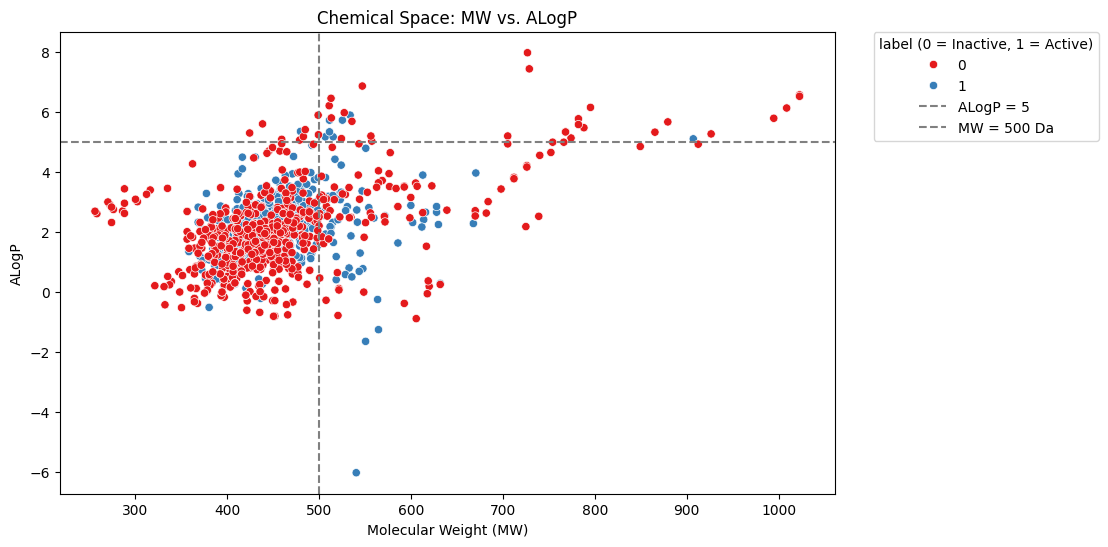
**

**Figure S4.** *Distribution of key physicochemical and structural descriptors between active (1) and inactive (0) SGLT2 inhibitors. Boxplots show molecular weight (MW), lipophilicity (ALogP), number of hydrogen bond acceptors (nHAcc), number of hydrogen bond donors (nHDon), aromatic atom ratio (ARR), number of chiral centres or rings (nCIC), number of rotatable bonds (RBN), and number of benzene-like rings (nBnz).*


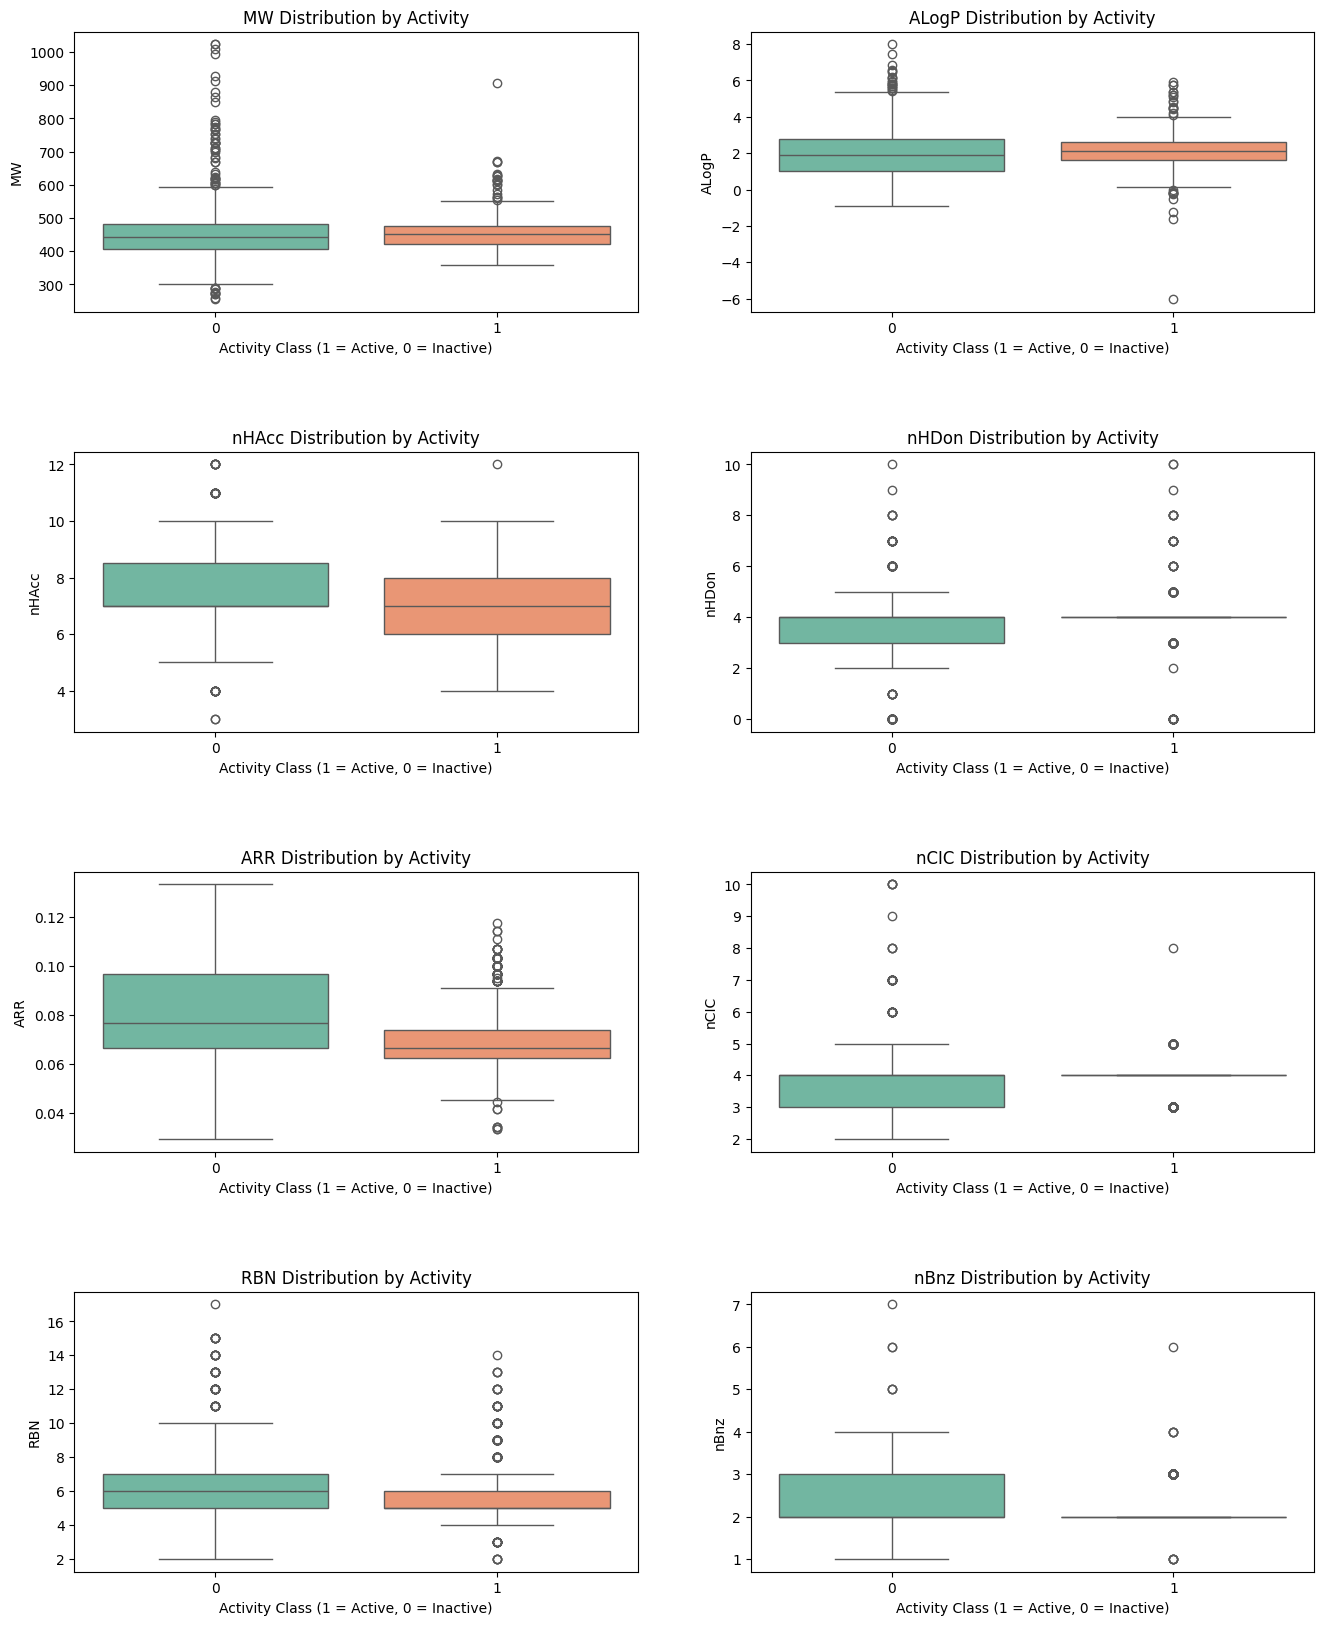


**Figure S5.** Boxplots showing the distribution of key physicochemical descriptors for active and inactive compounds in the SGLT2 dataset. (a) Molecular weight (MW), (b) lipophilicity (ALogP), (c) number of hydrogen bond acceptors (nHAcc), and (d) number of hydrogen bond donors (nHDon). Active SGLT2 inhibitors are generally characterised by moderate molecular weight, balanced lipophilicity, increased hydrogen bond acceptors, and similar hydrogen bond donor counts compared to inactive compounds.


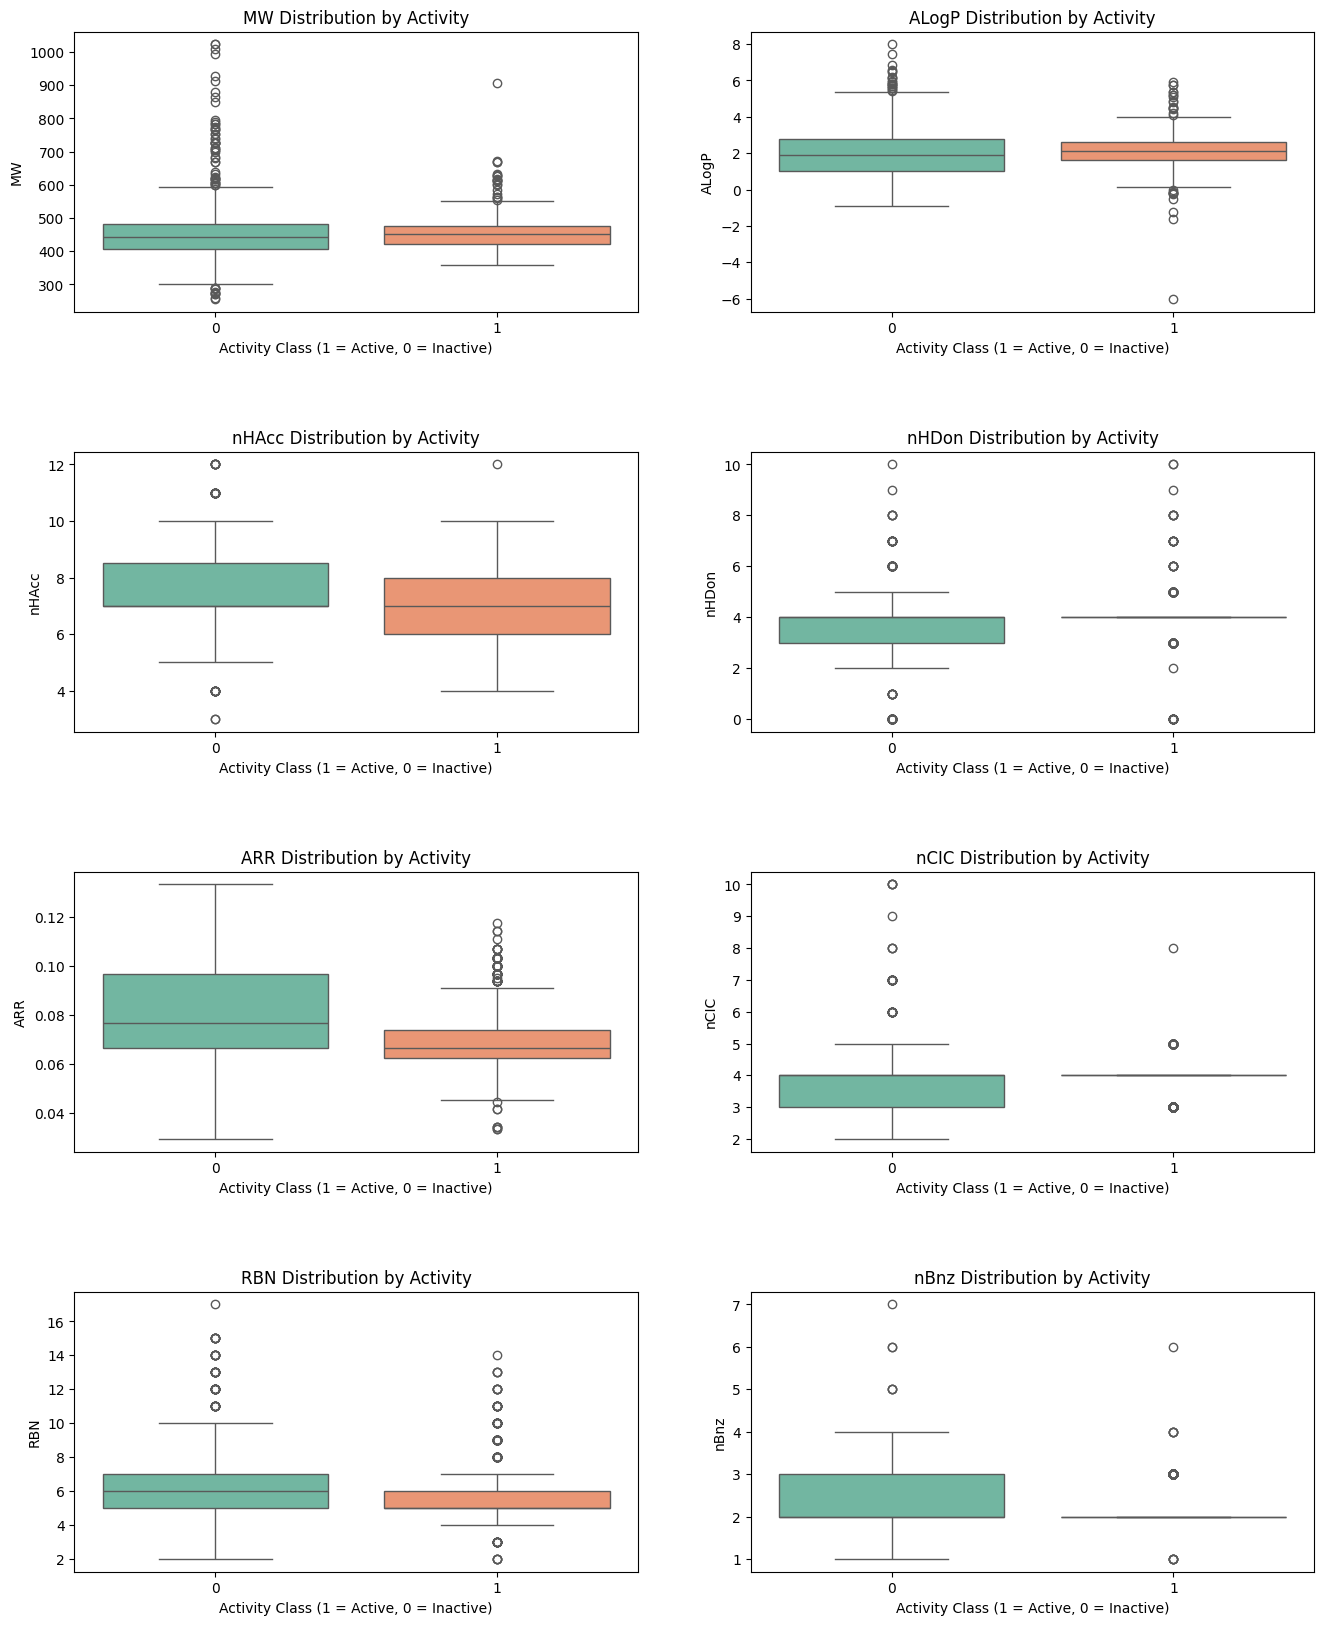


**Figure S6.** Boxplots showing the distribution of molecular complexity descriptors for active and inactive compounds in the SGLT2 dataset. (A) Aromatic atom ratio (ARR), (B) number of chiral centres or rings (nCIC), (C) number of rotatable bonds (RBN), and (D) number of benzene-like rings (nBnz). These descriptors capture variations in aromaticity, rigidity, and structural complexity between active and inactive compounds.

**Table S1**: Hyperparameter Ranges and Final Optimised Values for Baseline Classifiers

| **Algorithm** | **Hyperparameter(s)** | **Tested Range(s)** | **Final Selected Value(s)** |
| --- | --- | --- | --- |
| **Random Forest (RF)** | Number of estimators | 100, 200, 500, 1000 | 500 |
|  | Maximum depth | 5, 10, 20, 30, None | 20 |
|  | Minimum samples per split | 2, 5, 10 | 2 |
| **Support Vector Machine (SVM)** | Kernel type | Linear, RBF, Polynomial | RBF |
|  | C (regularisation parameter) | 0.1, 1, 10, 100 | 10 |
|  | Gamma | Scale, 0.01, 0.001 | Scale |
| **Multi-Layer Perceptron (MLP)** | Hidden layer sizes | (50,), (100,), (50,100), (100,100) | (100,) |
|  | Activation function | ReLU, Tanh, Logistic | ReLU |
|  | Solver | Adam, SGD | Adam |
|  | Learning rate | 0.001, 0.01, 0.1 | 0.001 |
| **XGBoost** | Number of estimators | 100, 200, 500 | 200 |
|  | Max depth | 3, 6, 10 | 6 |
|  | Learning rate (eta) | 0.01, 0.05, 0.1 | 0.05 |
|  | Subsample | 0.6, 0.8, 1.0 | 0.8 |
| **k-Nearest Neighbors (KNN)** | Number of neighbors | 3, 5, 7, 9, 11 | 5 |
|  | Distance metric | Euclidean, Manhattan | Euclidean |
| **Decision Tree (DT)** | Maximum depth | 5, 10, 20, None | 10 |
|  | Criterion | Gini, Entropy | Gini |
| **Gradient Boosting (GB)** | Number of estimators | 100, 200, 500 | 200 |
|  | Learning rate | 0.01, 0.05, 0.1 | 0.05 |
|  | Maximum depth | 3, 6, 10 | 6 |
| **AdaBoost** | Number of estimators | 50, 100, 200 | 100 |
|  | Learning rate | 0.01, 0.1, 1.0 | 1.0 |
| **Naïve Bayes (NB)** | Var smoothing | 1e-9, 1e-8, 1e-7 | 1e-9 |
| **Logistic Regression (LR)** | Penalty | L1, L2 | L2 |
|  | Solver | Liblinear, Saga | Liblinear |
| **Bagging Classifier** | Number of estimators | 10, 50, 100 | 50 |
|  | Base estimator | Decision Tree, Random Forest | Decision Tree |

**Table S2a**: Training performance of DPP-IV classifiers

|  | **AUC** | **Precision** | **Recall** | **F1-Score** | **ROC AUC** | **MCC** | **Balanced Accuracy** | **Kappa** | **Sensitivity** | **Specificity** |
| --- | --- | --- | --- | --- | --- | --- | --- | --- | --- | --- |
| AdaAP2D | 0,93 | 0,91 | 0,94 | 0,93 | 0,93 | 0,86 | 0,93 | 0,86 | 0,94 | 0,92 |
| AdaCDK | 0,85 | 0,83 | 0,86 | 0,84 | 0,85 | 0,70 | 0,85 | 0,70 | 0,86 | 0,84 |
| AdaCDKEXt | 0,91 | 0,88 | 0,94 | 0,90 | 0,91 | 0,82 | 0,91 | 0,81 | 0,94 | 0,88 |
| AdaCDKGraph | 0,89 | 0,88 | 0,90 | 0,89 | 0,90 | 0,79 | 0,90 | 0,79 | 0,90 | 0,89 |
| AdaEstate | 0,68 | 0,67 | 0,63 | 0,65 | 0,67 | 0,35 | 0,67 | 0,35 | 0,63 | 0,72 |
| AdaFP4 | 0,93 | 0,93 | 0,92 | 0,93 | 0,93 | 0,86 | 0,93 | 0,86 | 0,92 | 0,94 |
| AdaFP4C | 0,78 | 0,75 | 0,78 | 0,77 | 0,78 | 0,55 | 0,78 | 0,55 | 0,78 | 0,77 |
| AdaKRC | 0,77 | 0,75 | 0,76 | 0,76 | 0,77 | 0,54 | 0,77 | 0,54 | 0,76 | 0,78 |
| AdaMACCS | 0,52 | 0,49 | 0,99 | 0,66 | 0,54 | 0,18 | 0,54 | 0,08 | 0,99 | 0,10 |
| AdaPubChem | 0,74 | 0,72 | 0,74 | 0,73 | 0,74 | 0,48 | 0,74 | 0,48 | 0,74 | 0,74 |
| BagAP2D | 0,92 | 0,91 | 0,93 | 0,92 | 0,93 | 0,85 | 0,93 | 0,85 | 0,93 | 0,92 |
| BagCDK | 0,97 | 0,96 | 0,98 | 0,97 | 0,97 | 0,94 | 0,97 | 0,94 | 0,98 | 0,97 |
| BagCDKEXt | 0,88 | 0,86 | 0,89 | 0,87 | 0,88 | 0,76 | 0,88 | 0,75 | 0,89 | 0,87 |
| BagCDKGraph | 0,96 | 0,96 | 0,96 | 0,96 | 0,96 | 0,93 | 0,96 | 0,93 | 0,96 | 0,96 |
| BagEstate | 0,97 | 0,96 | 0,97 | 0,97 | 0,97 | 0,94 | 0,97 | 0,94 | 0,97 | 0,96 |
| BagFP4 | 0,77 | 0,76 | 0,74 | 0,75 | 0,76 | 0,53 | 0,76 | 0,53 | 0,74 | 0,78 |
| BagFP4C | 0,97 | 0,98 | 0,96 | 0,97 | 0,97 | 0,94 | 0,97 | 0,94 | 0,96 | 0,98 |
| BagKRC | 0,89 | 0,86 | 0,92 | 0,89 | 0,89 | 0,78 | 0,89 | 0,78 | 0,92 | 0,87 |
| BagMACCS | 0,87 | 0,85 | 0,87 | 0,86 | 0,87 | 0,74 | 0,87 | 0,74 | 0,87 | 0,86 |
| BagPubChem | 0,63 | 0,62 | 0,57 | 0,60 | 0,63 | 0,26 | 0,63 | 0,26 | 0,57 | 0,69 |
| DTAP2D | 0,92 | 0,90 | 0,93 | 0,92 | 0,92 | 0,84 | 0,92 | 0,84 | 0,93 | 0,91 |
| DTCDK | 0,96 | 0,96 | 0,96 | 0,96 | 0,96 | 0,93 | 0,96 | 0,93 | 0,96 | 0,96 |
| DTCDKEXt | 0,97 | 0,96 | 0,98 | 0,97 | 0,97 | 0,94 | 0,97 | 0,94 | 0,98 | 0,97 |
| DTCDKGraph | 0,88 | 0,85 | 0,89 | 0,87 | 0,88 | 0,75 | 0,88 | 0,75 | 0,89 | 0,86 |
| DTEstate | 0,96 | 0,96 | 0,97 | 0,96 | 0,96 | 0,93 | 0,96 | 0,93 | 0,97 | 0,96 |
| DTFP4 | 0,97 | 0,96 | 0,98 | 0,97 | 0,97 | 0,94 | 0,97 | 0,94 | 0,98 | 0,97 |
| DTFP4C | 0,77 | 0,76 | 0,74 | 0,75 | 0,77 | 0,53 | 0,77 | 0,53 | 0,74 | 0,79 |
| DTKRC | 0,97 | 0,98 | 0,96 | 0,97 | 0,97 | 0,94 | 0,97 | 0,94 | 0,96 | 0,98 |
| DTMACCS | 0,89 | 0,86 | 0,92 | 0,89 | 0,89 | 0,79 | 0,89 | 0,79 | 0,92 | 0,87 |
| DTPubChem | 0,87 | 0,85 | 0,87 | 0,86 | 0,87 | 0,73 | 0,87 | 0,73 | 0,87 | 0,86 |
| GBAP2D | 0,64 | 0,61 | 0,67 | 0,64 | 0,64 | 0,28 | 0,64 | 0,28 | 0,67 | 0,61 |
| GBCDK | 0,92 | 0,90 | 0,93 | 0,91 | 0,92 | 0,84 | 0,92 | 0,84 | 0,93 | 0,91 |
| GBCDKEXt | 0,97 | 0,96 | 0,97 | 0,96 | 0,97 | 0,93 | 0,97 | 0,93 | 0,97 | 0,97 |
| GBCDKGraph | 0,97 | 0,96 | 0,97 | 0,96 | 0,97 | 0,93 | 0,97 | 0,93 | 0,97 | 0,96 |
| GBEstate | 0,87 | 0,84 | 0,88 | 0,86 | 0,87 | 0,73 | 0,87 | 0,73 | 0,88 | 0,85 |
| GBFP4 | 0,95 | 0,94 | 0,95 | 0,94 | 0,95 | 0,90 | 0,95 | 0,90 | 0,95 | 0,95 |
| GBFP4C | 0,95 | 0,93 | 0,96 | 0,95 | 0,95 | 0,90 | 0,95 | 0,90 | 0,96 | 0,94 |
| GBKRC | 0,71 | 0,71 | 0,64 | 0,67 | 0,70 | 0,41 | 0,70 | 0,41 | 0,64 | 0,76 |
| GBMACCS | 0,97 | 0,98 | 0,95 | 0,96 | 0,96 | 0,93 | 0,96 | 0,93 | 0,95 | 0,98 |
| GBPubChem | 0,86 | 0,84 | 0,87 | 0,86 | 0,86 | 0,72 | 0,86 | 0,72 | 0,87 | 0,85 |

| Model | **AUC** | **Precision** | **Recall** | **F1-Score** | **ROC AUC** | **MCC** | **Balanced Accuracy** | **Kappa** | **Sensitivity** | **Specificity** |
| --- | --- | --- | --- | --- | --- | --- | --- | --- | --- | --- |
| KNNAP2D | 0,84 | 0,83 | 0,82 | 0,82 | 0,83 | 0,67 | 0,83 | 0,67 | 0,82 | 0,85 |
| KNNCDK | 0,68 | 0,67 | 0,64 | 0,65 | 0,68 | 0,36 | 0,68 | 0,35 | 0,64 | 0,72 |
| KNNCDKEXt | 0,86 | 0,84 | 0,87 | 0,86 | 0,86 | 0,73 | 0,86 | 0,72 | 0,87 | 0,85 |
| KNNCDKGraph | 0,96 | 0,95 | 0,96 | 0,96 | 0,96 | 0,92 | 0,96 | 0,92 | 0,96 | 0,96 |
| KNNEstate | 0,85 | 0,82 | 0,88 | 0,85 | 0,86 | 0,71 | 0,86 | 0,71 | 0,88 | 0,83 |
| KNNFP4 | 0,80 | 0,78 | 0,81 | 0,79 | 0,80 | 0,60 | 0,80 | 0,60 | 0,81 | 0,79 |
| KNNFP4C | 0,82 | 0,80 | 0,83 | 0,81 | 0,82 | 0,64 | 0,82 | 0,64 | 0,83 | 0,82 |
| KNNKRC | 0,83 | 0,80 | 0,84 | 0,82 | 0,83 | 0,65 | 0,83 | 0,65 | 0,84 | 0,81 |
| KNNMACCS | 0,65 | 0,65 | 0,58 | 0,61 | 0,65 | 0,30 | 0,65 | 0,30 | 0,58 | 0,72 |
| KNNPubChem | 0,85 | 0,84 | 0,86 | 0,85 | 0,85 | 0,71 | 0,85 | 0,71 | 0,86 | 0,85 |
| LRAP2D | 0,75 | 0,72 | 0,77 | 0,75 | 0,75 | 0,51 | 0,75 | 0,51 | 0,77 | 0,74 |
| LRCDK | 0,74 | 0,72 | 0,72 | 0,72 | 0,74 | 0,47 | 0,74 | 0,47 | 0,72 | 0,75 |
| LRCDKEXt | 0,50 | 0,48 | 0,98 | 0,65 | 0,52 | 0,12 | 0,52 | 0,05 | 0,98 | 0,07 |
| LRCDKGraph | 0,65 | 0,63 | 0,61 | 0,62 | 0,65 | 0,29 | 0,65 | 0,29 | 0,61 | 0,68 |
| LREstate | 0,85 | 0,82 | 0,87 | 0,85 | 0,85 | 0,70 | 0,85 | 0,70 | 0,87 | 0,83 |
| LRFP4 | 0,90 | 0,88 | 0,90 | 0,89 | 0,90 | 0,79 | 0,90 | 0,79 | 0,90 | 0,89 |
| LRFP4C | 0,83 | 0,80 | 0,84 | 0,82 | 0,83 | 0,65 | 0,83 | 0,65 | 0,84 | 0,82 |
| LRKRC | 0,87 | 0,85 | 0,88 | 0,87 | 0,87 | 0,75 | 0,87 | 0,75 | 0,88 | 0,86 |
| LRMACCS | 0,85 | 0,84 | 0,84 | 0,84 | 0,85 | 0,70 | 0,85 | 0,70 | 0,84 | 0,86 |
| LRPubChem | 0,65 | 0,68 | 0,51 | 0,58 | 0,65 | 0,30 | 0,65 | 0,30 | 0,51 | 0,78 |
| MLPAP2D | 0,90 | 0,91 | 0,87 | 0,89 | 0,89 | 0,79 | 0,89 | 0,79 | 0,87 | 0,92 |
| MLPCDK | 0,77 | 0,76 | 0,76 | 0,76 | 0,77 | 0,55 | 0,77 | 0,55 | 0,76 | 0,78 |
| MLPCDKEXt | 0,75 | 0,76 | 0,71 | 0,73 | 0,75 | 0,51 | 0,75 | 0,51 | 0,71 | 0,80 |
| MLPCDKGraph | 0,52 | 0,50 | 0,99 | 0,66 | 0,55 | 0,20 | 0,55 | 0,09 | 0,99 | 0,11 |
| MLPEstate | 0,70 | 0,69 | 0,67 | 0,68 | 0,70 | 0,40 | 0,70 | 0,40 | 0,67 | 0,73 |
| MLPFP4 | 0,89 | 0,88 | 0,89 | 0,88 | 0,89 | 0,78 | 0,89 | 0,78 | 0,89 | 0,89 |
| MLPFP4C | 0,96 | 0,95 | 0,97 | 0,96 | 0,96 | 0,92 | 0,96 | 0,92 | 0,97 | 0,95 |
| MLPKRC | 0,85 | 0,81 | 0,90 | 0,85 | 0,86 | 0,71 | 0,86 | 0,71 | 0,90 | 0,82 |
| MLPMACCS | 0,90 | 0,88 | 0,91 | 0,90 | 0,90 | 0,80 | 0,90 | 0,80 | 0,91 | 0,89 |
| MLPPubChem | 0,93 | 0,91 | 0,94 | 0,92 | 0,93 | 0,85 | 0,93 | 0,85 | 0,94 | 0,92 |
| NBAP2D | 0,69 | 0,69 | 0,63 | 0,66 | 0,69 | 0,39 | 0,69 | 0,38 | 0,63 | 0,75 |
| NBCDK | 0,96 | 0,97 | 0,94 | 0,96 | 0,96 | 0,92 | 0,96 | 0,92 | 0,94 | 0,98 |
| NBCDKEXt | 0,72 | 0,70 | 0,71 | 0,71 | 0,72 | 0,44 | 0,72 | 0,44 | 0,71 | 0,73 |
| NBCDKGraph | 0,82 | 0,81 | 0,80 | 0,81 | 0,82 | 0,64 | 0,82 | 0,64 | 0,80 | 0,84 |
| NBEstate | 0,51 | 0,49 | 0,98 | 0,66 | 0,54 | 0,17 | 0,54 | 0,08 | 0,98 | 0,10 |
| NBFP4 | 0,72 | 0,71 | 0,68 | 0,70 | 0,72 | 0,43 | 0,72 | 0,43 | 0,68 | 0,75 |
| NBFP4C | 0,95 | 0,95 | 0,95 | 0,95 | 0,95 | 0,90 | 0,95 | 0,90 | 0,95 | 0,95 |
| NBKRC | 0,97 | 0,96 | 0,98 | 0,97 | 0,97 | 0,94 | 0,97 | 0,94 | 0,98 | 0,97 |
| NBMACCS | 0,88 | 0,84 | 0,92 | 0,88 | 0,89 | 0,77 | 0,89 | 0,77 | 0,92 | 0,85 |
| NBPubChem | 0,96 | 0,95 | 0,97 | 0,96 | 0,96 | 0,93 | 0,96 | 0,93 | 0,97 | 0,96 |

**Table S2b:** Training performance of DPP-IV classifiers

| **Model** | **AUC** | **Precision** | **Recall** | **F1-Score** | **ROC AUC** | **MCC** | **Balanced Accuracy** | **Kappa** | **Sensitivity** | **Specificity** |
| --- | --- | --- | --- | --- | --- | --- | --- | --- | --- | --- |
| RFAP2D | 0,94 | 0,92 | 0,95 | 0,94 | 0,94 | 0,88 | 0,94 | 0,88 | 0,95 | 0,93 |
| RFCDK | 0,73 | 0,71 | 0,73 | 0,72 | 0,73 | 0,46 | 0,73 | 0,46 | 0,73 | 0,73 |
| RFCDKEXt | 0,97 | 0,98 | 0,96 | 0,97 | 0,97 | 0,94 | 0,97 | 0,94 | 0,96 | 0,98 |
| RFCDKGraph | 0,80 | 0,77 | 0,81 | 0,79 | 0,80 | 0,60 | 0,80 | 0,60 | 0,81 | 0,79 |
| RFEstate | 0,85 | 0,83 | 0,86 | 0,84 | 0,85 | 0,70 | 0,85 | 0,70 | 0,86 | 0,84 |
| RFFP4 | 0,65 | 0,58 | 0,99 | 0,73 | 0,67 | 0,43 | 0,67 | 0,33 | 0,99 | 0,36 |
| RFFP4C | 0,85 | 0,83 | 0,87 | 0,85 | 0,86 | 0,71 | 0,86 | 0,71 | 0,87 | 0,84 |
| RFKRC | 0,96 | 0,96 | 0,97 | 0,96 | 0,96 | 0,93 | 0,96 | 0,93 | 0,97 | 0,96 |
| RFMACCS | 0,95 | 0,94 | 0,96 | 0,95 | 0,95 | 0,90 | 0,95 | 0,90 | 0,96 | 0,94 |
| SVMPubChem | 0,88 | 0,85 | 0,90 | 0,87 | 0,88 | 0,75 | 0,88 | 0,75 | 0,90 | 0,85 |
| SVMAP2D | 0,94 | 0,93 | 0,94 | 0,94 | 0,94 | 0,88 | 0,94 | 0,88 | 0,94 | 0,94 |
| SVMCDK | 0,94 | 0,92 | 0,95 | 0,94 | 0,94 | 0,88 | 0,94 | 0,88 | 0,95 | 0,93 |
| SVMCDKEXt | 0,70 | 0,69 | 0,67 | 0,68 | 0,70 | 0,41 | 0,70 | 0,41 | 0,67 | 0,73 |
| SVMCDKGraph | 0,95 | 0,96 | 0,94 | 0,95 | 0,95 | 0,90 | 0,95 | 0,90 | 0,94 | 0,96 |
| SVMEstate | 0,84 | 0,80 | 0,87 | 0,84 | 0,84 | 0,68 | 0,84 | 0,68 | 0,87 | 0,81 |
| SVMFP4 | 0,82 | 0,78 | 0,85 | 0,81 | 0,82 | 0,63 | 0,82 | 0,63 | 0,85 | 0,78 |
| SVMFP4C | 0,60 | 0,55 | 0,87 | 0,67 | 0,61 | 0,27 | 0,61 | 0,22 | 0,87 | 0,35 |
| SVMKRC | 0,77 | 0,74 | 0,77 | 0,76 | 0,77 | 0,53 | 0,77 | 0,53 | 0,77 | 0,76 |
| SVMMACCS | 0,95 | 0,93 | 0,95 | 0,94 | 0,95 | 0,89 | 0,95 | 0,89 | 0,95 | 0,94 |
| SVMPubChem | 0,96 | 0,95 | 0,97 | 0,96 | 0,96 | 0,93 | 0,96 | 0,93 | 0,97 | 0,96 |
| XGBoostAP2D | 0,87 | 0,84 | 0,89 | 0,87 | 0,87 | 0,74 | 0,87 | 0,74 | 0,89 | 0,85 |
| XGBoostCDK | 0,96 | 0,94 | 0,96 | 0,95 | 0,96 | 0,91 | 0,96 | 0,91 | 0,96 | 0,95 |
| XGBoostCDKEXt | 0,94 | 0,93 | 0,96 | 0,94 | 0,94 | 0,89 | 0,94 | 0,89 | 0,96 | 0,93 |
| XGBoostCDKGraph | 0,71 | 0,70 | 0,65 | 0,68 | 0,70 | 0,41 | 0,70 | 0,41 | 0,65 | 0,76 |
| XGBoostEstate | 0,96 | 0,97 | 0,95 | 0,96 | 0,96 | 0,93 | 0,96 | 0,93 | 0,95 | 0,98 |
| XGBoostFP4 | 0,83 | 0,80 | 0,85 | 0,83 | 0,83 | 0,66 | 0,83 | 0,66 | 0,85 | 0,81 |
| XGBoostFP4C | 0,83 | 0,80 | 0,84 | 0,82 | 0,83 | 0,65 | 0,83 | 0,65 | 0,84 | 0,81 |
| XGBoostKRC | 0,57 | 0,52 | 0,95 | 0,67 | 0,59 | 0,25 | 0,59 | 0,17 | 0,95 | 0,23 |
| XGBoostMACCS | 0,81 | 0,79 | 0,81 | 0,80 | 0,81 | 0,61 | 0,81 | 0,61 | 0,81 | 0,81 |
| XGBoostPubChem | 0,96 | 0,95 | 0,96 | 0,95 | 0,96 | 0,91 | 0,96 | 0,91 | 0,96 | 0,96 |

**Table S2c: Training performance of DPP-IV classifiers**

**Table S3a: Testing performance of DPP-IV classifiers**

| **Model** | **AUC** | **Precision** | **Recall** | **F1-Score** | **ROC AUC** | **MCC** | **Balanced Accuracy** | **Kappa** | **Sensitivity** | **Specificity** |
| --- | --- | --- | --- | --- | --- | --- | --- | --- | --- | --- |
| AdaAP2D | 0,82 | 0,80 | 0,83 | 0,81 | 0,82 | 0,64 | 0,82 | 0,64 | 0,83 | 0,82 |
| AdaEstate | 0,79 | 0,77 | 0,80 | 0,78 | 0,79 | 0,59 | 0,79 | 0,58 | 0,80 | 0,78 |
| AdaCDEXt | 0,81 | 0,77 | 0,84 | 0,80 | 0,81 | 0,62 | 0,81 | 0,61 | 0,84 | 0,78 |
| AdaCDK | 0,82 | 0,79 | 0,82 | 0,81 | 0,82 | 0,63 | 0,82 | 0,63 | 0,82 | 0,81 |
| AdaCDKGraph | 0,67 | 0,66 | 0,62 | 0,64 | 0,66 | 0,33 | 0,66 | 0,33 | 0,62 | 0,71 |
| AdaKRC | 0,80 | 0,78 | 0,79 | 0,79 | 0,80 | 0,59 | 0,80 | 0,59 | 0,79 | 0,80 |
| AdaMACCS | 0,75 | 0,72 | 0,75 | 0,74 | 0,75 | 0,49 | 0,75 | 0,49 | 0,75 | 0,75 |
| AdaPubChem | 0,73 | 0,72 | 0,72 | 0,72 | 0,73 | 0,46 | 0,73 | 0,46 | 0,72 | 0,75 |
| AdaFP4C | 0,51 | 0,49 | 0,97 | 0,65 | 0,53 | 0,13 | 0,53 | 0,06 | 0,97 | 0,09 |
| AdaFP4 | 0,71 | 0,69 | 0,71 | 0,70 | 0,71 | 0,43 | 0,71 | 0,43 | 0,71 | 0,72 |
| BagAP2D | 0,82 | 0,80 | 0,82 | 0,81 | 0,82 | 0,64 | 0,82 | 0,64 | 0,82 | 0,82 |
| BagEstate | 0,77 | 0,74 | 0,78 | 0,76 | 0,77 | 0,54 | 0,77 | 0,54 | 0,78 | 0,75 |
| BagCDEXt | 0,74 | 0,72 | 0,75 | 0,73 | 0,74 | 0,49 | 0,74 | 0,49 | 0,75 | 0,74 |
| BagCDK | 0,77 | 0,74 | 0,77 | 0,76 | 0,77 | 0,53 | 0,77 | 0,53 | 0,77 | 0,76 |
| BagCDKGraph | 0,77 | 0,74 | 0,78 | 0,76 | 0,77 | 0,54 | 0,77 | 0,54 | 0,78 | 0,75 |
| BagKRC | 0,65 | 0,64 | 0,57 | 0,60 | 0,64 | 0,29 | 0,64 | 0,29 | 0,57 | 0,72 |
| BagMACCS | 0,76 | 0,74 | 0,75 | 0,74 | 0,76 | 0,51 | 0,76 | 0,51 | 0,75 | 0,76 |
| BagPubChem | 0,73 | 0,70 | 0,75 | 0,72 | 0,73 | 0,46 | 0,73 | 0,46 | 0,75 | 0,72 |
| BagFP4C | 0,72 | 0,70 | 0,70 | 0,70 | 0,72 | 0,43 | 0,72 | 0,43 | 0,70 | 0,73 |
| BagFP4 | 0,49 | 0,48 | 0,98 | 0,65 | 0,52 | 0,10 | 0,52 | 0,04 | 0,98 | 0,06 |
| DTAP2D | 0,64 | 0,62 | 0,60 | 0,61 | 0,64 | 0,28 | 0,64 | 0,28 | 0,60 | 0,67 |
| DTEstate | 0,76 | 0,73 | 0,78 | 0,75 | 0,76 | 0,52 | 0,76 | 0,52 | 0,78 | 0,74 |
| DTCDEXt | 0,85 | 0,84 | 0,85 | 0,85 | 0,85 | 0,71 | 0,85 | 0,70 | 0,85 | 0,85 |
| DTCDK | 0,81 | 0,79 | 0,83 | 0,81 | 0,82 | 0,63 | 0,82 | 0,63 | 0,83 | 0,80 |
| DTCDKGraph | 0,84 | 0,82 | 0,85 | 0,83 | 0,84 | 0,68 | 0,84 | 0,68 | 0,85 | 0,83 |
| DTKRC | 0,86 | 0,84 | 0,86 | 0,85 | 0,86 | 0,71 | 0,86 | 0,71 | 0,86 | 0,85 |
| DTMACCS | 0,75 | 0,74 | 0,72 | 0,73 | 0,75 | 0,50 | 0,75 | 0,50 | 0,72 | 0,78 |
| DTPubChem | 0,80 | 0,79 | 0,79 | 0,79 | 0,80 | 0,60 | 0,80 | 0,60 | 0,79 | 0,81 |
| DTFP4C | 0,84 | 0,81 | 0,87 | 0,84 | 0,85 | 0,69 | 0,85 | 0,69 | 0,87 | 0,82 |
| DTFP4 | 0,82 | 0,80 | 0,83 | 0,82 | 0,82 | 0,65 | 0,82 | 0,65 | 0,83 | 0,82 |
| GBAP2D | 0,64 | 0,60 | 0,67 | 0,63 | 0,64 | 0,28 | 0,64 | 0,28 | 0,67 | 0,61 |
| GBEstate | 0,82 | 0,79 | 0,83 | 0,81 | 0,82 | 0,64 | 0,82 | 0,64 | 0,83 | 0,81 |
| GBCDEXt | 0,84 | 0,83 | 0,82 | 0,82 | 0,84 | 0,67 | 0,84 | 0,67 | 0,82 | 0,85 |
| GBCDK | 0,85 | 0,84 | 0,85 | 0,84 | 0,85 | 0,70 | 0,85 | 0,70 | 0,85 | 0,85 |
| GBCDKGraph | 0,82 | 0,79 | 0,84 | 0,81 | 0,82 | 0,64 | 0,82 | 0,64 | 0,84 | 0,80 |
| GBKRC | 0,84 | 0,83 | 0,85 | 0,84 | 0,84 | 0,69 | 0,84 | 0,69 | 0,85 | 0,84 |
| GBMACCS | 0,86 | 0,84 | 0,86 | 0,85 | 0,86 | 0,71 | 0,86 | 0,71 | 0,86 | 0,85 |
| GBPubChem | 0,75 | 0,74 | 0,72 | 0,73 | 0,75 | 0,50 | 0,75 | 0,50 | 0,72 | 0,78 |

| Model | Accuracy | Precision | Recall | F1-Score | ROC AUC | MCC | Balanced Accuracy | Kappa | Sensitivity | Specificity |
| --- | --- | --- | --- | --- | --- | --- | --- | --- | --- | --- |
| GBFP4C | 0,81 | 0,80 | 0,81 | 0,80 | 0,81 | 0,63 | 0,81 | 0,63 | 0,81 | 0,82 |
| GBFP4 | 0,84 | 0,81 | 0,86 | 0,83 | 0,84 | 0,68 | 0,84 | 0,68 | 0,86 | 0,82 |
| KNNAP2D | 0,82 | 0,80 | 0,83 | 0,82 | 0,82 | 0,65 | 0,82 | 0,65 | 0,83 | 0,82 |
| KNNEstate | 0,63 | 0,62 | 0,57 | 0,59 | 0,63 | 0,26 | 0,63 | 0,26 | 0,57 | 0,68 |
| KNNCDEXt | 0,82 | 0,80 | 0,83 | 0,82 | 0,82 | 0,65 | 0,82 | 0,65 | 0,83 | 0,82 |
| KNNCDK | 0,84 | 0,84 | 0,82 | 0,83 | 0,84 | 0,68 | 0,84 | 0,68 | 0,82 | 0,86 |
| KNNCDKGraph | 0,84 | 0,83 | 0,84 | 0,83 | 0,84 | 0,68 | 0,84 | 0,68 | 0,84 | 0,84 |
| KNNKRC | 0,81 | 0,78 | 0,82 | 0,80 | 0,81 | 0,62 | 0,81 | 0,61 | 0,82 | 0,79 |
| KNNMACCS | 0,83 | 0,82 | 0,83 | 0,82 | 0,83 | 0,67 | 0,83 | 0,67 | 0,83 | 0,84 |
| KNNPubChem | 0,85 | 0,82 | 0,86 | 0,84 | 0,85 | 0,70 | 0,85 | 0,69 | 0,86 | 0,84 |
| KNNFP4C | 0,69 | 0,69 | 0,62 | 0,65 | 0,69 | 0,38 | 0,69 | 0,37 | 0,62 | 0,75 |
| KNNFP4 | 0,80 | 0,79 | 0,79 | 0,79 | 0,80 | 0,60 | 0,80 | 0,60 | 0,79 | 0,81 |
| LRAP2D | 0,81 | 0,79 | 0,83 | 0,81 | 0,81 | 0,63 | 0,81 | 0,63 | 0,83 | 0,80 |
| LREstate | 0,79 | 0,78 | 0,78 | 0,78 | 0,79 | 0,59 | 0,79 | 0,59 | 0,78 | 0,81 |
| LRCDEXt | 0,66 | 0,65 | 0,62 | 0,63 | 0,66 | 0,32 | 0,66 | 0,32 | 0,62 | 0,70 |
| LRCDK | 0,79 | 0,77 | 0,79 | 0,78 | 0,79 | 0,58 | 0,79 | 0,58 | 0,79 | 0,79 |
| LRCDKGraph | 0,83 | 0,82 | 0,82 | 0,82 | 0,83 | 0,66 | 0,83 | 0,66 | 0,82 | 0,84 |
| LRKRC | 0,86 | 0,85 | 0,86 | 0,86 | 0,86 | 0,73 | 0,86 | 0,73 | 0,86 | 0,86 |
| LRMACCS | 0,83 | 0,78 | 0,88 | 0,83 | 0,83 | 0,66 | 0,83 | 0,66 | 0,88 | 0,78 |
| LRPubChem | 0,85 | 0,83 | 0,85 | 0,84 | 0,85 | 0,69 | 0,85 | 0,69 | 0,85 | 0,84 |
| LRFP4C | 0,86 | 0,83 | 0,87 | 0,85 | 0,86 | 0,71 | 0,86 | 0,71 | 0,87 | 0,85 |
| LRFP4 | 0,72 | 0,69 | 0,72 | 0,71 | 0,72 | 0,43 | 0,72 | 0,43 | 0,72 | 0,71 |
| MLPAP2D | 0,83 | 0,82 | 0,81 | 0,81 | 0,83 | 0,65 | 0,83 | 0,65 | 0,81 | 0,84 |
| MLPEstate | 0,78 | 0,75 | 0,79 | 0,77 | 0,78 | 0,55 | 0,78 | 0,55 | 0,79 | 0,76 |
| MLPCDEXt | 0,81 | 0,79 | 0,81 | 0,80 | 0,81 | 0,62 | 0,81 | 0,62 | 0,81 | 0,81 |
| MLPCDK | 0,61 | 0,55 | 0,93 | 0,69 | 0,63 | 0,32 | 0,63 | 0,25 | 0,93 | 0,33 |
| MLPCDKGraph | 0,82 | 0,79 | 0,83 | 0,81 | 0,82 | 0,64 | 0,82 | 0,63 | 0,83 | 0,81 |
| MLPKRC | 0,85 | 0,84 | 0,85 | 0,84 | 0,85 | 0,70 | 0,85 | 0,70 | 0,85 | 0,85 |
| MLPMACCS | 0,84 | 0,82 | 0,85 | 0,83 | 0,84 | 0,68 | 0,84 | 0,68 | 0,85 | 0,83 |
| MLPPubChem | 0,82 | 0,78 | 0,85 | 0,82 | 0,82 | 0,64 | 0,82 | 0,64 | 0,85 | 0,79 |
| MLPFP4C | 0,83 | 0,82 | 0,83 | 0,82 | 0,83 | 0,67 | 0,83 | 0,66 | 0,83 | 0,84 |
| MLPFP4 | 0,84 | 0,82 | 0,85 | 0,84 | 0,84 | 0,68 | 0,84 | 0,68 | 0,85 | 0,83 |
| NBAP2D | 0,69 | 0,68 | 0,66 | 0,67 | 0,69 | 0,38 | 0,69 | 0,38 | 0,66 | 0,72 |
| NBEstate | 0,80 | 0,79 | 0,80 | 0,79 | 0,80 | 0,61 | 0,80 | 0,61 | 0,80 | 0,81 |
| NBCDEXt | 0,81 | 0,77 | 0,84 | 0,81 | 0,81 | 0,62 | 0,81 | 0,62 | 0,84 | 0,78 |
| NBCDK | 0,79 | 0,75 | 0,82 | 0,78 | 0,79 | 0,58 | 0,79 | 0,58 | 0,82 | 0,76 |
| NBCDKGraph | 0,60 | 0,55 | 0,87 | 0,67 | 0,61 | 0,26 | 0,61 | 0,22 | 0,87 | 0,35 |
| NBKRC | 0,75 | 0,72 | 0,75 | 0,74 | 0,75 | 0,50 | 0,75 | 0,50 | 0,75 | 0,75 |
| NBMACCS | 0,83 | 0,81 | 0,83 | 0,82 | 0,83 | 0,66 | 0,83 | 0,66 | 0,83 | 0,83 |
| NBPubChem | 0,84 | 0,82 | 0,84 | 0,83 | 0,84 | 0,67 | 0,84 | 0,67 | 0,84 | 0,83 |

**Table S3b:** Testing performance of DPP-IV classifiers

| Model | Accuracy | Precision | Recall | F1-Score | ROC AUC | MCC | Balanced Accuracy | Kappa | Sensitivity | Specificity |
| --- | --- | --- | --- | --- | --- | --- | --- | --- | --- | --- |
| NBFP4C | 0,80 | 0,77 | 0,83 | 0,80 | 0,80 | 0,61 | 0,80 | 0,61 | 0,83 | 0,78 |
| NBFP4 | 0,84 | 0,81 | 0,85 | 0,83 | 0,84 | 0,67 | 0,84 | 0,67 | 0,85 | 0,83 |
| RFAP2D | 0,85 | 0,82 | 0,86 | 0,84 | 0,85 | 0,69 | 0,85 | 0,69 | 0,86 | 0,84 |
| RFEstate | 0,70 | 0,70 | 0,65 | 0,67 | 0,70 | 0,40 | 0,70 | 0,40 | 0,65 | 0,75 |
| RFCDEXt | 0,81 | 0,80 | 0,80 | 0,80 | 0,81 | 0,62 | 0,81 | 0,62 | 0,80 | 0,82 |
| RFCDK | 0,79 | 0,76 | 0,81 | 0,79 | 0,79 | 0,58 | 0,79 | 0,58 | 0,81 | 0,78 |
| RFCDKGraph | 0,79 | 0,77 | 0,81 | 0,79 | 0,79 | 0,59 | 0,79 | 0,59 | 0,81 | 0,78 |
| RFKRC | 0,56 | 0,52 | 0,94 | 0,67 | 0,58 | 0,22 | 0,58 | 0,15 | 0,94 | 0,22 |
| RFMACCS | 0,77 | 0,75 | 0,77 | 0,76 | 0,77 | 0,54 | 0,77 | 0,54 | 0,77 | 0,77 |
| RFPubChem | 0,83 | 0,82 | 0,82 | 0,82 | 0,83 | 0,66 | 0,83 | 0,66 | 0,82 | 0,84 |
| RFFP4C | 0,84 | 0,82 | 0,84 | 0,83 | 0,84 | 0,68 | 0,84 | 0,68 | 0,84 | 0,84 |
| RFFP4 | 0,79 | 0,75 | 0,84 | 0,79 | 0,79 | 0,58 | 0,79 | 0,58 | 0,84 | 0,75 |
| SVMAP2D | 0,81 | 0,79 | 0,82 | 0,80 | 0,81 | 0,62 | 0,81 | 0,62 | 0,82 | 0,81 |
| SVMEstate | 0,84 | 0,82 | 0,84 | 0,83 | 0,84 | 0,68 | 0,84 | 0,68 | 0,84 | 0,84 |
| SVMCDEXt | 0,69 | 0,68 | 0,62 | 0,65 | 0,68 | 0,37 | 0,68 | 0,36 | 0,62 | 0,74 |
| SVMCDK | 0,80 | 0,78 | 0,79 | 0,79 | 0,80 | 0,59 | 0,80 | 0,59 | 0,79 | 0,80 |
| SVMCDKGraph | 0,71 | 0,69 | 0,70 | 0,70 | 0,71 | 0,43 | 0,71 | 0,43 | 0,70 | 0,72 |
| SVMKRC | 0,79 | 0,78 | 0,77 | 0,77 | 0,79 | 0,58 | 0,79 | 0,58 | 0,77 | 0,81 |
| SVMMACCS | 0,51 | 0,49 | 0,97 | 0,65 | 0,53 | 0,14 | 0,53 | 0,06 | 0,97 | 0,09 |
| SVMPubChem | 0,71 | 0,70 | 0,68 | 0,69 | 0,71 | 0,42 | 0,71 | 0,42 | 0,68 | 0,74 |
| SVMFP4C | 0,83 | 0,82 | 0,82 | 0,82 | 0,83 | 0,65 | 0,83 | 0,65 | 0,82 | 0,84 |
| SVMFP4 | 0,78 | 0,76 | 0,77 | 0,77 | 0,78 | 0,56 | 0,78 | 0,55 | 0,77 | 0,79 |
| XGBoostAP2D | 0,76 | 0,73 | 0,76 | 0,75 | 0,76 | 0,51 | 0,76 | 0,51 | 0,76 | 0,76 |
| XGBoostEstate | 0,78 | 0,76 | 0,79 | 0,78 | 0,79 | 0,57 | 0,79 | 0,57 | 0,79 | 0,78 |
| XGBoostCDEXt | 0,78 | 0,77 | 0,77 | 0,77 | 0,78 | 0,57 | 0,78 | 0,56 | 0,77 | 0,80 |
| XGBoostCDK | 0,65 | 0,67 | 0,51 | 0,58 | 0,64 | 0,29 | 0,64 | 0,29 | 0,51 | 0,77 |
| XGBoostCDKGraph | 0,76 | 0,76 | 0,73 | 0,74 | 0,76 | 0,52 | 0,76 | 0,52 | 0,73 | 0,79 |
| XGBoostKRC | 0,75 | 0,73 | 0,74 | 0,73 | 0,75 | 0,50 | 0,75 | 0,50 | 0,74 | 0,76 |
| XGBoostMACCS | 0,73 | 0,73 | 0,69 | 0,71 | 0,73 | 0,47 | 0,73 | 0,46 | 0,69 | 0,78 |
| XGBoostPubChem | 0,52 | 0,49 | 0,98 | 0,66 | 0,54 | 0,18 | 0,54 | 0,08 | 0,98 | 0,10 |
| XGBoostFP4C | 0,69 | 0,68 | 0,65 | 0,66 | 0,69 | 0,37 | 0,69 | 0,37 | 0,65 | 0,72 |
| XGBoostFP4 | 0,77 | 0,77 | 0,75 | 0,76 | 0,77 | 0,55 | 0,77 | 0,55 | 0,75 | 0,80 |

**Table S3c:** Testing performance of DPP-IV classifiers

| Model | Accuracy | Precision | Recall | F1-Score | ROC AUC | MCC | Balanced Accuracy | Kappa | Sensitivity | Specificity |
| --- | --- | --- | --- | --- | --- | --- | --- | --- | --- | --- |
| AdaAP2D | 0,81 | 0,82 | 0,80 | 0,81 | 0,81 | 0,62 | 0,81 | 0,62 | 0,80 | 0,81 |
| AdaEstate | 0,74 | 0,75 | 0,76 | 0,75 | 0,74 | 0,48 | 0,74 | 0,48 | 0,76 | 0,72 |
| AdaCDKEXt | 0,85 | 0,85 | 0,85 | 0,85 | 0,85 | 0,69 | 0,85 | 0,69 | 0,85 | 0,84 |
| AdaCDK | 0,83 | 0,84 | 0,83 | 0,84 | 0,83 | 0,66 | 0,83 | 0,66 | 0,83 | 0,83 |
| AdaCDKGraph | 0,81 | 0,82 | 0,81 | 0,81 | 0,81 | 0,62 | 0,81 | 0,62 | 0,81 | 0,81 |
| AdaKRC | 0,81 | 0,84 | 0,78 | 0,81 | 0,81 | 0,62 | 0,81 | 0,62 | 0,78 | 0,84 |
| AdaKR | 0,81 | 0,84 | 0,78 | 0,81 | 0,81 | 0,62 | 0,81 | 0,61 | 0,78 | 0,83 |
| AdaMACCS | 0,77 | 0,75 | 0,83 | 0,79 | 0,77 | 0,54 | 0,77 | 0,54 | 0,83 | 0,71 |
| AdaPubChem | 0,79 | 0,79 | 0,82 | 0,80 | 0,79 | 0,59 | 0,79 | 0,58 | 0,82 | 0,76 |
| AdaFP4C | 0,77 | 0,80 | 0,76 | 0,78 | 0,78 | 0,55 | 0,78 | 0,55 | 0,76 | 0,79 |
| AdaFP4 | 0,75 | 0,77 | 0,73 | 0,75 | 0,75 | 0,50 | 0,75 | 0,49 | 0,73 | 0,76 |
| BagAP2D | 0,91 | 0,93 | 0,90 | 0,91 | 0,91 | 0,83 | 0,91 | 0,82 | 0,90 | 0,92 |
| BagEstate | 0,85 | 0,85 | 0,87 | 0,86 | 0,85 | 0,70 | 0,85 | 0,70 | 0,87 | 0,84 |
| BagCDKEXt | 0,97 | 0,97 | 0,97 | 0,97 | 0,97 | 0,94 | 0,97 | 0,94 | 0,97 | 0,97 |
| BagCDK | 0,97 | 0,97 | 0,97 | 0,97 | 0,97 | 0,94 | 0,97 | 0,94 | 0,97 | 0,97 |
| BagCDKGraph | 0,94 | 0,94 | 0,94 | 0,94 | 0,94 | 0,87 | 0,94 | 0,87 | 0,94 | 0,94 |
| BagKRC | 0,97 | 0,98 | 0,97 | 0,97 | 0,97 | 0,94 | 0,97 | 0,94 | 0,97 | 0,97 |
| BagKR | 0,97 | 0,97 | 0,97 | 0,97 | 0,97 | 0,94 | 0,97 | 0,94 | 0,97 | 0,97 |
| BagMACCS | 0,95 | 0,95 | 0,95 | 0,95 | 0,95 | 0,90 | 0,95 | 0,90 | 0,95 | 0,95 |
| BagPubChem | 0,95 | 0,95 | 0,95 | 0,95 | 0,95 | 0,90 | 0,95 | 0,90 | 0,95 | 0,95 |
| BagFP4C | 0,96 | 0,96 | 0,96 | 0,96 | 0,96 | 0,91 | 0,96 | 0,91 | 0,96 | 0,96 |
| BagFP4 | 0,89 | 0,90 | 0,90 | 0,90 | 0,89 | 0,79 | 0,89 | 0,79 | 0,90 | 0,89 |
| DTAP2D | 0,92 | 0,95 | 0,88 | 0,92 | 0,92 | 0,83 | 0,92 | 0,83 | 0,88 | 0,95 |
| DTEstate | 0,85 | 0,87 | 0,84 | 0,86 | 0,85 | 0,71 | 0,85 | 0,71 | 0,84 | 0,86 |
| DTCDKEXt | 0,98 | 0,99 | 0,97 | 0,98 | 0,98 | 0,96 | 0,98 | 0,96 | 0,97 | 0,99 |
| DTCDK | 0,98 | 0,99 | 0,96 | 0,98 | 0,98 | 0,95 | 0,98 | 0,95 | 0,96 | 0,99 |
| DTCDKGraph | 0,94 | 0,96 | 0,93 | 0,94 | 0,94 | 0,88 | 0,94 | 0,88 | 0,93 | 0,96 |
| DTKRC | 0,98 | 0,99 | 0,96 | 0,98 | 0,98 | 0,95 | 0,98 | 0,95 | 0,96 | 0,99 |
| DTKR | 0,98 | 0,99 | 0,96 | 0,98 | 0,98 | 0,95 | 0,98 | 0,95 | 0,96 | 0,99 |
| DTMACCS | 0,96 | 0,97 | 0,94 | 0,96 | 0,96 | 0,92 | 0,96 | 0,92 | 0,94 | 0,97 |
| DTPubChem | 0,96 | 0,97 | 0,94 | 0,96 | 0,96 | 0,91 | 0,96 | 0,91 | 0,94 | 0,97 |
| DTFP4C | 0,96 | 0,98 | 0,95 | 0,96 | 0,96 | 0,93 | 0,96 | 0,93 | 0,95 | 0,98 |
| DTFP4 | 0,90 | 0,92 | 0,88 | 0,90 | 0,90 | 0,80 | 0,90 | 0,80 | 0,88 | 0,92 |
| GBAP2D | 0,87 | 0,88 | 0,88 | 0,88 | 0,87 | 0,75 | 0,87 | 0,75 | 0,88 | 0,87 |
| GBEstate | 0,81 | 0,84 | 0,79 | 0,81 | 0,81 | 0,62 | 0,81 | 0,62 | 0,79 | 0,84 |
| GBCDKEXt | 0,93 | 0,93 | 0,93 | 0,93 | 0,93 | 0,86 | 0,93 | 0,86 | 0,93 | 0,92 |
| GBCDK | 0,92 | 0,93 | 0,93 | 0,93 | 0,92 | 0,85 | 0,92 | 0,85 | 0,93 | 0,92 |
| GBCDKGraph | 0,89 | 0,89 | 0,90 | 0,90 | 0,89 | 0,79 | 0,89 | 0,79 | 0,90 | 0,88 |
| GBKRC | 0,90 | 0,92 | 0,90 | 0,91 | 0,90 | 0,81 | 0,90 | 0,81 | 0,90 | 0,91 |
| GBKR | 0,90 | 0,91 | 0,89 | 0,90 | 0,90 | 0,79 | 0,90 | 0,79 | 0,89 | 0,90 |
| GBMACCS | 0,86 | 0,85 | 0,88 | 0,87 | 0,86 | 0,72 | 0,86 | 0,72 | 0,88 | 0,84 |
| GBPubChem | 0,89 | 0,90 | 0,89 | 0,90 | 0,89 | 0,78 | 0,89 | 0,78 | 0,89 | 0,89 |

**Table S4a:** Training performance of Sglt2 classifiers

| Model | Accuracy | Precision | Recall | F1-Score | ROC AUC | MCC | Balanced Accuracy | Kappa | Sensitivity | Specificity |
| --- | --- | --- | --- | --- | --- | --- | --- | --- | --- | --- |
| GBFP4C | 0,87 | 0,87 | 0,89 | 0,88 | 0,87 | 0,75 | 0,87 | 0,75 | 0,89 | 0,86 |
| GBFP4 | 0,82 | 0,85 | 0,80 | 0,82 | 0,82 | 0,65 | 0,82 | 0,64 | 0,80 | 0,85 |
| KNNAP2D | 0,86 | 0,87 | 0,86 | 0,86 | 0,86 | 0,71 | 0,86 | 0,71 | 0,86 | 0,86 |
| KNNEstate | 0,75 | 0,79 | 0,72 | 0,75 | 0,76 | 0,52 | 0,76 | 0,51 | 0,72 | 0,79 |
| KNNCDKExt | 0,87 | 0,85 | 0,92 | 0,88 | 0,87 | 0,75 | 0,87 | 0,74 | 0,92 | 0,83 |
| KNNCDK | 0,87 | 0,85 | 0,92 | 0,88 | 0,87 | 0,75 | 0,87 | 0,75 | 0,92 | 0,83 |
| KNNCDKGraph | 0,86 | 0,87 | 0,86 | 0,86 | 0,86 | 0,72 | 0,86 | 0,71 | 0,86 | 0,86 |
| KNNKRC | 0,87 | 0,87 | 0,89 | 0,88 | 0,87 | 0,74 | 0,87 | 0,74 | 0,89 | 0,85 |
| KNNKRC | 0,88 | 0,88 | 0,89 | 0,89 | 0,88 | 0,77 | 0,88 | 0,77 | 0,89 | 0,87 |
| KNNMACCS | 0,87 | 0,85 | 0,90 | 0,88 | 0,87 | 0,74 | 0,87 | 0,74 | 0,90 | 0,83 |
| KNNPubChem | 0,87 | 0,87 | 0,88 | 0,88 | 0,87 | 0,74 | 0,87 | 0,74 | 0,88 | 0,86 |
| KNNFP4C | 0,87 | 0,85 | 0,92 | 0,88 | 0,87 | 0,74 | 0,87 | 0,74 | 0,92 | 0,82 |
| KNNFP4 | 0,84 | 0,84 | 0,85 | 0,85 | 0,84 | 0,68 | 0,84 | 0,68 | 0,85 | 0,82 |
| LRAP2D | 0,85 | 0,85 | 0,85 | 0,85 | 0,85 | 0,70 | 0,85 | 0,70 | 0,85 | 0,84 |
| LREstate | 0,74 | 0,75 | 0,77 | 0,76 | 0,74 | 0,49 | 0,74 | 0,49 | 0,77 | 0,72 |
| LRCDKExt | 0,96 | 0,96 | 0,96 | 0,96 | 0,96 | 0,92 | 0,96 | 0,92 | 0,96 | 0,96 |
| LRCDK | 0,96 | 0,96 | 0,96 | 0,96 | 0,96 | 0,92 | 0,96 | 0,92 | 0,96 | 0,96 |
| LRCDKGraph | 0,91 | 0,91 | 0,91 | 0,91 | 0,91 | 0,81 | 0,91 | 0,81 | 0,91 | 0,90 |
| LRKRC | 0,91 | 0,92 | 0,91 | 0,91 | 0,91 | 0,82 | 0,91 | 0,82 | 0,91 | 0,91 |
| LRKRC | 0,91 | 0,92 | 0,90 | 0,91 | 0,91 | 0,82 | 0,91 | 0,82 | 0,90 | 0,92 |
| LRMACCS | 0,82 | 0,82 | 0,84 | 0,83 | 0,82 | 0,64 | 0,82 | 0,64 | 0,84 | 0,81 |
| LRPubChem | 0,89 | 0,90 | 0,89 | 0,90 | 0,89 | 0,79 | 0,89 | 0,79 | 0,89 | 0,90 |
| LRFP4C | 0,81 | 0,80 | 0,83 | 0,82 | 0,80 | 0,61 | 0,80 | 0,61 | 0,83 | 0,78 |
| LRFP4 | 0,80 | 0,81 | 0,80 | 0,80 | 0,80 | 0,59 | 0,80 | 0,59 | 0,80 | 0,79 |
| MLPAP2D | 0,90 | 0,90 | 0,90 | 0,90 | 0,90 | 0,79 | 0,90 | 0,79 | 0,90 | 0,89 |
| MLPEstate | 0,84 | 0,83 | 0,87 | 0,85 | 0,84 | 0,68 | 0,84 | 0,68 | 0,87 | 0,81 |
| MLPCDKExt | 0,96 | 0,96 | 0,96 | 0,96 | 0,96 | 0,92 | 0,96 | 0,92 | 0,96 | 0,96 |
| MLPCDK | 0,96 | 0,96 | 0,96 | 0,96 | 0,96 | 0,92 | 0,96 | 0,92 | 0,96 | 0,96 |
| MLPCDKGraph | 0,91 | 0,91 | 0,93 | 0,92 | 0,91 | 0,83 | 0,91 | 0,83 | 0,93 | 0,90 |
| MLPKRC | 0,96 | 0,96 | 0,95 | 0,96 | 0,96 | 0,91 | 0,96 | 0,91 | 0,95 | 0,96 |
| MLPKRC | 0,96 | 0,97 | 0,96 | 0,96 | 0,96 | 0,93 | 0,96 | 0,93 | 0,96 | 0,97 |
| MLPMACCS | 0,93 | 0,92 | 0,94 | 0,93 | 0,93 | 0,86 | 0,93 | 0,86 | 0,94 | 0,91 |
| MLPPubChem | 0,93 | 0,93 | 0,94 | 0,93 | 0,93 | 0,86 | 0,93 | 0,86 | 0,94 | 0,92 |
| MLPFP4C | 0,88 | 0,89 | 0,89 | 0,89 | 0,88 | 0,76 | 0,88 | 0,76 | 0,89 | 0,88 |
| MLPFP4 | 0,88 | 0,90 | 0,86 | 0,88 | 0,88 | 0,76 | 0,88 | 0,76 | 0,86 | 0,90 |
| NBAP2D | 0,59 | 0,56 | 0,99 | 0,72 | 0,58 | 0,28 | 0,58 | 0,16 | 0,99 | 0,16 |
| NBEstate | 0,58 | 0,55 | 0,96 | 0,70 | 0,56 | 0,21 | 0,56 | 0,13 | 0,96 | 0,17 |
| NBCDKExt | 0,69 | 0,64 | 0,90 | 0,75 | 0,68 | 0,40 | 0,68 | 0,37 | 0,90 | 0,46 |
| NBCDK | 0,69 | 0,64 | 0,90 | 0,75 | 0,68 | 0,40 | 0,68 | 0,37 | 0,90 | 0,46 |
| NBCDKGraph | 0,70 | 0,64 | 0,95 | 0,77 | 0,69 | 0,45 | 0,69 | 0,39 | 0,95 | 0,44 |
| NBKRC | 0,75 | 0,68 | 1,00 | 0,81 | 0,74 | 0,57 | 0,74 | 0,50 | 1,00 | 0,49 |
| NBKRC | 0,75 | 0,68 | 1,00 | 0,81 | 0,74 | 0,57 | 0,74 | 0,49 | 1,00 | 0,49 |
| NBMACCS | 0,60 | 0,57 | 0,98 | 0,72 | 0,58 | 0,28 | 0,58 | 0,17 | 0,98 | 0,19 |
| NBPubChem | 0,64 | 0,59 | 0,99 | 0,74 | 0,62 | 0,37 | 0,62 | 0,26 | 0,99 | 0,26 |

**Table S4b**: Training performance of Sglt2 classifiers

**Table S4c**: Training performance of Sglt2 classifiers

| Model | Accuracy | Precision | Recall | F1-Score | ROC AUC | MCC | Balanced Accuracy | Kappa | Sensitivity | Specificity |
| --- | --- | --- | --- | --- | --- | --- | --- | --- | --- | --- |
| NBFP4C | 0,63 | 0,58 | 0,98 | 0,73 | 0,61 | 0,33 | 0,61 | 0,23 | 0,98 | 0,25 |
| NBFP4 | 0,62 | 0,58 | 0,99 | 0,73 | 0,60 | 0,33 | 0,60 | 0,21 | 0,99 | 0,22 |
| RFAP2D | 0,92 | 0,93 | 0,91 | 0,92 | 0,92 | 0,83 | 0,92 | 0,83 | 0,91 | 0,93 |
| RFEstate | 0,85 | 0,86 | 0,86 | 0,86 | 0,85 | 0,71 | 0,85 | 0,71 | 0,86 | 0,85 |
| RFCDKExt | 0,98 | 0,98 | 0,98 | 0,98 | 0,98 | 0,96 | 0,98 | 0,96 | 0,98 | 0,98 |
| RFCDK | 0,98 | 0,98 | 0,97 | 0,98 | 0,98 | 0,95 | 0,98 | 0,95 | 0,97 | 0,98 |
| RFCDKGraph | 0,94 | 0,95 | 0,94 | 0,94 | 0,94 | 0,88 | 0,94 | 0,88 | 0,94 | 0,94 |
| RFKRC | 0,98 | 0,98 | 0,98 | 0,98 | 0,98 | 0,95 | 0,98 | 0,95 | 0,98 | 0,98 |
| RFKRC | 0,98 | 0,98 | 0,97 | 0,98 | 0,98 | 0,95 | 0,98 | 0,95 | 0,97 | 0,98 |
| RFMACCS | 0,96 | 0,96 | 0,96 | 0,96 | 0,96 | 0,92 | 0,96 | 0,92 | 0,96 | 0,95 |
| RFPubChem | 0,96 | 0,96 | 0,96 | 0,96 | 0,96 | 0,91 | 0,96 | 0,91 | 0,96 | 0,95 |
| RFFP4C | 0,96 | 0,96 | 0,96 | 0,96 | 0,96 | 0,93 | 0,96 | 0,93 | 0,96 | 0,96 |
| RFFP4 | 0,90 | 0,91 | 0,89 | 0,90 | 0,90 | 0,80 | 0,90 | 0,80 | 0,89 | 0,90 |
| SVMAP2D | 0,84 | 0,84 | 0,86 | 0,85 | 0,84 | 0,69 | 0,84 | 0,68 | 0,86 | 0,82 |
| SVMEstate | 0,80 | 0,83 | 0,76 | 0,80 | 0,80 | 0,60 | 0,80 | 0,59 | 0,76 | 0,83 |
| SVMCDKExt | 0,88 | 0,88 | 0,88 | 0,88 | 0,88 | 0,76 | 0,88 | 0,76 | 0,88 | 0,88 |
| SVMCDK | 0,88 | 0,88 | 0,88 | 0,88 | 0,88 | 0,76 | 0,88 | 0,76 | 0,88 | 0,87 |
| SVMCDKGraph | 0,86 | 0,87 | 0,85 | 0,86 | 0,86 | 0,71 | 0,86 | 0,71 | 0,85 | 0,87 |
| SVMKRC | 0,79 | 0,86 | 0,72 | 0,78 | 0,80 | 0,59 | 0,80 | 0,59 | 0,72 | 0,87 |
| SVMKRC | 0,87 | 0,88 | 0,86 | 0,87 | 0,87 | 0,73 | 0,87 | 0,73 | 0,86 | 0,88 |
| SVMMACCS | 0,83 | 0,83 | 0,86 | 0,84 | 0,83 | 0,66 | 0,83 | 0,66 | 0,86 | 0,81 |
| SVMPubChem | 0,84 | 0,83 | 0,87 | 0,85 | 0,84 | 0,68 | 0,84 | 0,68 | 0,87 | 0,81 |
| SVMFP4C | 0,74 | 0,73 | 0,79 | 0,76 | 0,74 | 0,48 | 0,74 | 0,48 | 0,79 | 0,68 |
| SVMFP4 | 0,79 | 0,86 | 0,72 | 0,78 | 0,80 | 0,60 | 0,80 | 0,59 | 0,72 | 0,87 |
| XGBoostAP2D | 0,91 | 0,91 | 0,92 | 0,91 | 0,91 | 0,82 | 0,91 | 0,82 | 0,92 | 0,90 |
| XGBoostEstate | 0,85 | 0,85 | 0,85 | 0,85 | 0,85 | 0,69 | 0,85 | 0,69 | 0,85 | 0,84 |
| XGBoostCDKExt | 0,98 | 0,98 | 0,97 | 0,98 | 0,98 | 0,95 | 0,98 | 0,95 | 0,97 | 0,98 |
| XGBoostCDK | 0,97 | 0,98 | 0,97 | 0,98 | 0,97 | 0,95 | 0,97 | 0,95 | 0,97 | 0,98 |
| XGBoostCDKGraph | 0,93 | 0,93 | 0,94 | 0,93 | 0,93 | 0,86 | 0,93 | 0,86 | 0,94 | 0,93 |
| XGBoostKRC | 0,97 | 0,97 | 0,96 | 0,97 | 0,97 | 0,93 | 0,97 | 0,93 | 0,96 | 0,97 |
| XGBoostKRC | 0,95 | 0,96 | 0,95 | 0,96 | 0,95 | 0,91 | 0,95 | 0,91 | 0,95 | 0,96 |
| XGBoostMACCS | 0,95 | 0,95 | 0,96 | 0,95 | 0,95 | 0,91 | 0,95 | 0,91 | 0,96 | 0,95 |
| XGBoostPubChem | 0,95 | 0,95 | 0,95 | 0,95 | 0,95 | 0,89 | 0,95 | 0,89 | 0,95 | 0,95 |
| XGBoostFP4C | 0,95 | 0,95 | 0,96 | 0,96 | 0,95 | 0,91 | 0,95 | 0,91 | 0,96 | 0,95 |
| XGBoostFP4 | 0,88 | 0,90 | 0,87 | 0,88 | 0,88 | 0,77 | 0,88 | 0,77 | 0,87 | 0,90 |

**Table S5a: Testing performance of Sglt2 classifiers**

| Model | Accuracy | Precision | Recall | F1-Score | ROC AUC | MCC | Balanced Accuracy | Kappa | Sensitivity | Specificity |
| --- | --- | --- | --- | --- | --- | --- | --- | --- | --- | --- |
| AdaAP2D | 0,80 | 0,81 | 0,80 | 0,80 | 0,80 | 0,60 | 0,80 | 0,60 | 0,80 | 0,80 |
| AdaEstate | 0,73 | 0,74 | 0,75 | 0,75 | 0,73 | 0,47 | 0,73 | 0,47 | 0,75 | 0,72 |
| AdaCDKExt | 0,83 | 0,84 | 0,83 | 0,83 | 0,83 | 0,66 | 0,83 | 0,66 | 0,83 | 0,83 |
| AdaCDK | 0,81 | 0,83 | 0,81 | 0,82 | 0,81 | 0,63 | 0,81 | 0,63 | 0,81 | 0,81 |
| AdaCDKGraph | 0,80 | 0,81 | 0,81 | 0,80 | 0,80 | 0,60 | 0,80 | 0,60 | 0,81 | 0,79 |
| AdaKRC | 0,79 | 0,81 | 0,77 | 0,79 | 0,79 | 0,58 | 0,79 | 0,58 | 0,77 | 0,81 |
| AdaKRC | 0,80 | 0,82 | 0,77 | 0,80 | 0,80 | 0,60 | 0,80 | 0,59 | 0,77 | 0,82 |
| AdaMACCS | 0,77 | 0,75 | 0,82 | 0,79 | 0,77 | 0,54 | 0,77 | 0,54 | 0,82 | 0,71 |
| AdaPubChem | 0,79 | 0,78 | 0,82 | 0,80 | 0,78 | 0,57 | 0,78 | 0,57 | 0,82 | 0,75 |
| AdaFP4C | 0,77 | 0,79 | 0,76 | 0,78 | 0,77 | 0,55 | 0,77 | 0,55 | 0,76 | 0,78 |
| AdaFP4 | 0,74 | 0,77 | 0,72 | 0,74 | 0,74 | 0,48 | 0,74 | 0,47 | 0,72 | 0,76 |
| BagAP2D | 0,83 | 0,85 | 0,82 | 0,83 | 0,83 | 0,66 | 0,83 | 0,66 | 0,82 | 0,84 |
| BagEstate | 0,80 | 0,80 | 0,83 | 0,81 | 0,80 | 0,61 | 0,80 | 0,60 | 0,83 | 0,78 |
| BagCDKExt | 0,85 | 0,86 | 0,87 | 0,86 | 0,85 | 0,71 | 0,85 | 0,71 | 0,87 | 0,84 |
| BagCDK | 0,86 | 0,87 | 0,86 | 0,86 | 0,86 | 0,72 | 0,86 | 0,72 | 0,86 | 0,85 |
| BagCDKGraph | 0,84 | 0,84 | 0,85 | 0,84 | 0,84 | 0,67 | 0,84 | 0,67 | 0,85 | 0,82 |
| BagKRC | 0,85 | 0,86 | 0,85 | 0,85 | 0,85 | 0,70 | 0,85 | 0,70 | 0,85 | 0,86 |
| BagKRC | 0,86 | 0,87 | 0,86 | 0,86 | 0,86 | 0,72 | 0,86 | 0,72 | 0,86 | 0,86 |
| BagMACCS | 0,83 | 0,84 | 0,84 | 0,84 | 0,83 | 0,66 | 0,83 | 0,66 | 0,84 | 0,82 |
| BagPubChem | 0,84 | 0,85 | 0,83 | 0,84 | 0,84 | 0,67 | 0,84 | 0,67 | 0,83 | 0,85 |
| BagFP4C | 0,84 | 0,86 | 0,83 | 0,85 | 0,84 | 0,69 | 0,84 | 0,68 | 0,83 | 0,85 |
| BagFP4 | 0,81 | 0,82 | 0,82 | 0,82 | 0,81 | 0,62 | 0,81 | 0,62 | 0,82 | 0,80 |
| DTAP2D | 0,82 | 0,85 | 0,79 | 0,82 | 0,82 | 0,64 | 0,82 | 0,64 | 0,79 | 0,85 |
| DTEstate | 0,80 | 0,81 | 0,80 | 0,80 | 0,79 | 0,59 | 0,79 | 0,59 | 0,80 | 0,79 |
| DTCDKExt | 0,83 | 0,84 | 0,83 | 0,83 | 0,83 | 0,66 | 0,83 | 0,66 | 0,83 | 0,82 |
| DTCDK | 0,83 | 0,84 | 0,84 | 0,84 | 0,83 | 0,67 | 0,83 | 0,67 | 0,84 | 0,83 |
| DTCDKGraph | 0,82 | 0,83 | 0,83 | 0,83 | 0,82 | 0,64 | 0,82 | 0,64 | 0,83 | 0,81 |
| DTKRC | 0,85 | 0,86 | 0,84 | 0,85 | 0,85 | 0,69 | 0,85 | 0,69 | 0,84 | 0,85 |
| DTKRC | 0,85 | 0,85 | 0,85 | 0,85 | 0,85 | 0,69 | 0,85 | 0,69 | 0,85 | 0,84 |
| DTMACCS | 0,83 | 0,84 | 0,82 | 0,83 | 0,83 | 0,65 | 0,83 | 0,65 | 0,82 | 0,83 |
| DTPubChem | 0,82 | 0,84 | 0,82 | 0,82 | 0,82 | 0,64 | 0,82 | 0,64 | 0,82 | 0,83 |
| DTFP4C | 0,81 | 0,83 | 0,80 | 0,81 | 0,81 | 0,62 | 0,81 | 0,62 | 0,80 | 0,81 |
| DTFP4 | 0,81 | 0,83 | 0,81 | 0,81 | 0,81 | 0,62 | 0,81 | 0,62 | 0,81 | 0,81 |
| GBAP2D | 0,83 | 0,84 | 0,83 | 0,83 | 0,83 | 0,65 | 0,83 | 0,65 | 0,83 | 0,82 |
| GBEstate | 0,79 | 0,82 | 0,76 | 0,79 | 0,79 | 0,58 | 0,79 | 0,58 | 0,76 | 0,82 |
| GBCDKExt | 0,85 | 0,86 | 0,86 | 0,86 | 0,85 | 0,71 | 0,85 | 0,71 | 0,86 | 0,85 |
| GBCDK | 0,86 | 0,86 | 0,86 | 0,86 | 0,86 | 0,72 | 0,86 | 0,71 | 0,86 | 0,85 |
| GBCDKGraph | 0,84 | 0,84 | 0,85 | 0,84 | 0,84 | 0,68 | 0,84 | 0,68 | 0,85 | 0,83 |
| GBKRC | 0,85 | 0,87 | 0,84 | 0,85 | 0,85 | 0,70 | 0,85 | 0,70 | 0,84 | 0,86 |
| GBKRC | 0,84 | 0,86 | 0,84 | 0,85 | 0,84 | 0,69 | 0,84 | 0,69 | 0,84 | 0,85 |
| GBMACCS | 0,82 | 0,82 | 0,84 | 0,83 | 0,82 | 0,64 | 0,82 | 0,64 | 0,84 | 0,80 |
| GBPubChem | 0,85 | 0,85 | 0,85 | 0,85 | 0,85 | 0,69 | 0,85 | 0,69 | 0,85 | 0,84 |

| **Model** | **AUC** | **Precision** | **Recall** | **F1-Score** | **ROC AUC** | **MCC** | **Balanced Accuracy** | **Kappa** | **Sensitivity** | **Specificity** |
| --- | --- | --- | --- | --- | --- | --- | --- | --- | --- | --- |
| GBFP4C | 0,83 | 0,83 | 0,85 | 0,84 | 0,83 | 0,66 | 0,83 | 0,65 | 0,85 | 0,80 |
| GBFP4 | 0,78 | 0,81 | 0,76 | 0,78 | 0,78 | 0,57 | 0,78 | 0,57 | 0,76 | 0,81 |
| KNNAP2D | 0,81 | 0,83 | 0,80 | 0,81 | 0,81 | 0,62 | 0,81 | 0,62 | 0,80 | 0,82 |
| KNNEstate | 0,70 | 0,73 | 0,69 | 0,70 | 0,70 | 0,41 | 0,70 | 0,41 | 0,69 | 0,72 |
| KNNCDKExt | 0,82 | 0,80 | 0,88 | 0,84 | 0,82 | 0,65 | 0,82 | 0,65 | 0,88 | 0,76 |
| KNNCDK | 0,83 | 0,80 | 0,88 | 0,84 | 0,82 | 0,66 | 0,82 | 0,65 | 0,88 | 0,77 |
| KNNCDKGraph | 0,80 | 0,81 | 0,80 | 0,81 | 0,80 | 0,61 | 0,80 | 0,60 | 0,80 | 0,80 |
| KNNKRC | 0,81 | 0,80 | 0,85 | 0,82 | 0,81 | 0,63 | 0,81 | 0,62 | 0,85 | 0,77 |
| KNNKRC | 0,83 | 0,83 | 0,87 | 0,84 | 0,83 | 0,67 | 0,83 | 0,67 | 0,87 | 0,80 |
| KNNMACCS | 0,81 | 0,80 | 0,85 | 0,82 | 0,81 | 0,62 | 0,81 | 0,62 | 0,85 | 0,76 |
| KNNPubChem | 0,81 | 0,82 | 0,83 | 0,82 | 0,81 | 0,63 | 0,81 | 0,63 | 0,83 | 0,80 |
| KNNFP4C | 0,82 | 0,80 | 0,88 | 0,83 | 0,82 | 0,64 | 0,82 | 0,63 | 0,88 | 0,76 |
| KNNFP4 | 0,79 | 0,79 | 0,80 | 0,80 | 0,79 | 0,57 | 0,79 | 0,57 | 0,80 | 0,77 |
| LRAP2D | 0,81 | 0,82 | 0,82 | 0,82 | 0,81 | 0,63 | 0,81 | 0,63 | 0,82 | 0,81 |
| LREstate | 0,74 | 0,74 | 0,76 | 0,75 | 0,74 | 0,47 | 0,74 | 0,47 | 0,76 | 0,71 |
| LRCDKExt | 0,86 | 0,87 | 0,87 | 0,87 | 0,86 | 0,73 | 0,86 | 0,73 | 0,87 | 0,85 |
| LRCDK | 0,87 | 0,88 | 0,88 | 0,88 | 0,87 | 0,74 | 0,87 | 0,74 | 0,88 | 0,86 |
| LRCDKGraph | 0,85 | 0,85 | 0,86 | 0,86 | 0,85 | 0,70 | 0,85 | 0,70 | 0,86 | 0,83 |
| LRKRC | 0,85 | 0,87 | 0,85 | 0,86 | 0,85 | 0,70 | 0,85 | 0,70 | 0,85 | 0,86 |
| LRKRC | 0,85 | 0,86 | 0,85 | 0,85 | 0,85 | 0,70 | 0,85 | 0,70 | 0,85 | 0,85 |
| LRMACCS | 0,80 | 0,80 | 0,81 | 0,81 | 0,80 | 0,59 | 0,80 | 0,59 | 0,81 | 0,78 |
| LRPubChem | 0,85 | 0,86 | 0,85 | 0,85 | 0,85 | 0,70 | 0,85 | 0,70 | 0,85 | 0,85 |
| LRFP4C | 0,79 | 0,78 | 0,82 | 0,80 | 0,79 | 0,58 | 0,79 | 0,58 | 0,82 | 0,76 |
| LRFP4 | 0,78 | 0,79 | 0,78 | 0,78 | 0,78 | 0,56 | 0,78 | 0,56 | 0,78 | 0,78 |
| MLPAP2D | 0,83 | 0,84 | 0,83 | 0,83 | 0,83 | 0,66 | 0,83 | 0,65 | 0,83 | 0,82 |
| MLPEstate | 0,80 | 0,80 | 0,82 | 0,81 | 0,80 | 0,60 | 0,80 | 0,59 | 0,82 | 0,77 |
| MLPCDKExt | 0,86 | 0,87 | 0,86 | 0,86 | 0,86 | 0,72 | 0,86 | 0,72 | 0,86 | 0,86 |
| MLPCDK | 0,87 | 0,87 | 0,87 | 0,87 | 0,87 | 0,74 | 0,87 | 0,73 | 0,87 | 0,86 |
| MLPCDKGraph | 0,85 | 0,85 | 0,86 | 0,85 | 0,85 | 0,70 | 0,85 | 0,69 | 0,86 | 0,83 |
| MLPKRC | 0,85 | 0,86 | 0,85 | 0,85 | 0,85 | 0,70 | 0,85 | 0,70 | 0,85 | 0,85 |
| MLPKRC | 0,85 | 0,87 | 0,85 | 0,86 | 0,85 | 0,71 | 0,85 | 0,71 | 0,85 | 0,86 |
| MLPMACCS | 0,82 | 0,82 | 0,85 | 0,83 | 0,82 | 0,64 | 0,82 | 0,64 | 0,85 | 0,79 |
| MLPPubChem | 0,85 | 0,86 | 0,86 | 0,86 | 0,85 | 0,71 | 0,85 | 0,70 | 0,86 | 0,84 |
| MLPFP4C | 0,82 | 0,83 | 0,84 | 0,83 | 0,82 | 0,65 | 0,82 | 0,64 | 0,84 | 0,80 |
| MLPFP4 | 0,82 | 0,84 | 0,81 | 0,82 | 0,82 | 0,64 | 0,82 | 0,64 | 0,81 | 0,83 |
| NBAP2D | 0,58 | 0,55 | 0,97 | 0,71 | 0,56 | 0,22 | 0,56 | 0,13 | 0,97 | 0,15 |
| NBEstate | 0,57 | 0,55 | 0,95 | 0,70 | 0,56 | 0,18 | 0,56 | 0,11 | 0,95 | 0,16 |
| NBCDKExt | 0,68 | 0,64 | 0,89 | 0,74 | 0,67 | 0,39 | 0,67 | 0,35 | 0,89 | 0,45 |
| NBCDK | 0,69 | 0,64 | 0,90 | 0,75 | 0,68 | 0,40 | 0,68 | 0,36 | 0,90 | 0,46 |
| NBCDKGraph | 0,68 | 0,63 | 0,91 | 0,74 | 0,67 | 0,38 | 0,67 | 0,34 | 0,91 | 0,43 |
| NBKRC | 0,71 | 0,65 | 0,95 | 0,77 | 0,70 | 0,46 | 0,70 | 0,40 | 0,95 | 0,45 |
| NBKRC | 0,71 | 0,65 | 0,95 | 0,77 | 0,70 | 0,46 | 0,70 | 0,40 | 0,95 | 0,44 |
| NBMACCS | 0,60 | 0,57 | 0,98 | 0,72 | 0,58 | 0,27 | 0,58 | 0,17 | 0,98 | 0,19 |
| NBPubChem | 0,63 | 0,58 | 0,98 | 0,73 | 0,61 | 0,33 | 0,61 | 0,23 | 0,98 | 0,25 |

**Table S5b: Testing performance of Sglt2 classifiers**

**Table S5b: Testing performance of Sglt2 classifiers**

| **Model** | **AUC** | **Precision** | **Recall** | **F1-Score** | **ROC AUC** | **MCC** | **Balanced Accuracy** | **Kappa** | **Sensitivity** | **Specificity** |
| --- | --- | --- | --- | --- | --- | --- | --- | --- | --- | --- |
| NBFP4C | 0,61 | 0,57 | 0,96 | 0,72 | 0,59 | 0,28 | 0,59 | 0,19 | 0,96 | 0,23 |
| NBFP4 | 0,61 | 0,57 | 0,97 | 0,72 | 0,59 | 0,28 | 0,59 | 0,19 | 0,97 | 0,21 |
| RFAP2D | 0,83 | 0,84 | 0,83 | 0,83 | 0,83 | 0,66 | 0,83 | 0,66 | 0,83 | 0,82 |
| RFEstate | 0,80 | 0,81 | 0,82 | 0,81 | 0,80 | 0,61 | 0,80 | 0,60 | 0,82 | 0,79 |
| RFCDKExt | 0,86 | 0,86 | 0,89 | 0,87 | 0,86 | 0,73 | 0,86 | 0,73 | 0,89 | 0,84 |
| RFCDK | 0,86 | 0,86 | 0,89 | 0,87 | 0,86 | 0,73 | 0,86 | 0,73 | 0,89 | 0,84 |
| RFCDKGraph | 0,84 | 0,84 | 0,86 | 0,85 | 0,84 | 0,68 | 0,84 | 0,68 | 0,86 | 0,82 |
| RFKRC | 0,86 | 0,86 | 0,87 | 0,87 | 0,86 | 0,72 | 0,86 | 0,72 | 0,87 | 0,85 |
| RFKRC | 0,87 | 0,86 | 0,89 | 0,87 | 0,87 | 0,74 | 0,87 | 0,73 | 0,89 | 0,84 |
| RFMACCS | 0,85 | 0,84 | 0,87 | 0,85 | 0,84 | 0,69 | 0,84 | 0,69 | 0,87 | 0,82 |
| RFPubChem | 0,84 | 0,85 | 0,85 | 0,85 | 0,84 | 0,69 | 0,84 | 0,69 | 0,85 | 0,83 |
| RFFP4C | 0,85 | 0,85 | 0,87 | 0,86 | 0,85 | 0,70 | 0,85 | 0,70 | 0,87 | 0,83 |
| RFFP4 | 0,82 | 0,83 | 0,82 | 0,82 | 0,82 | 0,64 | 0,82 | 0,64 | 0,82 | 0,81 |
| SVMAP2D | 0,81 | 0,81 | 0,83 | 0,82 | 0,81 | 0,62 | 0,81 | 0,62 | 0,83 | 0,79 |
| SVMEstate | 0,79 | 0,82 | 0,75 | 0,79 | 0,79 | 0,58 | 0,79 | 0,58 | 0,75 | 0,82 |
| SVMCDKExt | 0,85 | 0,85 | 0,86 | 0,85 | 0,85 | 0,70 | 0,85 | 0,69 | 0,86 | 0,83 |
| SVMCDK | 0,84 | 0,85 | 0,86 | 0,85 | 0,84 | 0,69 | 0,84 | 0,69 | 0,86 | 0,83 |
| SVMCDKGraph | 0,82 | 0,84 | 0,81 | 0,83 | 0,82 | 0,65 | 0,82 | 0,64 | 0,81 | 0,83 |
| SVMKRC | 0,78 | 0,84 | 0,71 | 0,77 | 0,78 | 0,57 | 0,78 | 0,56 | 0,71 | 0,86 |
| SVMKRC | 0,84 | 0,86 | 0,83 | 0,85 | 0,84 | 0,69 | 0,84 | 0,69 | 0,83 | 0,86 |
| SVMMACCS | 0,80 | 0,80 | 0,83 | 0,81 | 0,80 | 0,61 | 0,80 | 0,61 | 0,83 | 0,78 |
| SVMPubChem | 0,82 | 0,81 | 0,84 | 0,83 | 0,81 | 0,63 | 0,81 | 0,63 | 0,84 | 0,79 |
| SVMFP4C | 0,73 | 0,72 | 0,79 | 0,75 | 0,73 | 0,47 | 0,73 | 0,46 | 0,79 | 0,68 |
| SVMFP4 | 0,77 | 0,84 | 0,70 | 0,76 | 0,78 | 0,56 | 0,78 | 0,55 | 0,70 | 0,86 |
| XGBoostAP2D | 0,84 | 0,85 | 0,85 | 0,85 | 0,84 | 0,68 | 0,84 | 0,68 | 0,85 | 0,84 |
| XGBoostEstate | 0,80 | 0,80 | 0,82 | 0,81 | 0,80 | 0,60 | 0,80 | 0,60 | 0,82 | 0,78 |
| XGBoostCDKExt | 0,87 | 0,87 | 0,88 | 0,88 | 0,87 | 0,74 | 0,87 | 0,74 | 0,88 | 0,86 |
| XGBoostCDK | 0,87 | 0,86 | 0,88 | 0,87 | 0,86 | 0,73 | 0,86 | 0,73 | 0,88 | 0,85 |
| XGBoostCDKGraph | 0,83 | 0,83 | 0,86 | 0,84 | 0,83 | 0,67 | 0,83 | 0,67 | 0,86 | 0,81 |
| XGBoostKRC | 0,86 | 0,86 | 0,87 | 0,87 | 0,86 | 0,72 | 0,86 | 0,72 | 0,87 | 0,84 |
| XGBoostKRC | 0,86 | 0,87 | 0,86 | 0,86 | 0,86 | 0,72 | 0,86 | 0,72 | 0,86 | 0,86 |
| XGBoostMACCS | 0,84 | 0,84 | 0,85 | 0,84 | 0,84 | 0,67 | 0,84 | 0,67 | 0,85 | 0,83 |
| XGBoostPubChem | 0,85 | 0,86 | 0,85 | 0,86 | 0,85 | 0,71 | 0,85 | 0,70 | 0,85 | 0,85 |
| XGBoostFP4C | 0,85 | 0,86 | 0,86 | 0,86 | 0,85 | 0,71 | 0,85 | 0,71 | 0,86 | 0,85 |
| XGBoostFP4 | 0,83 | 0,85 | 0,83 | 0,84 | 0,83 | 0,67 | 0,83 | 0,66 | 0,83 | 0,84 |

**Table S6**: Tentative identification of M. *oleifera* metabolites based on LC–ESI–QTOF–MS/MS analysis, showing retention times, measured masses, mass errors, and diagnostic fragment ions.

| Rt/min | Identification | Molecular Formula | Calculated | Measured mass | Error(ppm) | MS/MS fragment ions |
| --- | --- | --- | --- | --- | --- | --- |
| 5,5 | Vitexin | C21H20O10 | 431,09837 | 431,097 | -3,178 | 281,044, 282,052, 283,06, 311,05, 341,066 |
| 5,28 | homoorientin | C21H20O11 | 447,0947 | 447,092 | -6,039 | 227,03, 255,029, 284,032 |
| 5,97 | Kaempferol-3-O-glucoside | C21H20O11 | 447,0983 | 447,097 | -2,908 | 151,00, 227,03, 256,03, 285,03, 255,030,284,03,327,050 |
| 5,78 | Hyperoside | C21H20O12 | 463,0882 | 463,087 | -2,591 | 255,02, 271,02, 300,03, 301,03 |
| 5,97 | Isorhamnetin 3-galactoside | C22H22O12 | 477,108 | 477,106 | -4,192 | 243,029, 271,024, 285,039, 314,0420 |
| 6,04 | Kaempferol 3-O-acetyl-glucoside | C23H22O12 | 489,103 | 489,102 | -2,045 | 227,034, 255,029, 284,036 |
| 5,86 | Quercetin 3-O-(6-O-acetyl-beta-D-glucopyranoside) | C23H22O13 | 505,099 | 505,097 | -3,960 | 255,029, 271,024, 300,030 |
| 6,06 | Massbank:PR309279 Flavone base + 4O, O-MalonylHex | C24H22O14 | 533,094 | 533,092 | -3,752 | 229,049, 255,029, 257,045,284,034, 285,042 |
| 5,98 | Quercetin 3-O-malonylglucoside | C24H22O15 | 549,088 | 549,086 | -3,642 | 255,029, 257,0450, 285,0420 |
| 5,38 | NCGC00381165-01!5,7-dihydroxy-2-phenyl-6,8-bis [3,4,5-trihydroxy-6-(hydroxymethyl)oxan-2-yl]chromen-4-one | C27H30O14 | 577,156 | 577,154 | -3,465 | 281,08,337,07, 367,079, 457,11, 487,12 |
| 6,58 | Flavonol base + 3O, O-Hex+C6H9O4 | C27H28O15 | 591,134 | 591,135 | 1,692 | 285,04, 447,09, 489,10 |
| 5,95 | Kaempferol-3-O-rutinoside | C27H30O15 | 593,149 | 593,148 | -1,686 | 285,04, 287,04,449,09 |
| 5,11 | Isovitexin 8-C-beta-glucoside | C27H30O15 | 593,15 | 593,149 | -1,686 | 285,04, 287,04,449,10 |
| 5,72 | Rutin | C27H30O16 | 609,1457 | 609,143 | -4,432 | 271,10, 300,029, 505,09, 506,097,507,10 |
| 5,94 | isorhamnetin-3-O-rutinoside | C28H32O16 | 623,17 | 623,168 | -3,209 | 300,026,314,04,315,051, 431,14 |
| 4,62 | Quercetin-3,4’-O-di-beta-glucoside | C27H30O17 | 625,143 | 625,139 | -6,399 | 299,019, 301,030, 462,29 |
| 6,21 | Kaempferol-3-O-(6’’’-trans-p-coumaroyl-2’’-glucosyl)rhamnoside | C36H36O17 | 739,186 | 739,185 | -1,353 | 284,03, 285,040, 593,14 |
| 6,03 | quercetin 3-O-[2’’-O-6-Z-p-coumaroyl-glucopyranoside] -rhamnopyranoside | C36H36O18 | 755,186 | 755,185 | -1,324 | 301,03, 463,08, 609,13 |
|  | Coumaroylquinic acid | C16H18O8 | 337,14837 | 337,149 | 1,869 | 101,02, 111,037, 113,024, 119,045,163,03,173,05,191,056 |
|  | Feruloyl quinic acid | C17H20O9 | 367,128 | 367,127 | -2,724 | 117,03, 134,04,193,05 |
|  | Neochlorogenic acid | C16H18O9 | 353,0878 | 353,087 | -2,266 | 119,04, 135,044,179,034,191,057 |
|  | 3,4-Dicaffeoylquinic acid | C25H24O12 | 515,141 | 515,139 | -3,882 | 135,04,173,04, 179,03 |
| 7,6 | N,α-L-rhamnopyranosyl vincosamide | C32H40N2O13 | 659.245 | 659.246 | 1,78 | 469.1980, 513.1879, 641.2352, 615.2559 |
| 8.61 | Lariciresinol 4-O-beta-D-glucopyranoside | C26H34O11 | 521.25 | 521.23 |  | 152.99, 171.089, 183.14, 195.14, 275.20, 293.21 |


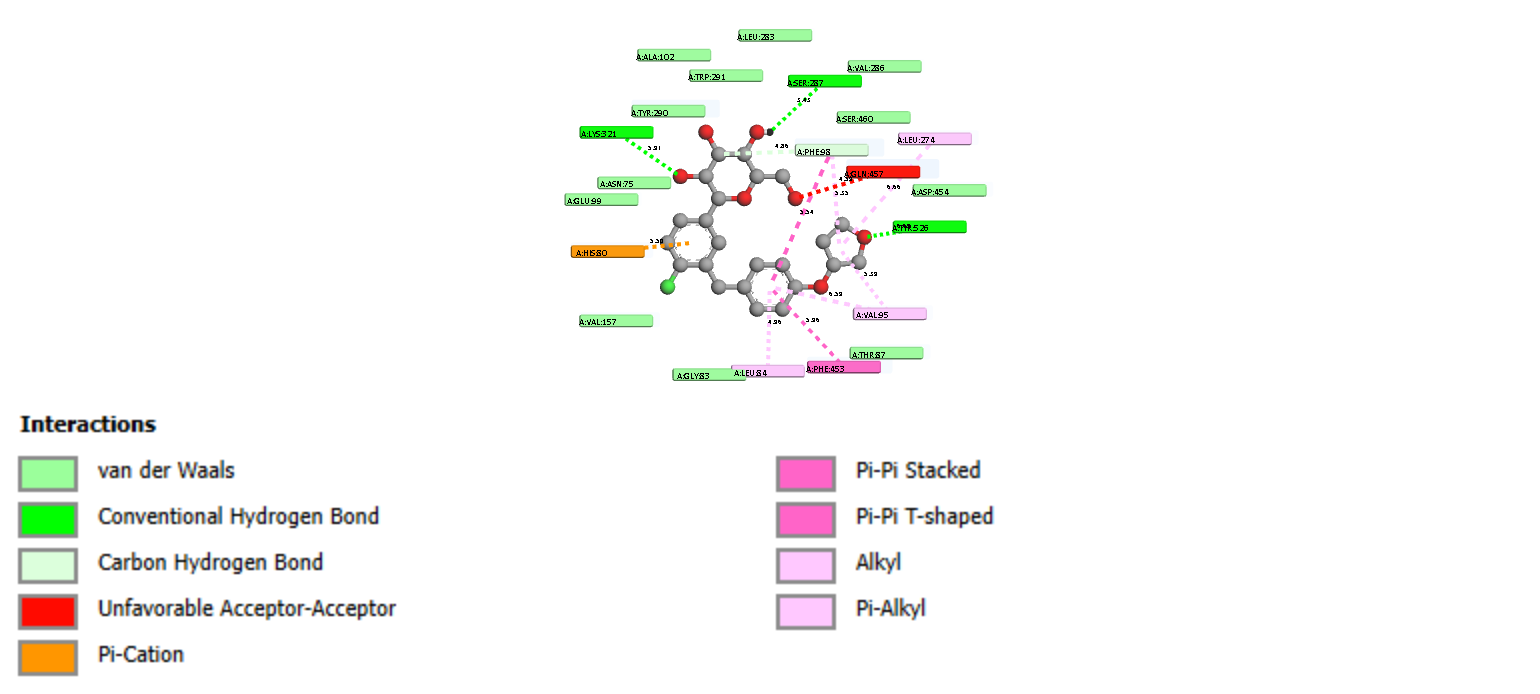

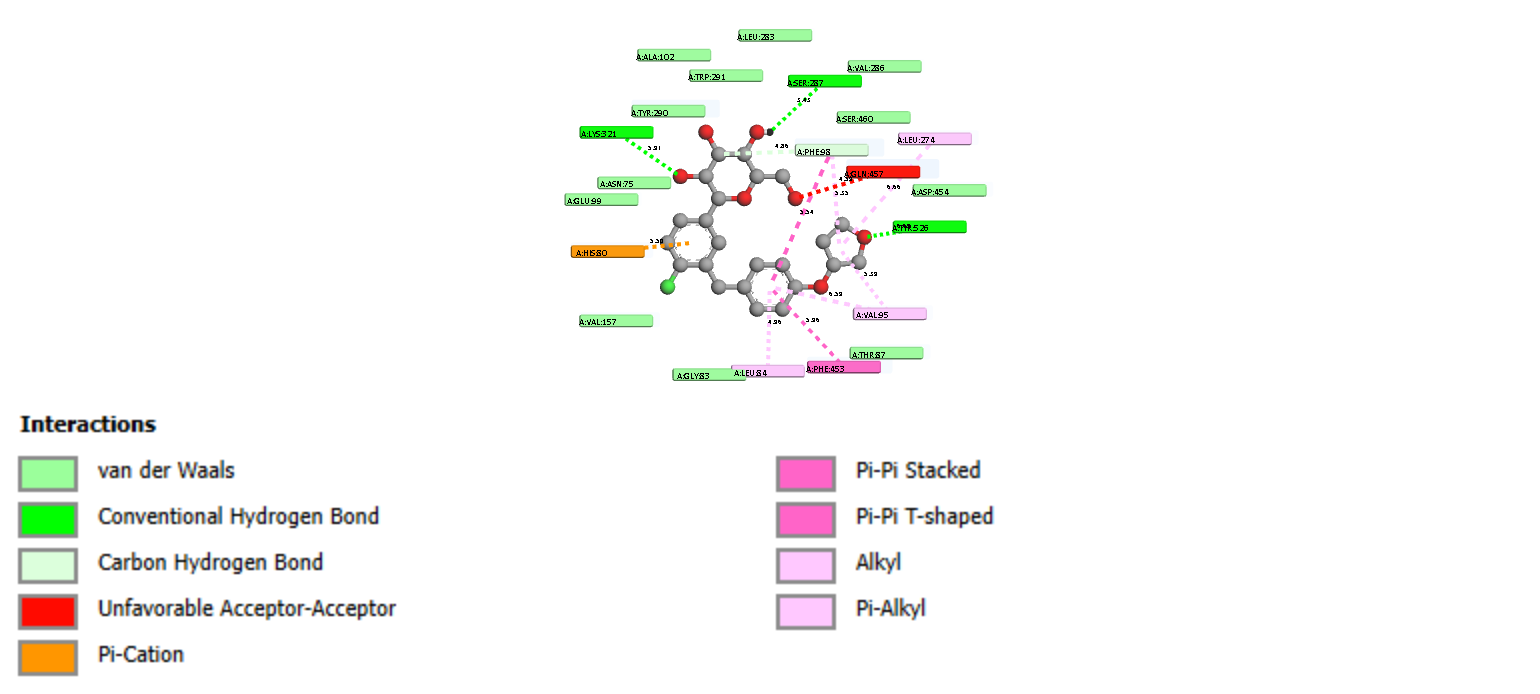

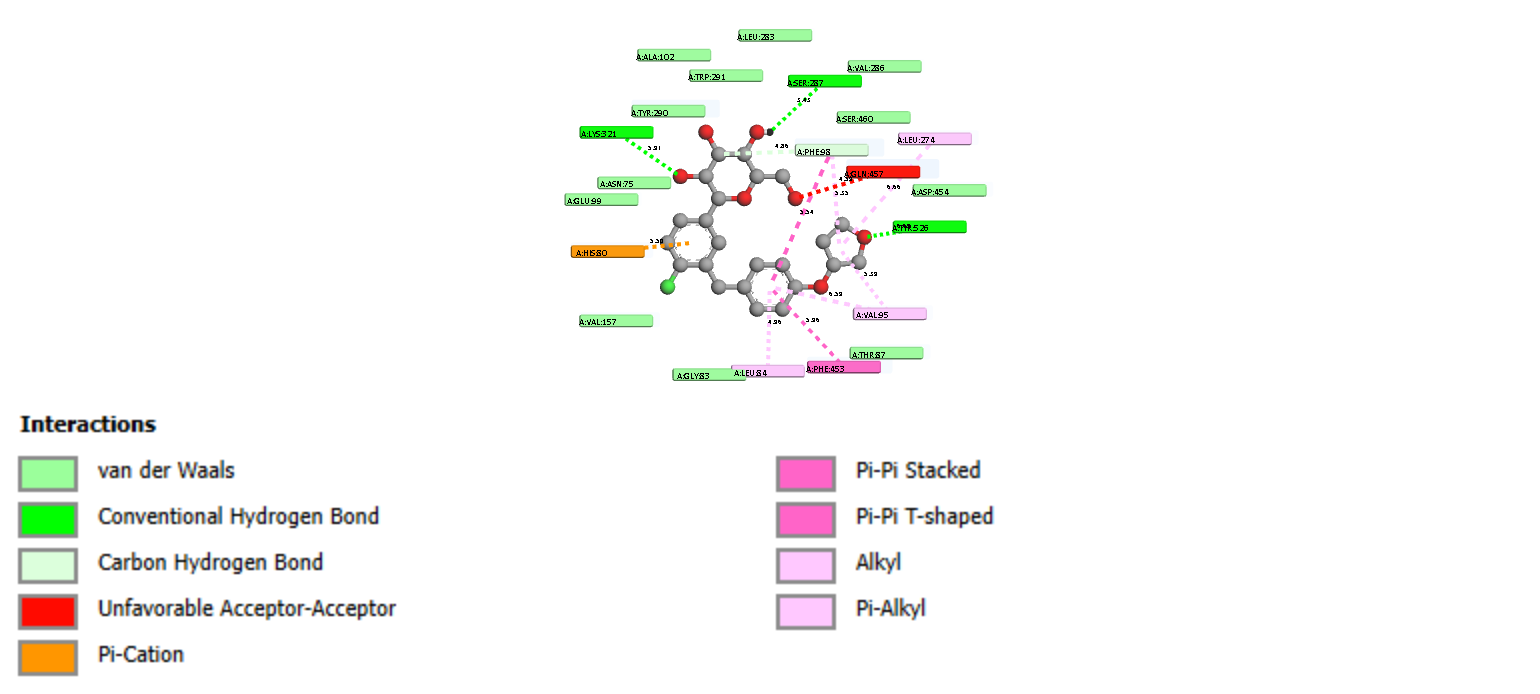


**A**


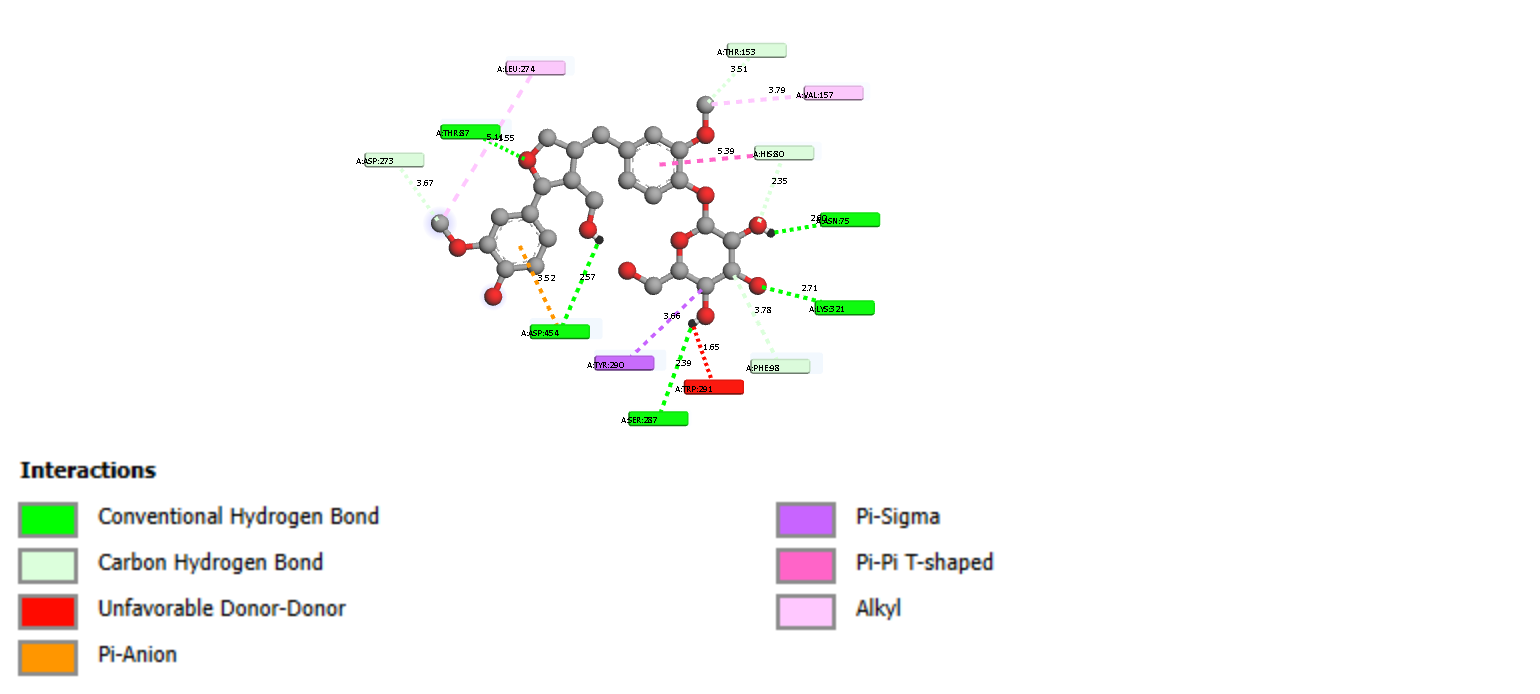

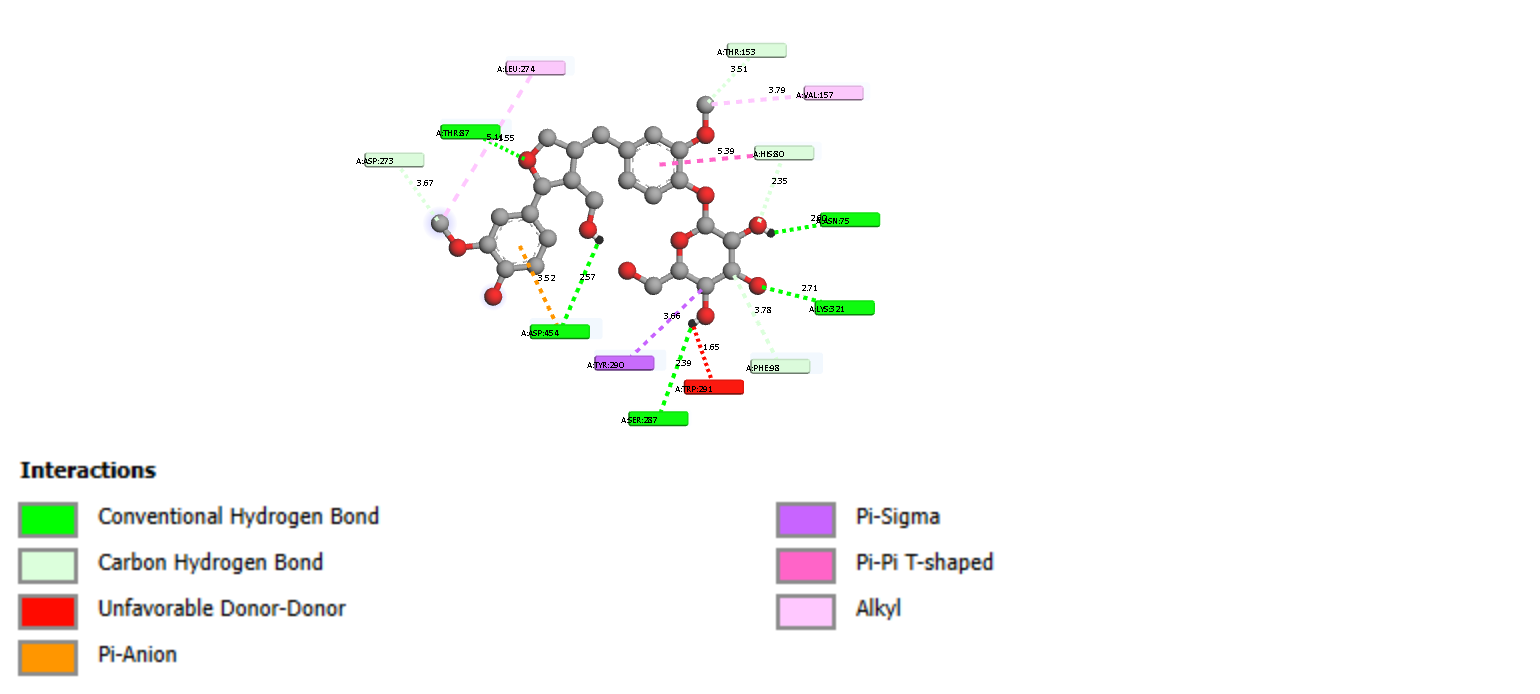

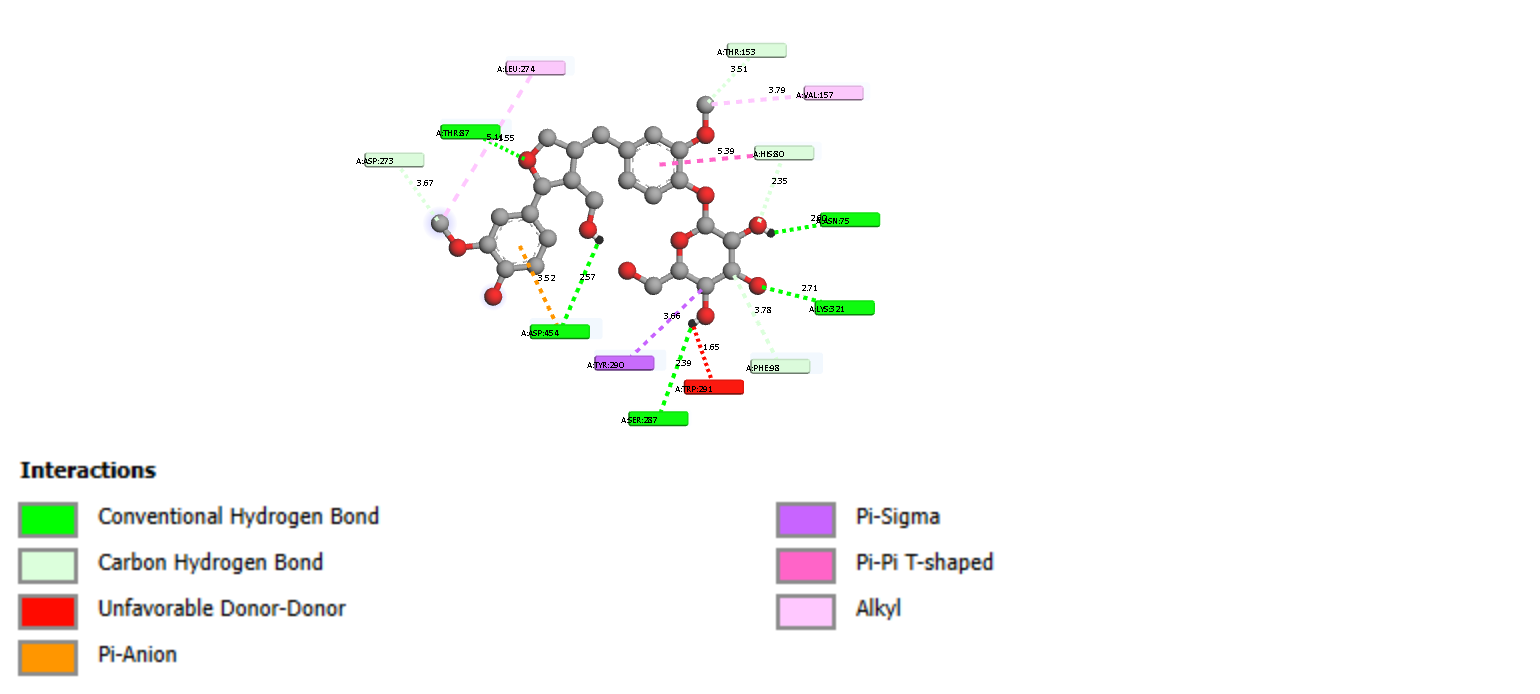


**B**


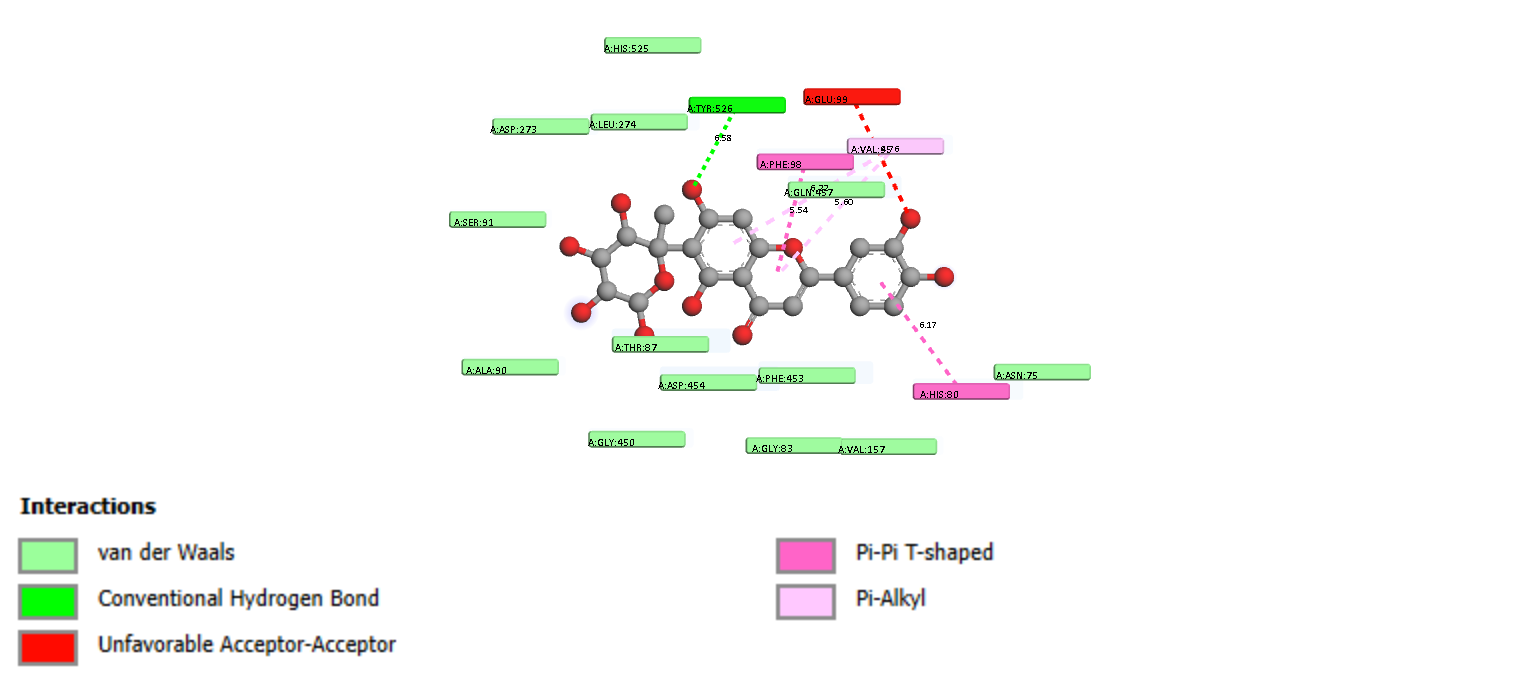

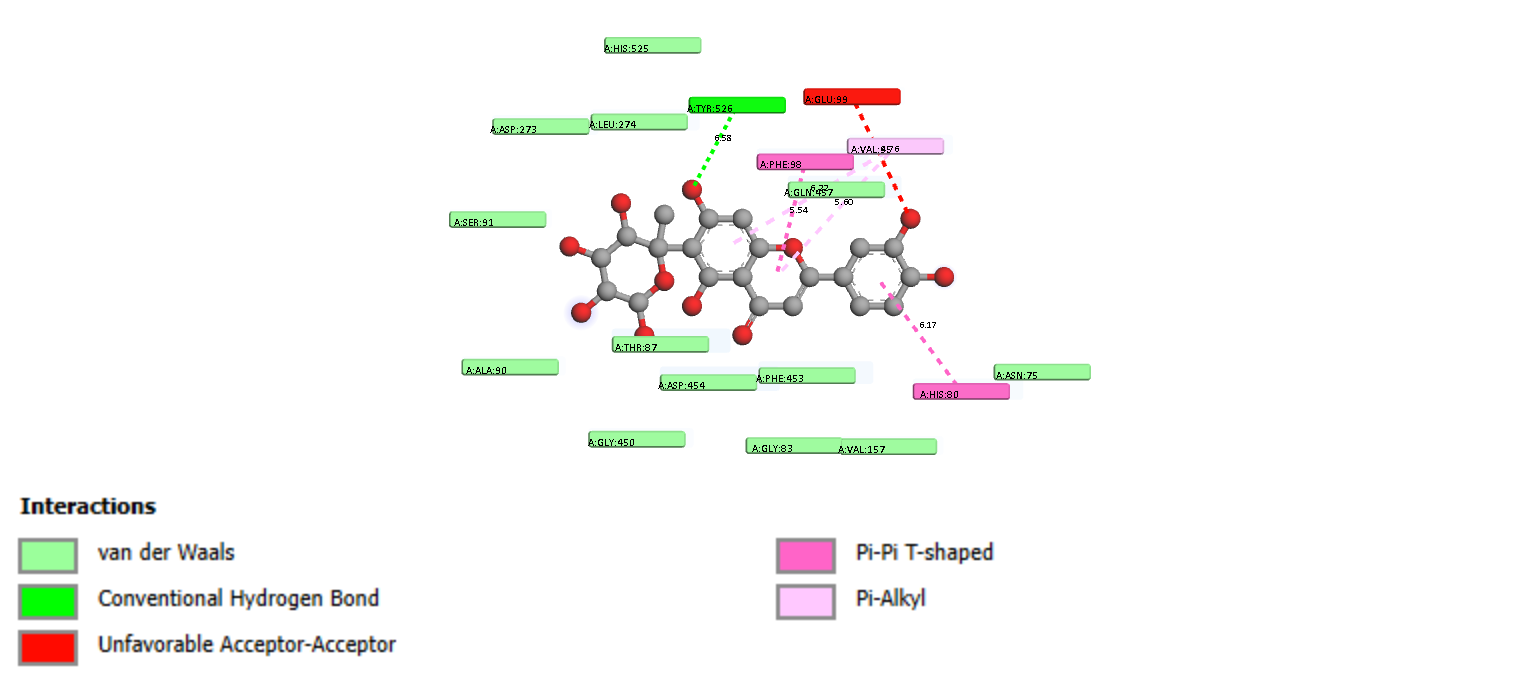

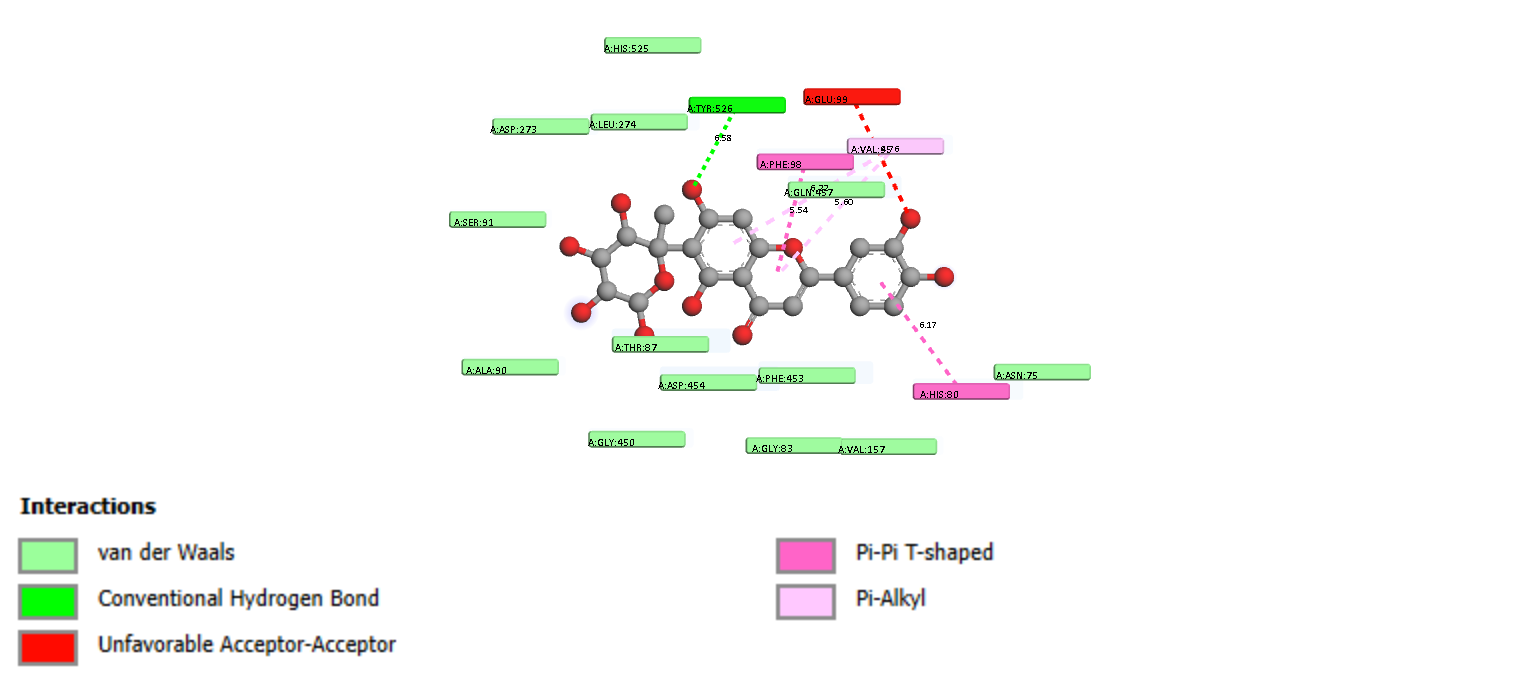


**C**


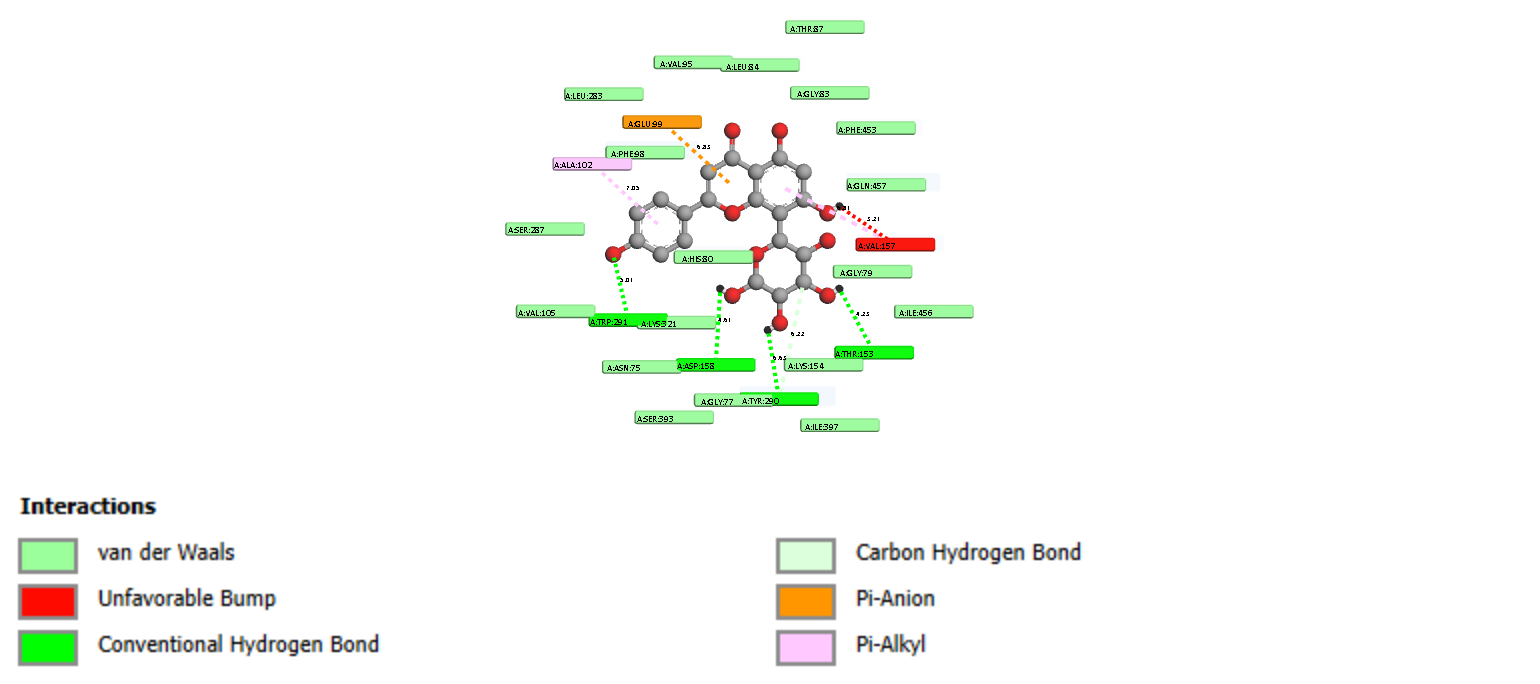

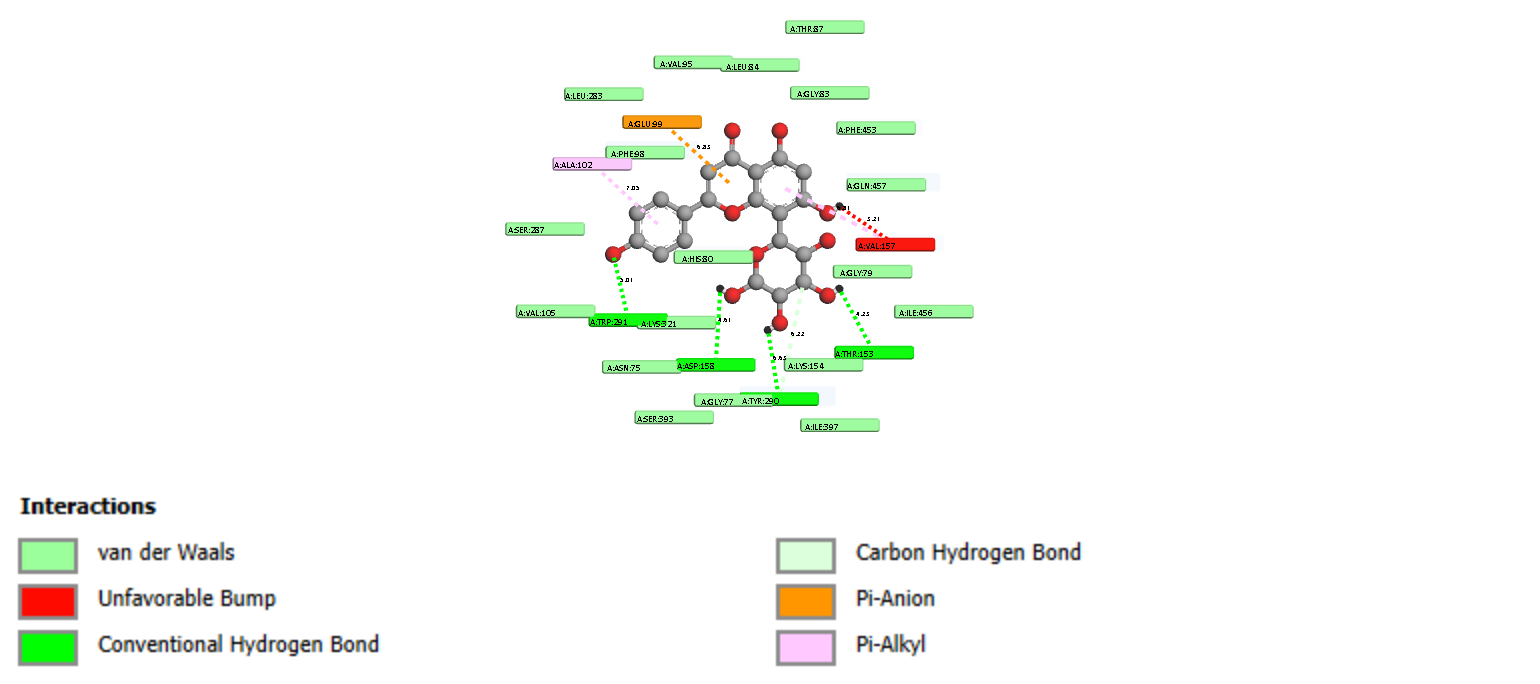

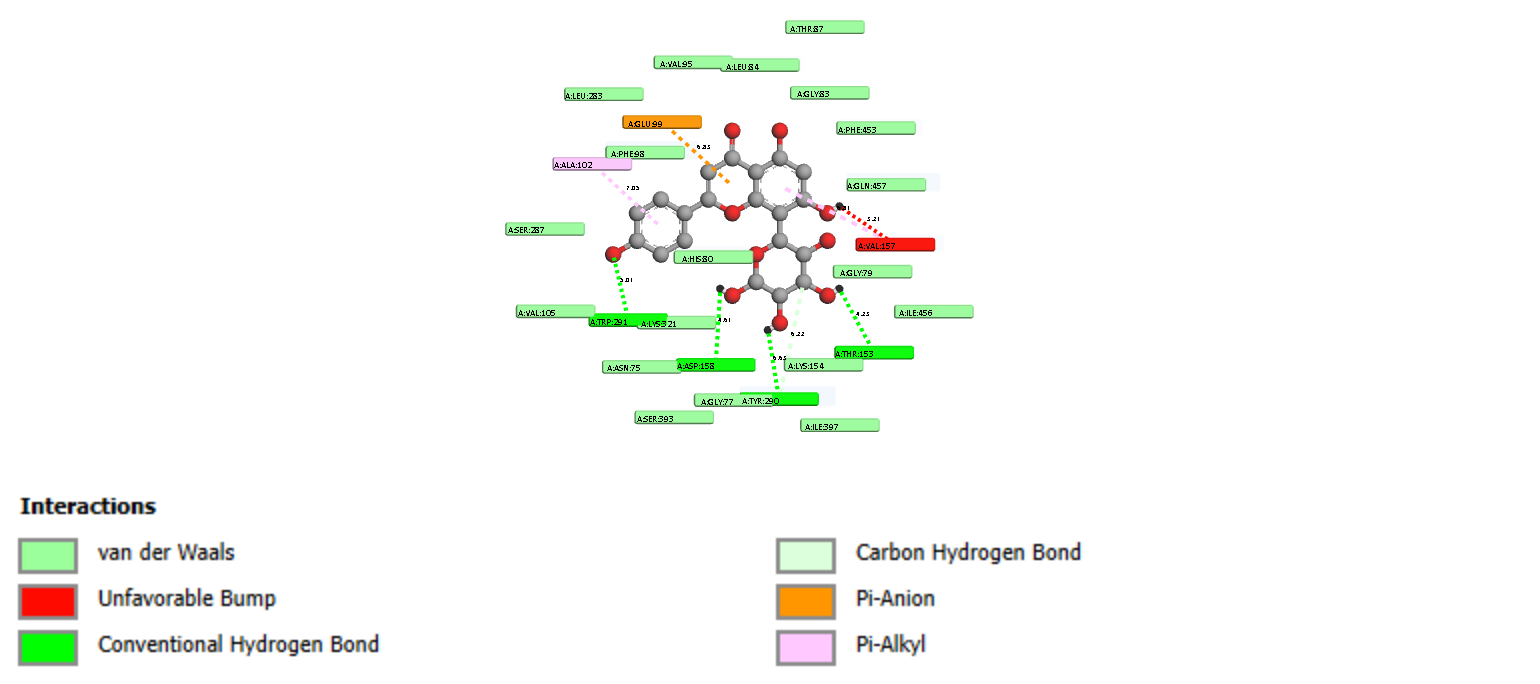


**D**


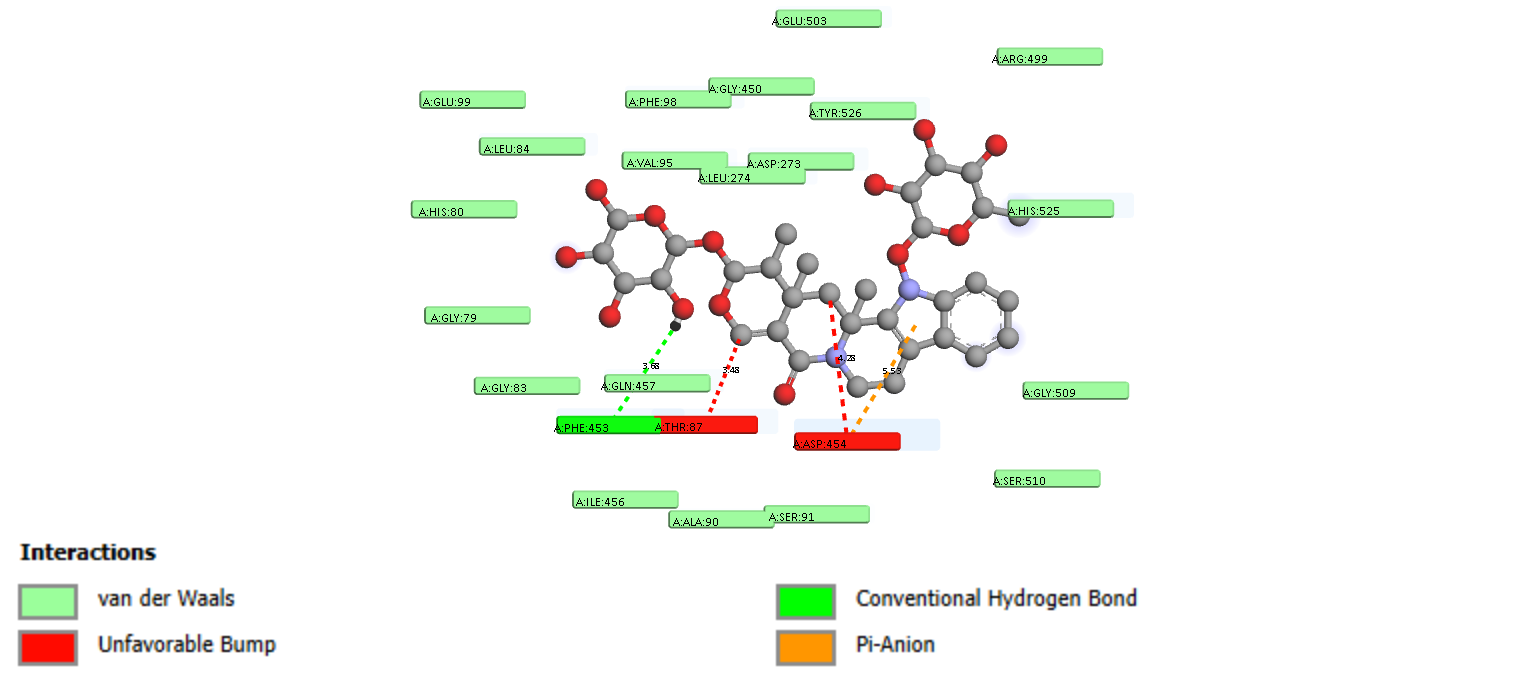

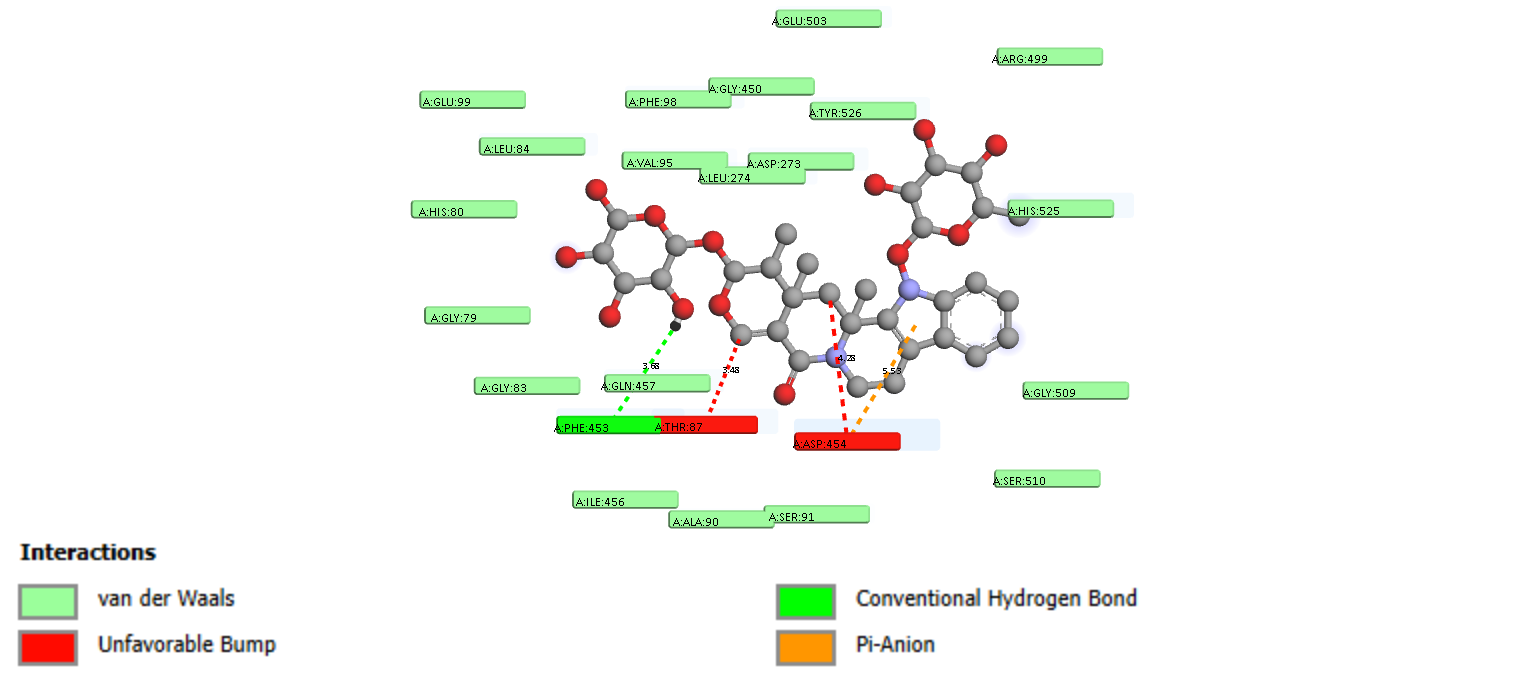

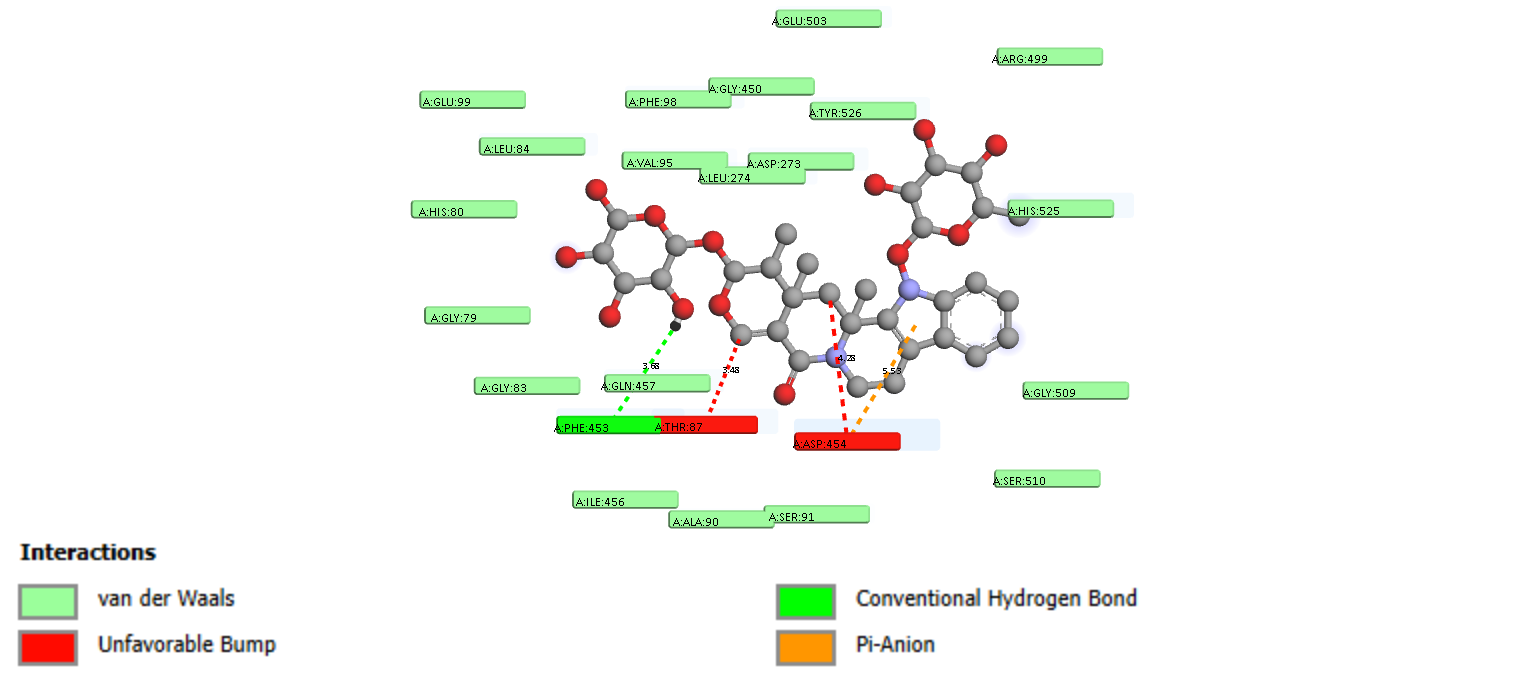


**E**

**Figure S7.** 2D representation of SGLT (7VSI) interaction with the standard drugs like (E) (A) Empagliflozin and (B), Lariciresinol-4-O-beta-D-glucopyranoside, (C) Homoorientin,  (D) Vitexin, (E)N, α-L-rhamnopyranosyl vincosamide.


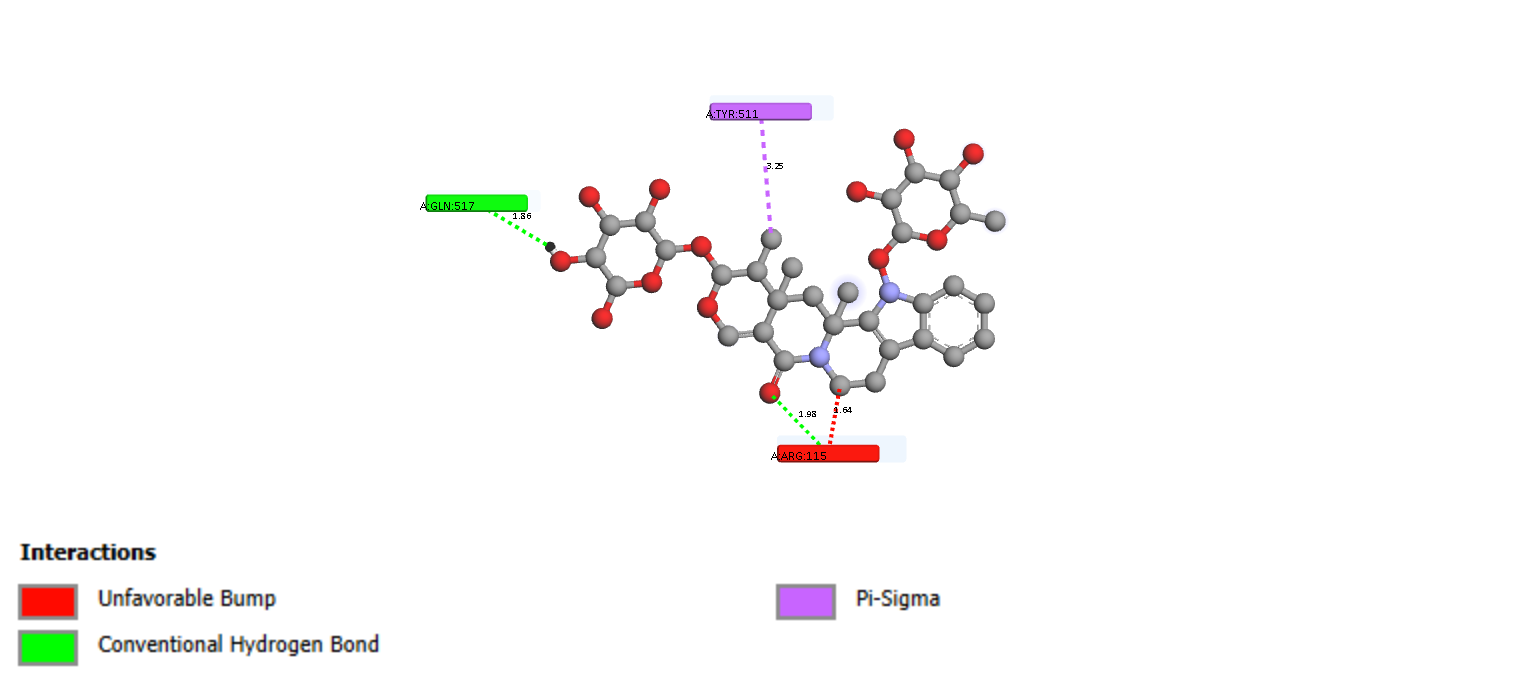

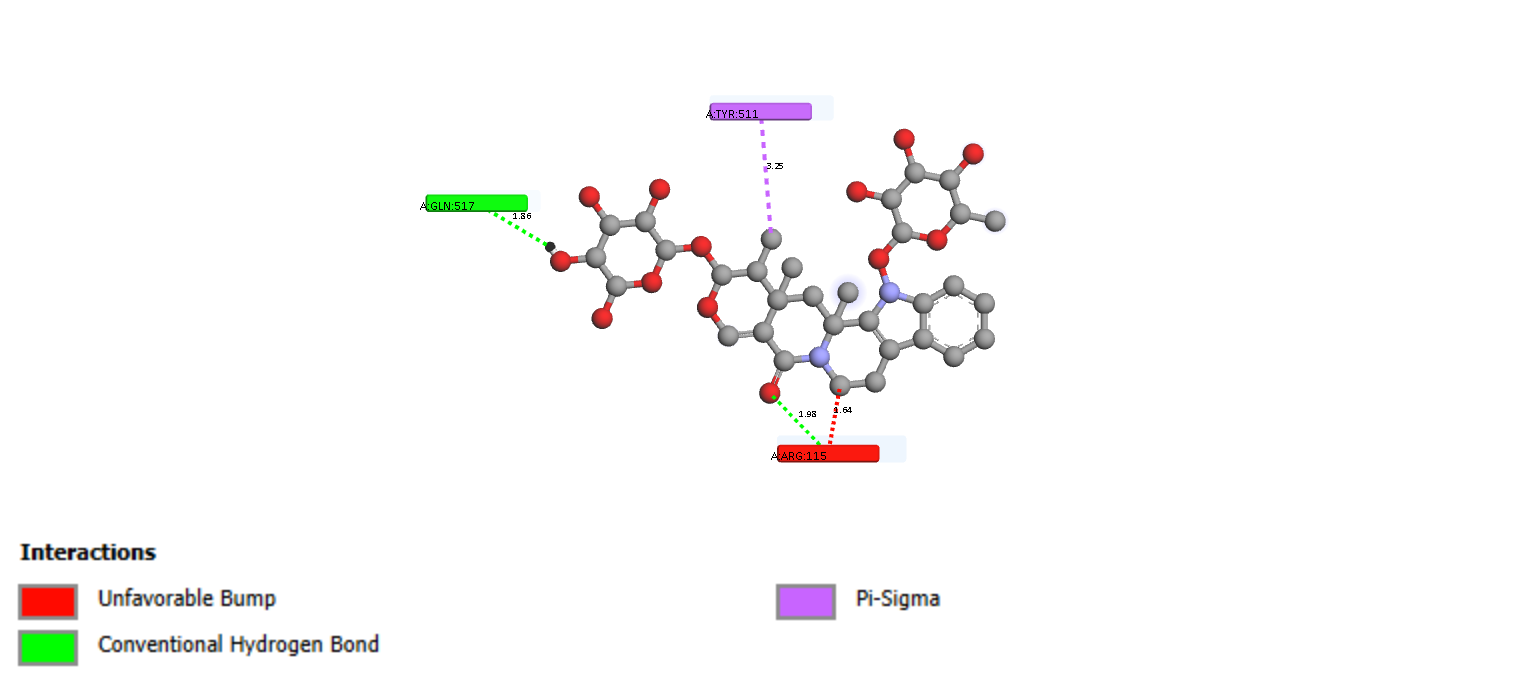

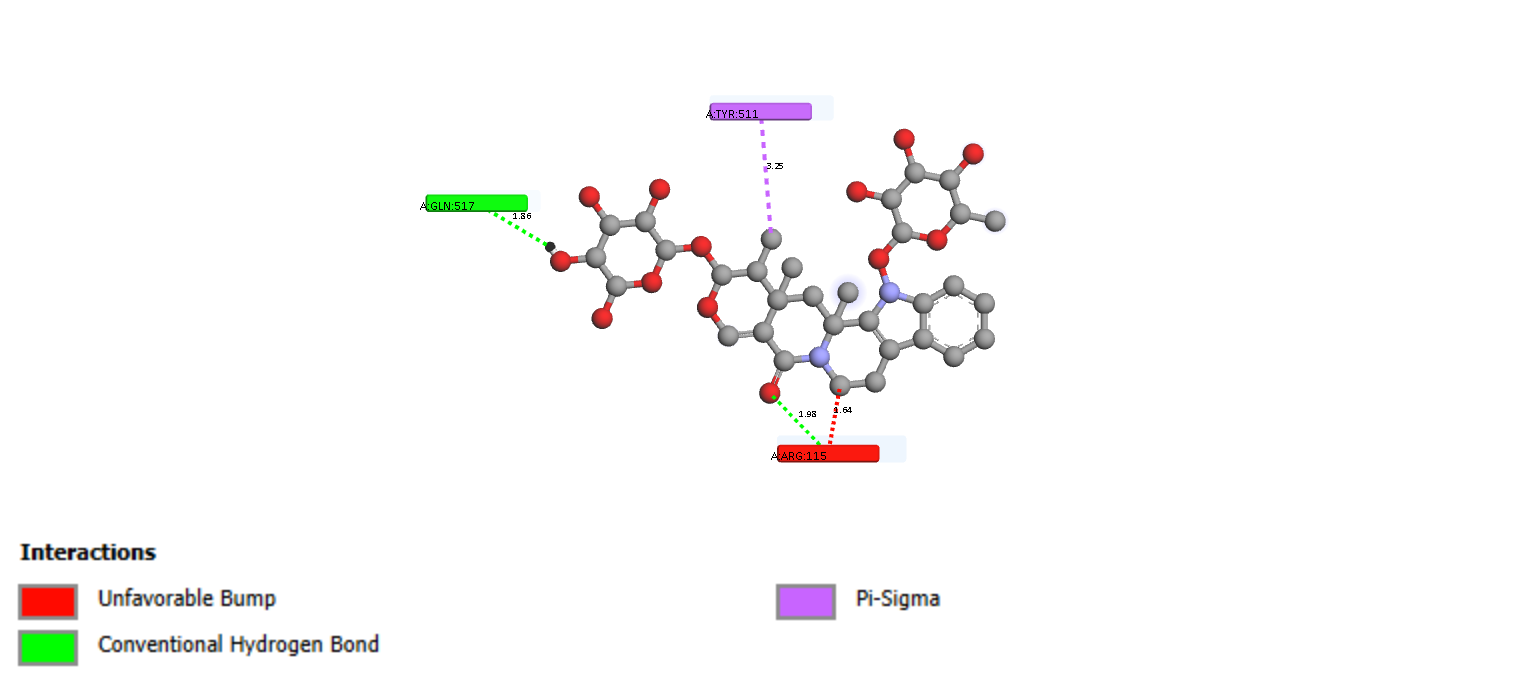

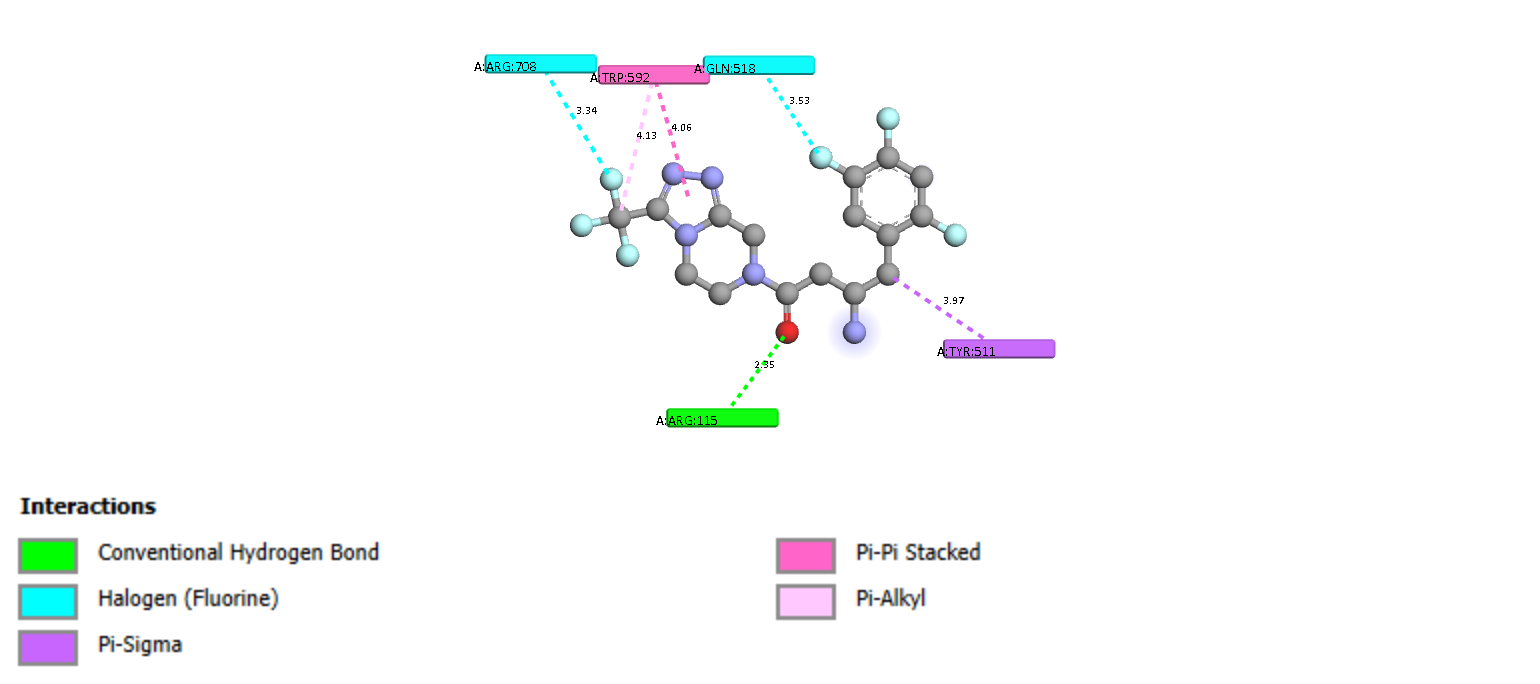

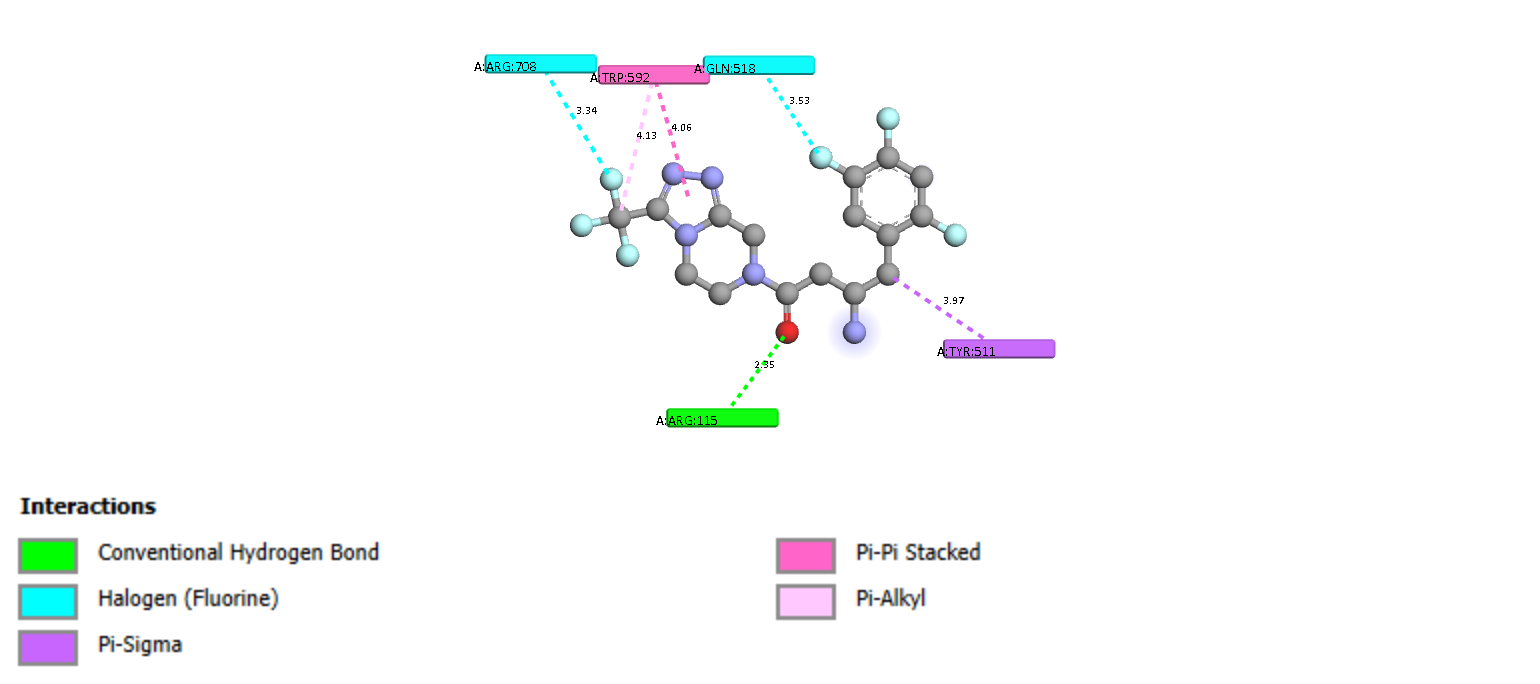

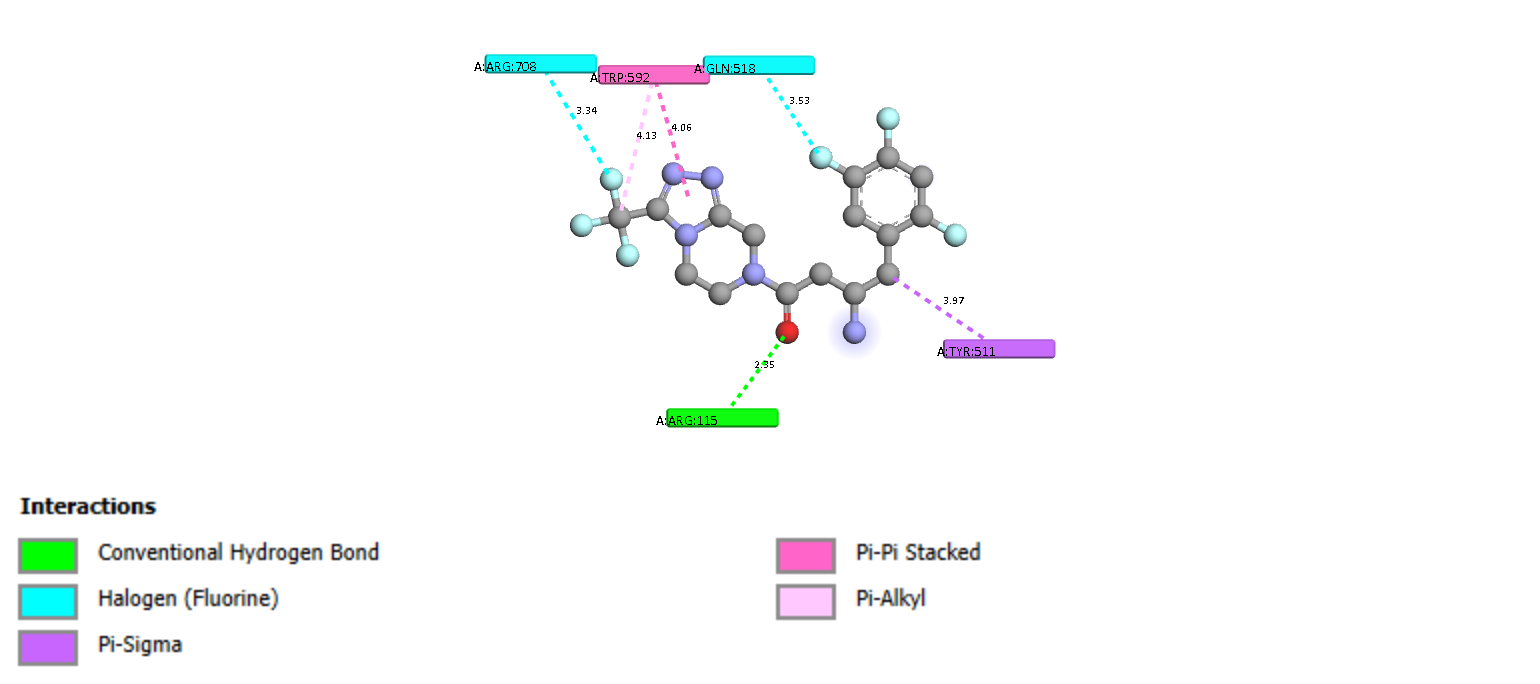


**Figure S8.** *2D representation of DPPIV (5OLJ) interaction with the standard (A) Sitagliptin and (B) N, α-L-rhamnopyranosyl vincosamide*
